# Supplementary material for: New 3-Acyl Tetramic Acid Derivatives from the Deep-Sea-Derived Fungus Lecanicillium fusisporum
Source: MDPI journal article supplement (doi:10.3390/md20040255), 2022-04-06
Supplement: s1 [file s1]

# Supporting Information

## New 3-Acyl Tetramic acid Derivatives from the Deep-Sea-Derived Fungus *Lecanicillium fuisporum*

Xinya Xu <sup>1,†</sup>, Yanhui Tan <sup>2,†</sup>, Chenghai Gao <sup>1</sup>, Kai Liu<sup>1</sup>, Zhenzhou Tang <sup>1</sup>, Chunju Lu <sup>1</sup>, Haiyan Li <sup>1</sup>, Xiaoyong Zhang <sup>3,\*</sup> and Yonghong Liu <sup>1,\*</sup>

<sup>1</sup> Institute of Marine Drugs, Guangxi University of Chinese Medicine, Nanning 530200, P. R. China; xyxu@gxcmu.edu.cn (X. X.); gaoch@gxcmu.edu.cn (C. G.); liuk@gxcmu.edu.cn (K. L.); tangzz@gxcmu.edu.cn (Z. T.); luchunjv@stu.gxcmu.edu.cn (C. L.); lihaiyan12368@163.com (H. L.); yonghongliu@scsio.ac.cn (Y. L.)

<sup>2</sup> School of Chemistry and Pharmaceutical Science, State Key Laboratory for the Chemistry and Molecular Engineering of Medicinal Resources, Guangxi Normal University, Guilin 541004, P. R. China; tyh533@smu.edu.cn

<sup>3</sup> College of Marine Sciences, South China Agricultural University, Guangzhou 510642, P. R. China; zhangxiaoyong@scau.edu.cn

\* Correspondence: zhangxiaoyong@scau.edu.cn; yonghongliu@scsio.ac.cn

† These authors contributed equally to this paper.

## Table of Contents

|                                                                                                                                     |    |
|-------------------------------------------------------------------------------------------------------------------------------------|----|
| Figure S1. The colonies and the ITS rRNA sequences data of deep-sea-derived fungus <i>Lecanicillium fusisporum</i> GXIMD00542 ..... | 4  |
| Figure S2. <sup>1</sup> H NMR spectrum of 1.....                                                                                    | 4  |
| Figure S3. <sup>13</sup> C NMR spectrum of 1.....                                                                                   | 5  |
| Figure S4. HSQC spectrum of 1 .....                                                                                                 | 5  |
| Figure S5. <sup>1</sup> H- <sup>1</sup> H COSY spectrum of 1 .....                                                                  | 6  |
| Figure S6. HMBC spectrum of 1 .....                                                                                                 | 6  |
| Figure S7. NOESY spectrum of 1.....                                                                                                 | 7  |
| Figure S8. HR-ESI-MS spectrum of 1 .....                                                                                            | 7  |
| Table S1. Crystal data and structure refinement for compound 1.....                                                                 | 8  |
| Figure S9. <sup>1</sup> H NMR spectrum of 2.....                                                                                    | 9  |
| Figure S10. <sup>13</sup> C NMR spectrum of 2.....                                                                                  | 9  |
| Figure S11. HSQC spectrum of 2 .....                                                                                                | 10 |
| Figure S12. <sup>1</sup> H- <sup>1</sup> H COSY spectrum of 2 .....                                                                 | 10 |
| Figure S13. HMBC spectrum of 2 .....                                                                                                | 11 |
| Figure S14. NOESY spectrum of 2.....                                                                                                | 11 |
| Figure S15. HR-ESI-MS spectrum of 2 .....                                                                                           | 12 |
| Figure S16. <sup>1</sup> H NMR spectrum of 3.....                                                                                   | 12 |
| Figure S17. <sup>13</sup> C NMR spectrum of 3.....                                                                                  | 13 |
| Figure S18. HSQC spectrum of 3 .....                                                                                                | 13 |
| Figure S19. <sup>1</sup> H- <sup>1</sup> H COSY spectrum of 3 .....                                                                 | 14 |
| Figure S20. HMBC spectrum of 3 .....                                                                                                | 14 |
| Figure S21. NOESY spectrum of 3.....                                                                                                | 15 |
| Figure S22. HR-ESI-MS spectrum of 3 .....                                                                                           | 15 |
| Figure S23. <sup>1</sup> H NMR spectrum of 4.....                                                                                   | 16 |
| Figure S24. <sup>13</sup> C NMR spectrum of 4.....                                                                                  | 16 |
| Figure S25. HSQC spectrum of 4 .....                                                                                                | 17 |
| Figure S26. <sup>1</sup> H- <sup>1</sup> H COSY spectrum of 4 .....                                                                 | 17 |
| Figure S27. HMBC spectrum of 4 .....                                                                                                | 18 |
| Figure S28. NOESY spectrum of 4.....                                                                                                | 18 |
| Figure S29. HR-ESI-MS spectrum of 4 .....                                                                                           | 19 |
| Figure S30. <sup>1</sup> H NMR spectrum of 5.....                                                                                   | 19 |
| Figure S31. <sup>13</sup> C NMR spectrum of 5.....                                                                                  | 20 |
| Figure S32. HSQC spectrum of 5 .....                                                                                                | 20 |
| Figure S33. <sup>1</sup> H- <sup>1</sup> H COSY spectrum of 5 .....                                                                 | 21 |
| Figure S34. HMBC spectrum of 5 .....                                                                                                | 21 |
| Figure S35. NOESY spectrum of 5.....                                                                                                | 22 |
| Figure S36. 1D selective NOESY spectrum of 5 .....                                                                                  | 22 |
| Figure S37. 1D selective NOESY spectrum of 5 .....                                                                                  | 23 |
| Figure S38. HR-ESI-MS spectrum of 5 .....                                                                                           | 23 |
| Figure S39. <sup>1</sup> H NMR spectrum of 6.....                                                                                   | 24 |
| Figure S40. <sup>13</sup> C NMR spectrum of 6.....                                                                                  | 24 |

|                                                                                                                                                                                                                                |    |
|--------------------------------------------------------------------------------------------------------------------------------------------------------------------------------------------------------------------------------|----|
| Figure S41. HSQC spectrum of 6 .....                                                                                                                                                                                           | 25 |
| Figure S42. <sup>1</sup> H- <sup>1</sup> H COSY spectrum of 6 .....                                                                                                                                                            | 25 |
| Figure S43. HMBC spectrum of 6 .....                                                                                                                                                                                           | 26 |
| Figure S44. NOESY spectrum of 6.....                                                                                                                                                                                           | 26 |
| Figure S45. HR-ESI-MS spectrum of 6 .....                                                                                                                                                                                      | 27 |
| Figure S46. <sup>1</sup> H NMR spectrum of 7.....                                                                                                                                                                              | 27 |
| Figure S47. <sup>13</sup> C NMR spectrum of 7.....                                                                                                                                                                             | 28 |
| Figure S48. HSQC spectrum of 7 .....                                                                                                                                                                                           | 28 |
| Figure S49. <sup>1</sup> H- <sup>1</sup> H COSY spectrum of 7.....                                                                                                                                                             | 29 |
| Figure S50. HMBC spectrum of 7 .....                                                                                                                                                                                           | 29 |
| Figure S51. NOESY spectrum of 7.....                                                                                                                                                                                           | 30 |
| Figure S52. HR-ESI-MS spectrum of 7 .....                                                                                                                                                                                      | 30 |
| Figure S53. <sup>1</sup> H NMR spectrum of ( <i>R</i> )-MTPA ester of 7 .....                                                                                                                                                  | 31 |
| Figure S54. <sup>1</sup> H NMR spectrum of ( <i>S</i> )-MTPA ester of 7.....                                                                                                                                                   | 31 |
| Table S2. Relative free energies <sup>a</sup> and equilibrium populations <sup>b</sup> of conformers for (3 <i>S</i> , 6 <i>S</i> , 10 <i>R</i> )-2a <sup>c</sup> .....                                                        | 31 |
| Figure S55. The optimized structures (left) and the calculated CD spectra of conformers (3 <i>S</i> , 6 <i>S</i> , 10 <i>R</i> )-2a in MeOH at M06-2X/def2TZVP level (right). $\sigma=0.30$ eV. ....                           | 34 |
| Table S3. Relative free energies <sup>a</sup> and equilibrium populations <sup>b</sup> of conformers for (3 <i>S</i> , 6 <i>R</i> , 10 <i>S</i> )-2b <sup>c</sup> .....                                                        | 34 |
| Figure S56. The optimized structures (left) and the calculated CD spectra of conformers (3 <i>S</i> , 6 <i>R</i> , 10 <i>S</i> )-2b in MeOH at M06-2X/def2TZVP level (right). $\sigma=0.30$ eV.....                            | 35 |
| Table S4. Relative free energies <sup>a</sup> and equilibrium populations <sup>b</sup> of conformers for (3 <i>S</i> , 6 <i>S</i> , 9 <i>R</i> )-3a <sup>c</sup> .....                                                         | 35 |
| Figure S57. The optimized structure of conformers for (3 <i>S</i> , 6 <i>S</i> , 9 <i>R</i> )-3a in MeOH at B3LYP/6-31G (d) level.....                                                                                         | 36 |
| Table S5. Relative free energies <sup>a</sup> and equilibrium populations <sup>b</sup> of conformers for (3 <i>S</i> , 6 <i>R</i> , 9 <i>S</i> )-3b <sup>c</sup> .....                                                         | 36 |
| Figure S58. The optimized structure of conformers for (3 <i>S</i> , 6 <i>R</i> , 9 <i>S</i> )-3b in MeOH at B3LYP/6-31G (d) level.....                                                                                         | 37 |
| Figure S59. Correlation plots of experimental <sup>13</sup> C NMR chemical shifts versus the corresponding calculated data for (3 <i>S</i> , 6 <i>S</i> , 9 <i>R</i> )-3a and (3 <i>S</i> , 6 <i>R</i> , 9 <i>S</i> )-3b ..... | 38 |
| Figure S60. DP4+ probabilities (%) for conformers (3 <i>S</i> , 6 <i>S</i> , 9 <i>R</i> )-3a (isomer 1) and (3 <i>S</i> , 6 <i>R</i> , 9 <i>S</i> )-3b (isomer 2).....                                                         | 38 |
| Table S6. Relative free energies <sup>a</sup> and equilibrium populations <sup>b</sup> of conformers for (3 <i>S</i> ,6 <i>S</i> ,9 <i>S</i> )-4a <sup>c</sup> .                                                               | 38 |
| Figure S61. The optimized structures (left) and the calculated CD spectra for conformers (3 <i>S</i> ,6 <i>S</i> ,9 <i>S</i> )-4a in MeOH at M06-2X/def2TZVP level (right). $\sigma=0.30$ eV. ....                             | 40 |
| Table S7. Relative free energies <sup>a</sup> and equilibrium populations <sup>b</sup> of conformers for (3 <i>S</i> ,6 <i>R</i> ,9 <i>R</i> )-4b <sup>c</sup> 40                                                              | 40 |
| Figure S62. The optimized structures (left) and the calculated CD spectra for conformers (3 <i>S</i> ,6 <i>R</i> ,9 <i>R</i> )-4b in MeOH at M06-2X/def2TZVP level (right). $\sigma=0.30$ eV. ....                             | 41 |
| Table S8. Relative free energies <sup>a</sup> and equilibrium populations <sup>b</sup> of conformers for (3 <i>R</i> ,6 <i>R</i> ,9 <i>R</i> )-4c <sup>c</sup> 41                                                              | 41 |
| Figure S63. The optimized structures (left) and the calculated CD spectra for conformers (3 <i>R</i> ,6 <i>R</i> ,9 <i>R</i> )-4c in MeOH at M06-2X/def2TZVP level (right). $\sigma=0.30$ eV. ....                             | 43 |
| Table S9. Relative free energies <sup>a</sup> and equilibrium populations <sup>b</sup> of conformers for (3 <i>R</i> ,6 <i>S</i> ,9 <i>S</i> )-4d <sup>c</sup> .                                                               | 43 |

|                                                                                                                                                                                                                                                    |    |
|----------------------------------------------------------------------------------------------------------------------------------------------------------------------------------------------------------------------------------------------------|----|
| Figure S64. The optimized structures (left) and the calculated CD spectra for conformers (3 <i>R</i> ,6 <i>S</i> ,9 <i>S</i> )-4d in MeOH at M06-2X/def2TZVP level (right). $\sigma=0.30$ eV. ....                                                 | 44 |
| Figure S65. Correlation plots of experimental $^{13}\text{C}$ NMR chemical shifts versus the corresponding calculated data for (3 <i>S</i> , 6 <i>S</i> , 9 <i>S</i> )-4a and (3 <i>S</i> , 6 <i>R</i> , 9 <i>R</i> )-4b .....                     | 45 |
| Figure S66. DP4+ probabilities (%) for conformers of (3 <i>S</i> , 6 <i>S</i> , 9 <i>S</i> )-4a (isomer 1) and (3 <i>S</i> , 6 <i>R</i> , 9 <i>R</i> )-4b (isomer 2). ....                                                                         | 46 |
| Table S10. Relative free energies <sup>a</sup> and equilibrium populations <sup>b</sup> of conformers for (3 <i>S</i> , 6 <i>R</i> , 8 <i>S</i> , 9 <i>S</i> )-5a <sup>c</sup> .....                                                               | 46 |
| Figure S67. The optimized structure of conformers for (3 <i>S</i> ,6 <i>R</i> ,8 <i>S</i> ,9 <i>S</i> )-5a in MeOH at B3LYP/6-31G (d) level.....                                                                                                   | 47 |
| Table S11. Relative free energies <sup>a</sup> and equilibrium populations <sup>b</sup> of conformers for (3 <i>S</i> ,6 <i>S</i> ,8 <i>R</i> ,9 <i>R</i> )-5b <sup>c</sup> .....                                                                  | 47 |
| Figure S68. The optimized structure of conformers for (3 <i>S</i> ,6 <i>S</i> ,8 <i>R</i> ,9 <i>R</i> )-5b in MeOH at B3LYP/6-31G (d) level.....                                                                                                   | 48 |
| Figure S69. Correlation plots of experimental $^{13}\text{C}$ NMR chemical shifts versus the corresponding calculated data for (3 <i>S</i> ,6 <i>R</i> ,8 <i>S</i> ,9 <i>S</i> )-5a and (3 <i>S</i> ,6 <i>S</i> ,8 <i>R</i> ,9 <i>R</i> )-5b. .... | 48 |
| Figure S70. DP4+ probabilities (%) for conformers of (3 <i>S</i> ,6 <i>R</i> ,8 <i>S</i> ,9 <i>S</i> )-5a (isomer 1) and (3 <i>S</i> ,6 <i>S</i> ,8 <i>R</i> ,9 <i>R</i> )-5b (isomer 2). ....                                                     | 49 |
| Table S12. Relative free energies <sup>a</sup> and equilibrium populations <sup>b</sup> of conformers for (3 <i>S</i> ,6 <i>S</i> ,8 <i>R</i> ,9 <i>S</i> )-6a <sup>c</sup> .....                                                                  | 49 |
| Figure S71. The optimized structure of conformers for (3 <i>S</i> ,6 <i>S</i> ,8 <i>R</i> ,9 <i>S</i> )-6a in MeOH at B3LYP/6-31G (d) level.....                                                                                                   | 50 |
| Table S13. Relative free energies <sup>a</sup> and equilibrium populations <sup>b</sup> of conformers for (3 <i>S</i> ,6 <i>R</i> ,8 <i>S</i> ,9 <i>R</i> )-6b <sup>c</sup> .....                                                                  | 50 |
| Figure S72. The optimized structure of conformers for (3 <i>S</i> ,6 <i>R</i> ,8 <i>S</i> ,9 <i>R</i> )-6b in MeOH at B3LYP/6-31G (d) level.....                                                                                                   | 51 |
| Figure S73. Correlation plots of experimental $^{13}\text{C}$ NMR chemical shifts versus the corresponding calculated data for (3 <i>S</i> ,6 <i>S</i> ,8 <i>R</i> ,9 <i>S</i> )-6a and (3 <i>S</i> ,6 <i>R</i> ,8 <i>S</i> ,9 <i>R</i> )-6b ..... | 51 |
| Figure S74. DP4+ probabilities (%) for conformers of (3 <i>S</i> ,6 <i>S</i> ,8 <i>R</i> ,9 <i>S</i> )-6a (isomer 1) and (3 <i>S</i> ,6 <i>R</i> ,8 <i>S</i> ,9 <i>R</i> )-6b (isomer 2). ....                                                     | 52 |
| Figure S74. Proposed biosynthetic pathway of compounds 1–7. ....                                                                                                                                                                                   | 52 |

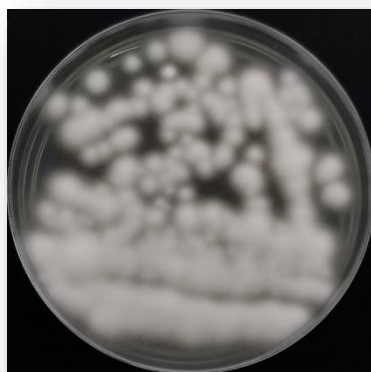

CAACCCTTATGTGACATACCAATCGTTGCTTCGGCGGACTCGCCCCGGTGTCCGGCAGGCCCTCGCGG  
 CCGGCCGCGACCCGGATCCAGGCGGACGCCGGAGACCATCCAAAACTCTTTGTATTCTAGCAAGTCT  
 TCTGAATGAGCCGCAAGGCAACACAAATGAATCAAACTTTCAACAACGGATCTCTTGGTTCTGGCATC  
 GATGACTAGCGCAGCGAAAGGAGATAACTAATGTGAATTGCACACATCCGCGAACTTGAACACACTGG  
 AGGCCCATAGCGGTCCCAACCAATCGCCCCGGTTGAGGAGGACGGGCAACGACTTGATTCTGTGGCTA  
 CCATGCAGGCACCCTTTTCGGCCGTGAAGCTTCACCCACAACCTTGCAATCAAAGACTCGATGGTTCCCG  
 GGATTCTGCAATTCGCTCATGATTGACATGACTTCAGCATTATTTAGCTTTGTACTGTAATGAAAAAGG  
 AAAGGAACGTTTAATTTATTGGGCTTGAAAAATCCGATCAATACTCCACTCTTTTATTTCCCAAAAAAGAG  
 AATACTACTTGTATATAGTTACA

**Figure S1.** The colonies and the ITS rRNA sequences data of deep-sea-derived fungus  
*Lecanicillium fusisporum* GXIMD00542

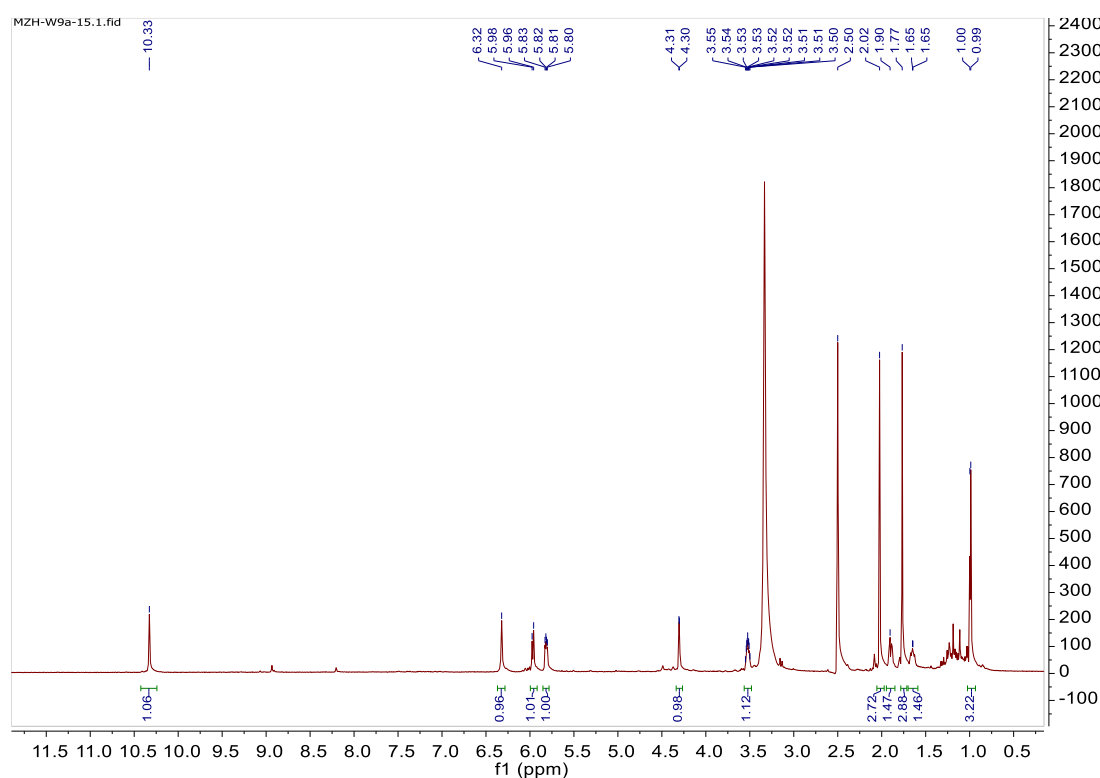

**Figure S2.**  $^1\text{H}$  NMR spectrum of **1**

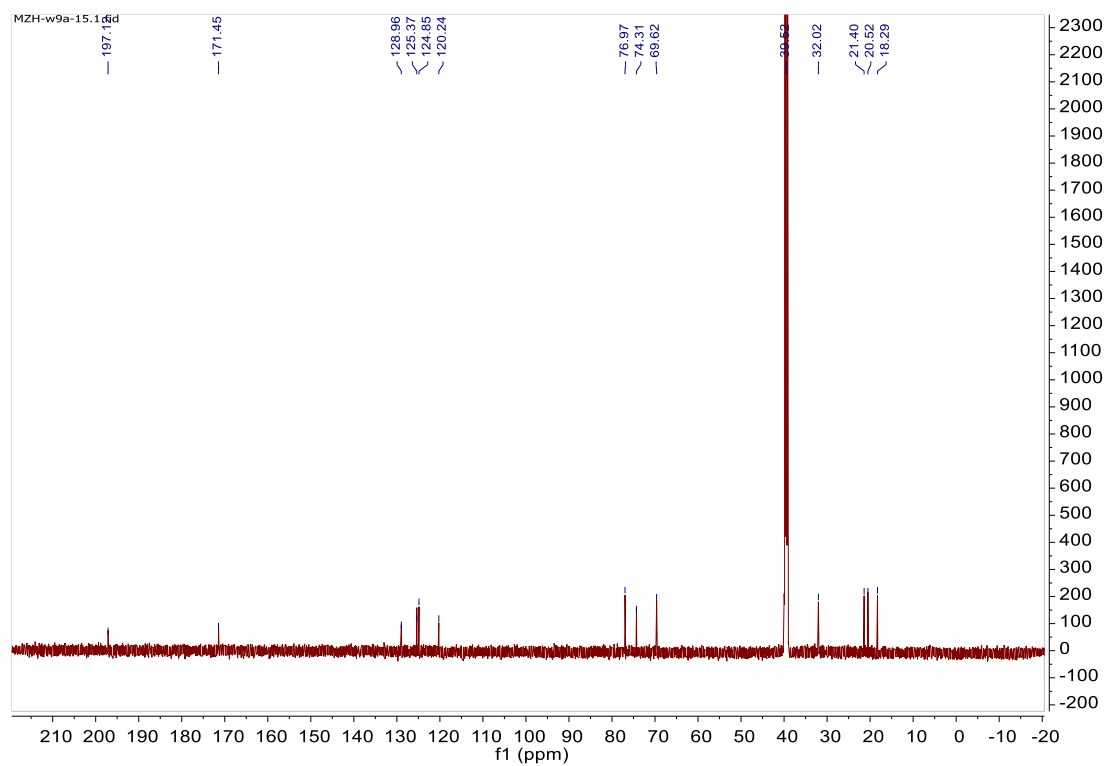

Figure S3.  $^{13}\text{C}$  NMR spectrum of **1**

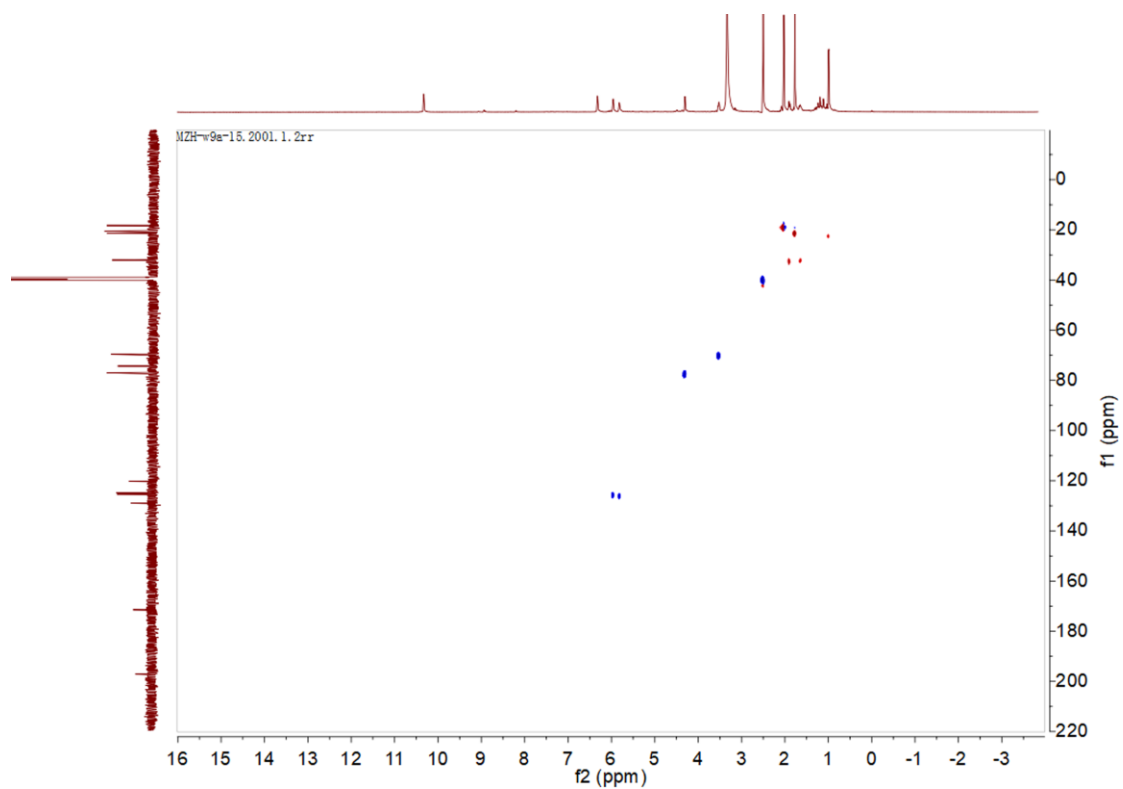

Figure S4. HSQC spectrum of **1**

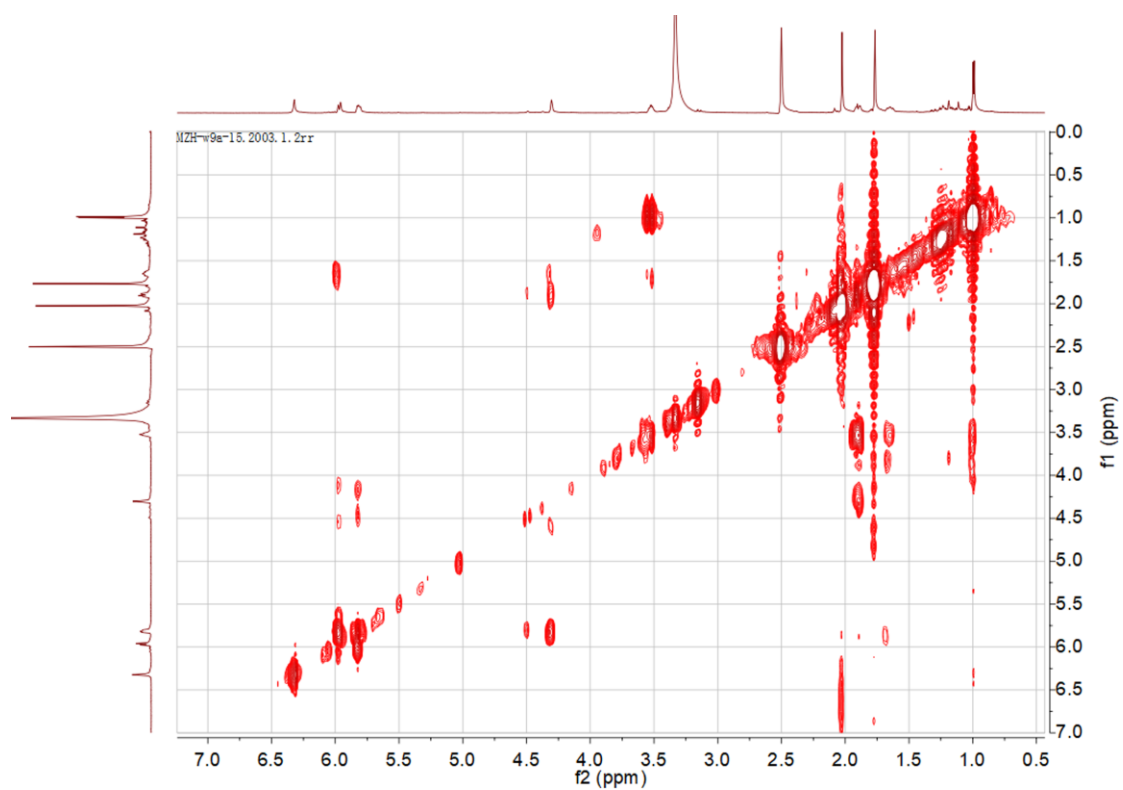

Figure S5.  $^1\text{H}$ - $^1\text{H}$  COSY spectrum of **1**

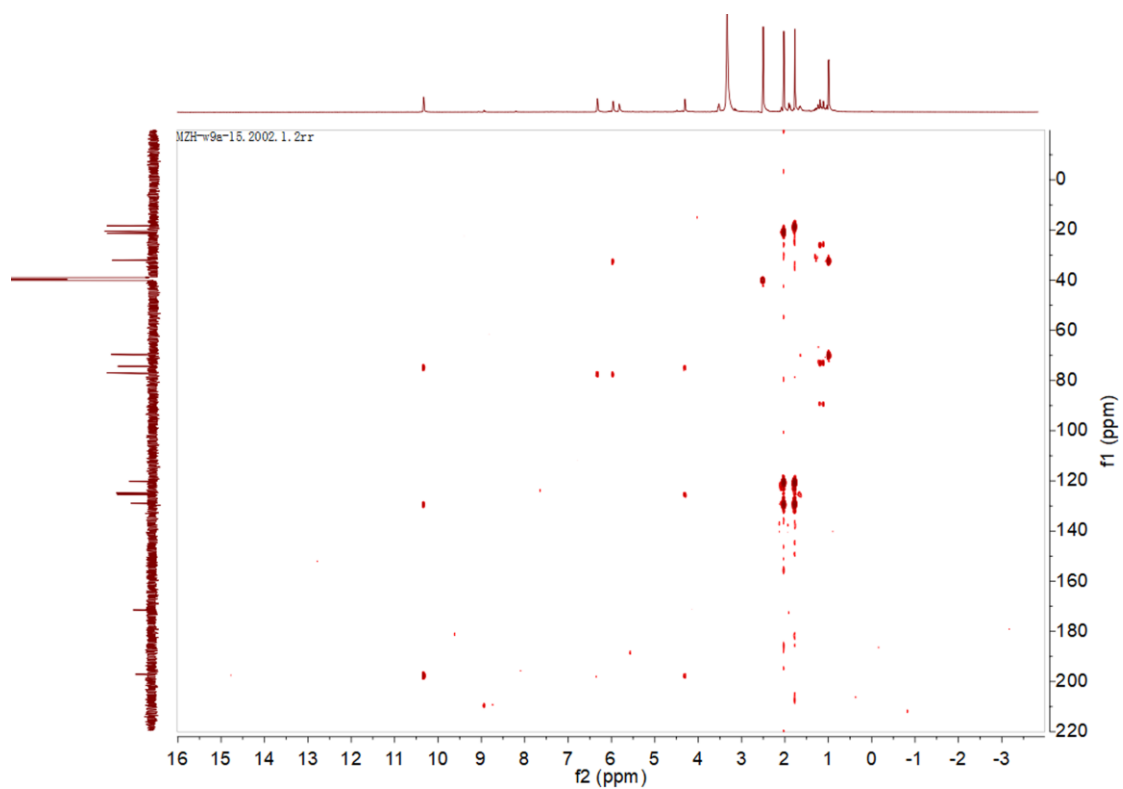

Figure S6. HMBC spectrum of **1**

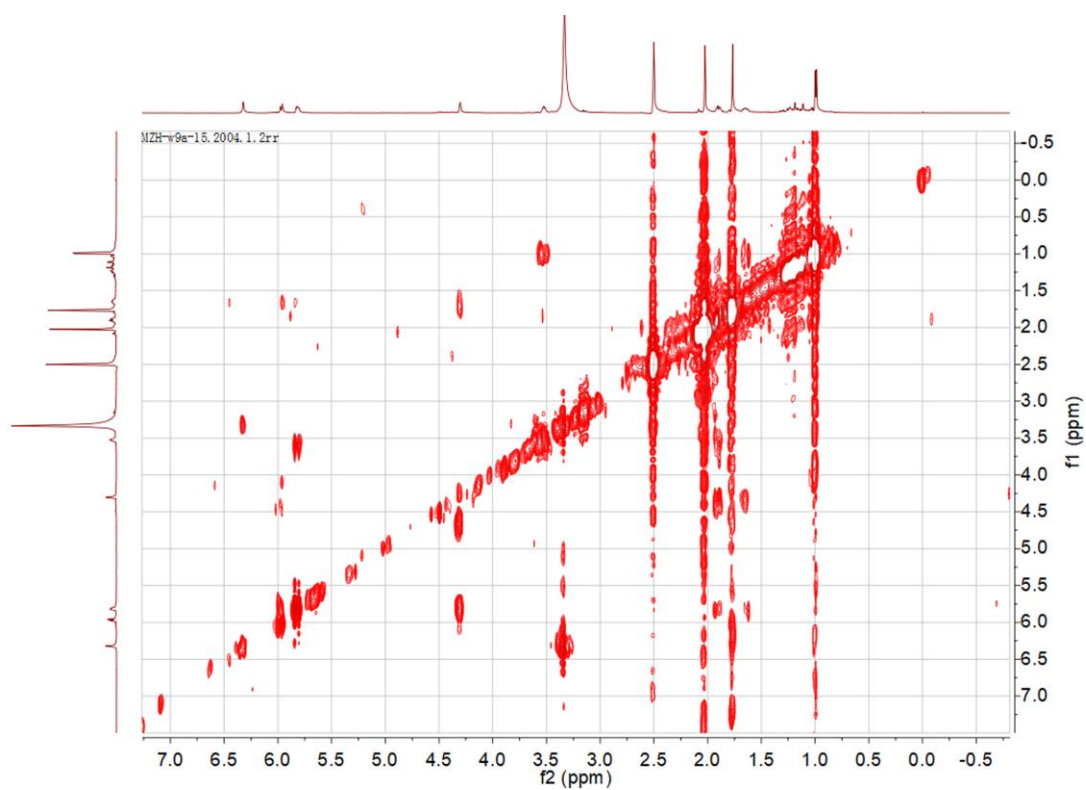

Figure S7. NOESY spectrum of **1**

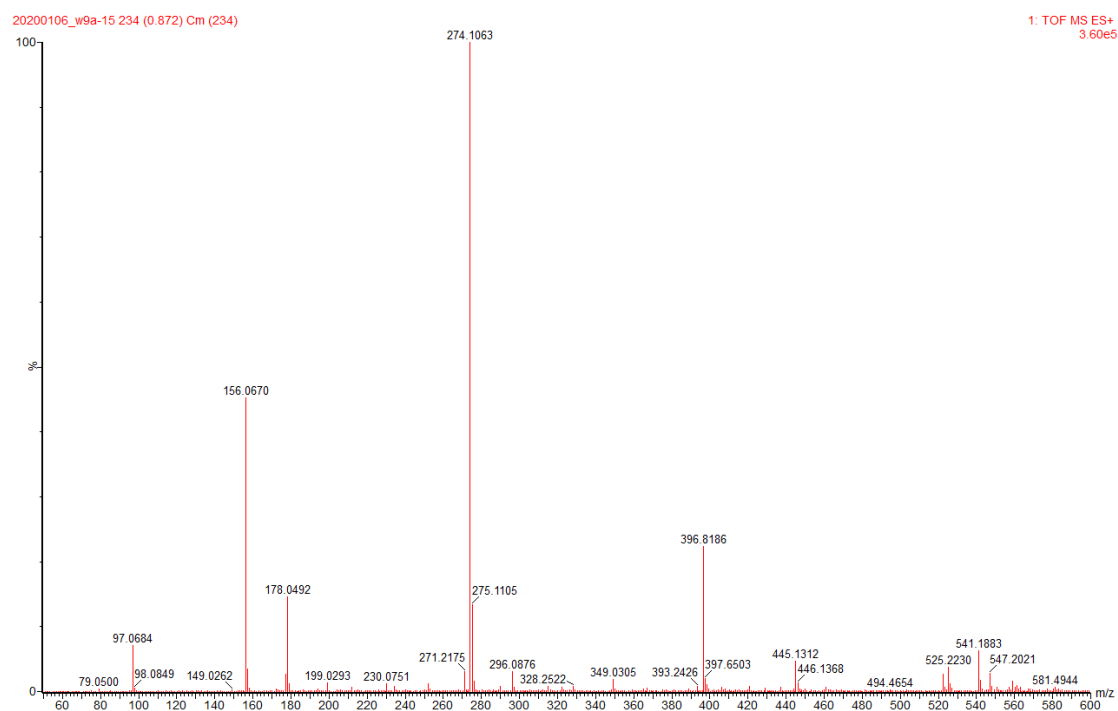

Figure S8. HR-ESI-MS spectrum of **1**



**Table S1.** Crystal data and structure refinement for compound **1**

|                                             |                                                               |
|---------------------------------------------|---------------------------------------------------------------|
| Empirical formula                           | C <sub>26</sub> H <sub>36</sub> N <sub>2</sub> O <sub>9</sub> |
| Formula weight                              | 520.57                                                        |
| Temperature/K                               | 100.00(10)                                                    |
| Crystal system                              | orthorhombic                                                  |
| Space group                                 | P2 <sub>1</sub> 2 <sub>1</sub> 2 <sub>1</sub>                 |
| a/Å                                         | 11.32560(10)                                                  |
| b/Å                                         | 12.19970(10)                                                  |
| c/Å                                         | 18.5233(2)                                                    |
| α/°                                         | 90                                                            |
| β/°                                         | 90                                                            |
| γ/°                                         | 90                                                            |
| Volume/Å <sup>3</sup>                       | 2559.34(4)                                                    |
| Z                                           | 4                                                             |
| ρ <sub>calc</sub> /cm <sup>3</sup>          | 1.351                                                         |
| μ/mm <sup>-1</sup>                          | 0.851                                                         |
| F(000)                                      | 1112.0                                                        |
| Crystal size/mm <sup>3</sup>                | 0.16 × 0.08 × 0.08                                            |
| Radiation                                   | Cu Kα (λ = 1.54184)                                           |
| 2θ range for data collection/°              | 8.678 to 148.214                                              |
| Index ranges                                | -13 ≤ h ≤ 12, -13 ≤ k ≤ 14, -22 ≤ l ≤ 22                      |
| Reflections collected                       | 14388                                                         |
| Independent reflections                     | 5046 [R <sub>int</sub> = 0.0182, R <sub>sigma</sub> = 0.0192] |
| Data/restraints/parameters                  | 5046/0/345                                                    |
| Goodness-of-fit on F <sup>2</sup>           | 1.045                                                         |
| Final R indexes [I > 2σ (I)]                | R <sub>1</sub> = 0.0266, wR <sub>2</sub> = 0.0702             |
| Final R indexes [all data]                  | R <sub>1</sub> = 0.0270, wR <sub>2</sub> = 0.0705             |
| Largest diff. peak/hole / e Å <sup>-3</sup> | 0.18/-0.27                                                    |
| Flack parameter                             | 0.03(4)                                                       |

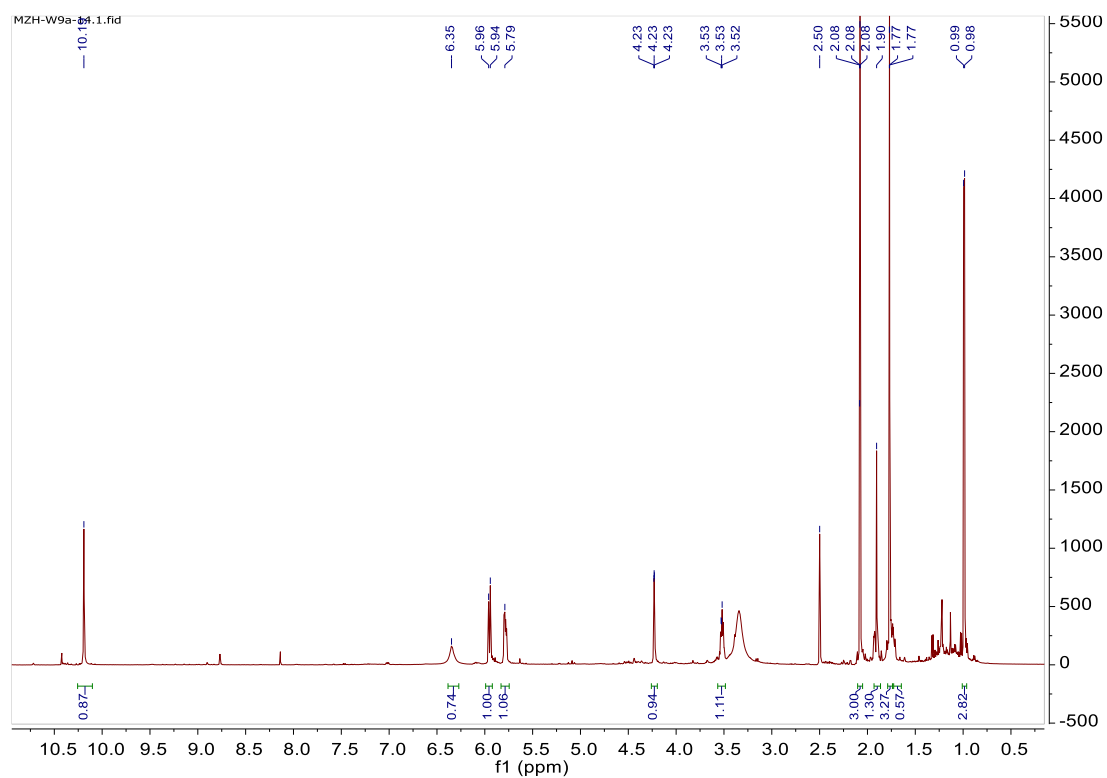

Figure S9.  $^1\text{H}$  NMR spectrum of 2

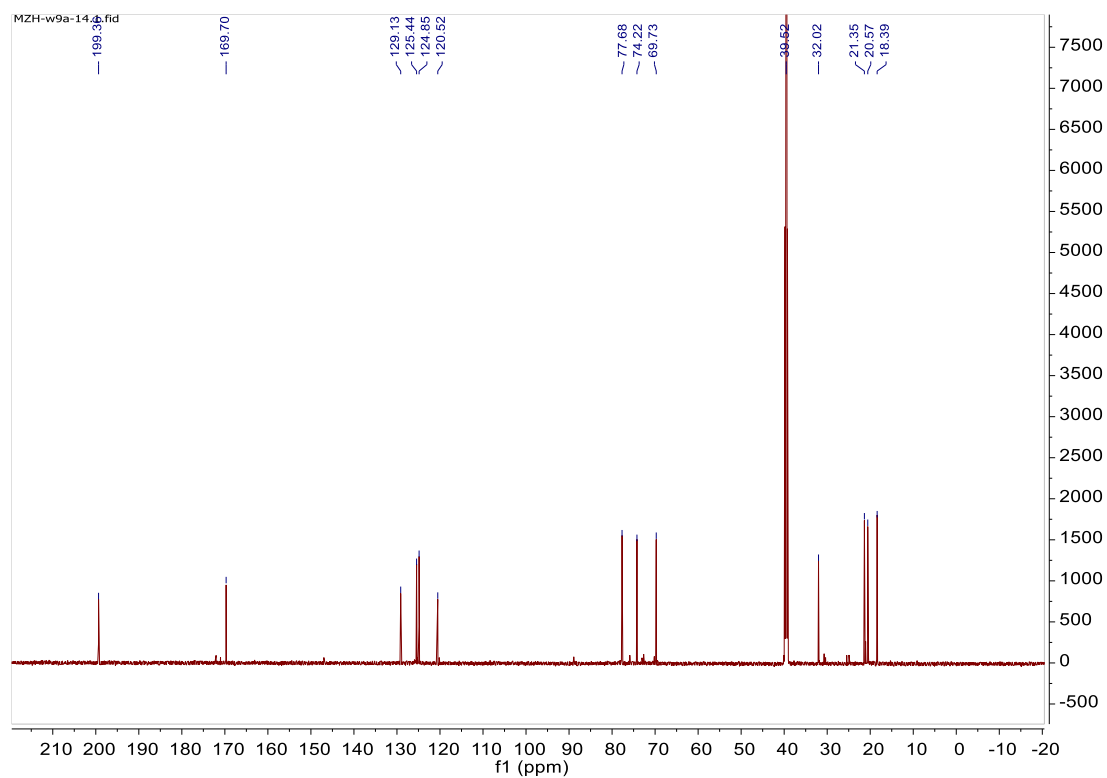

Figure S10.  $^{13}\text{C}$  NMR spectrum of 2

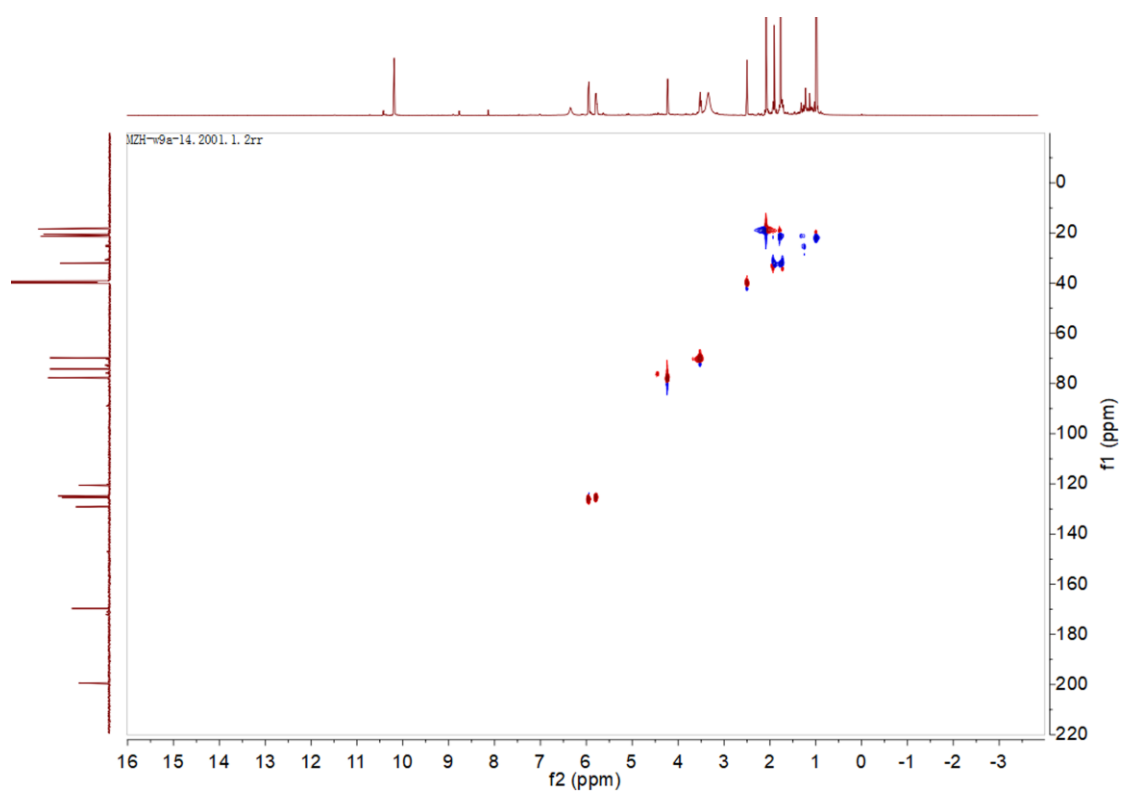

Figure S11. HSQC spectrum of 2

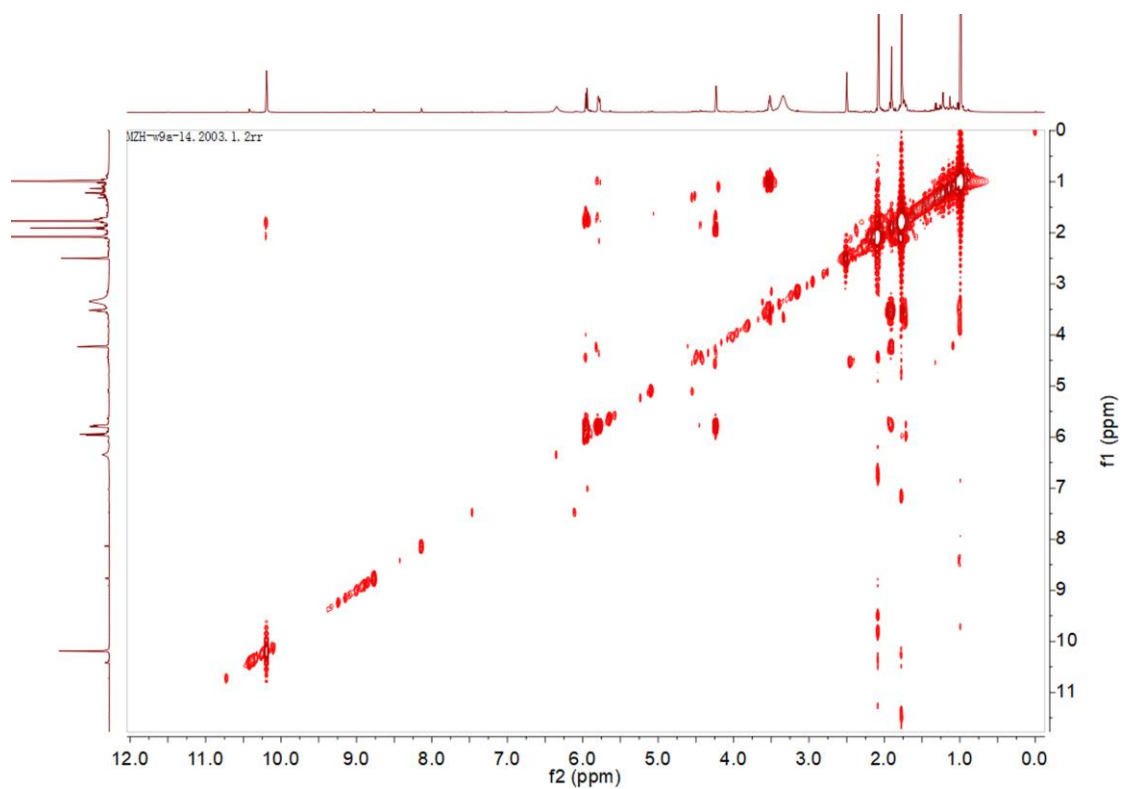

Figure S12.  $^1\text{H}$ - $^1\text{H}$  COSY spectrum of 2

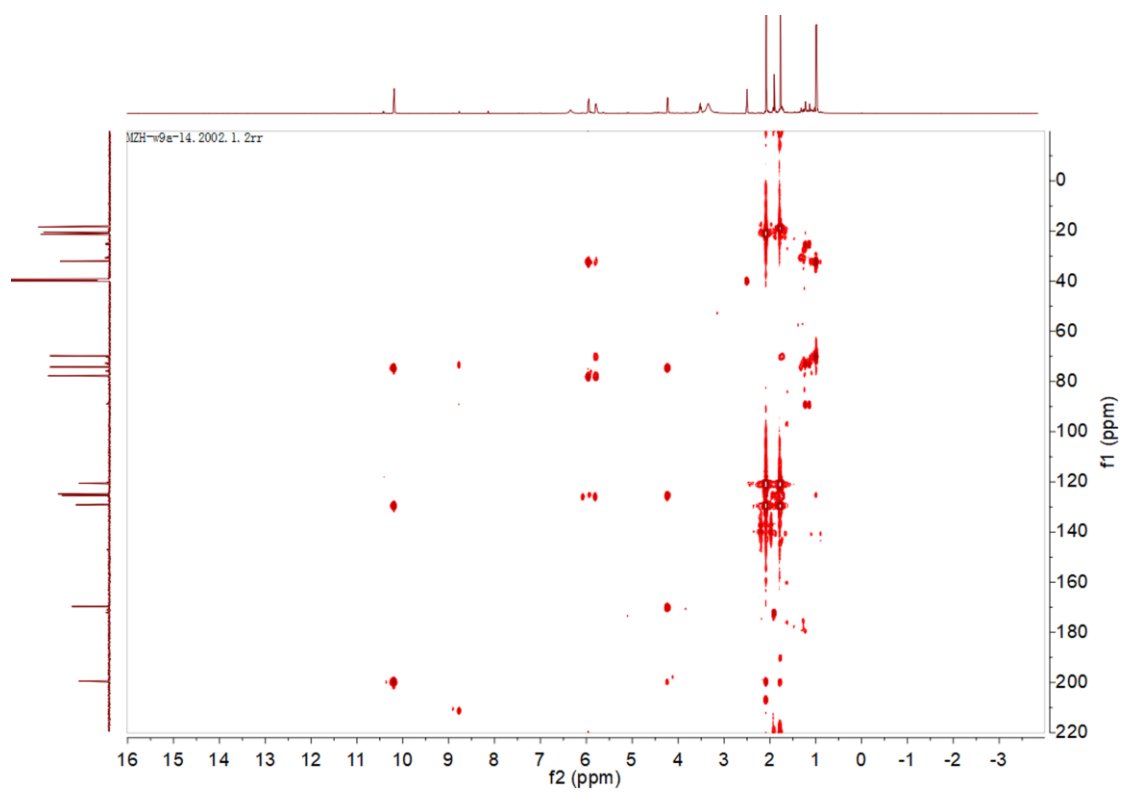

Figure S13. HMBC spectrum of 2

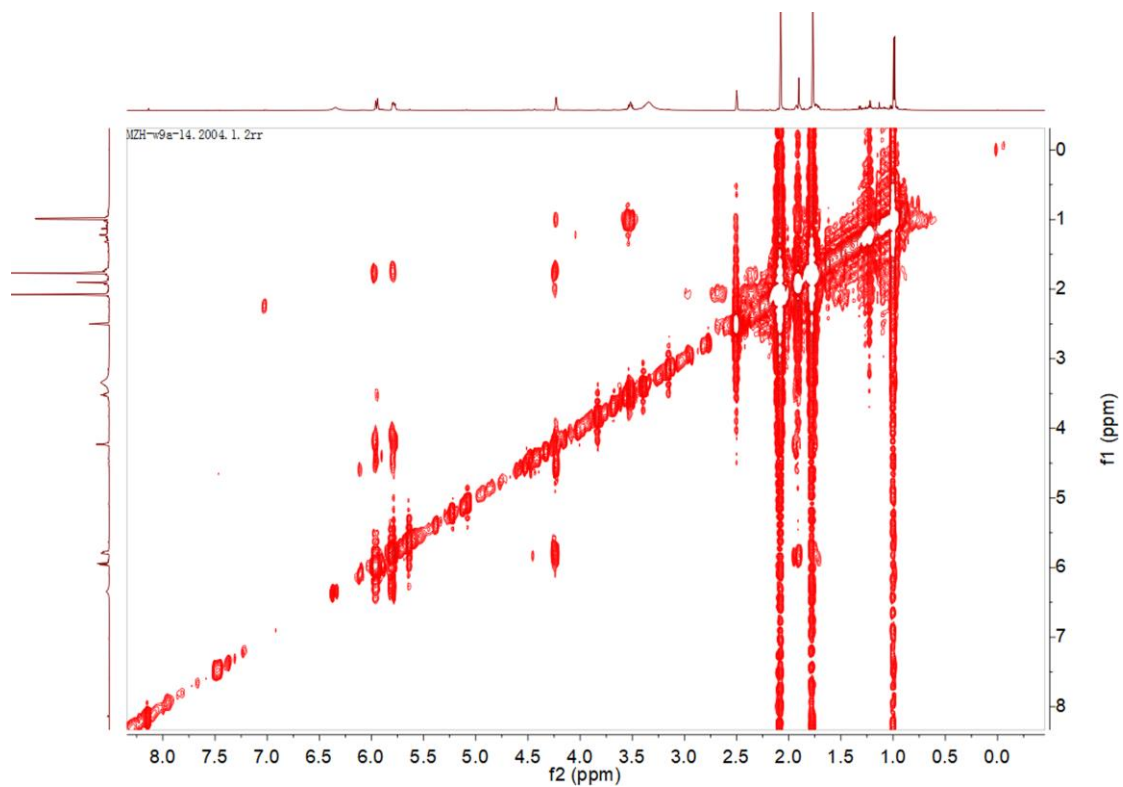

Figure S14. NOESY spectrum of 2

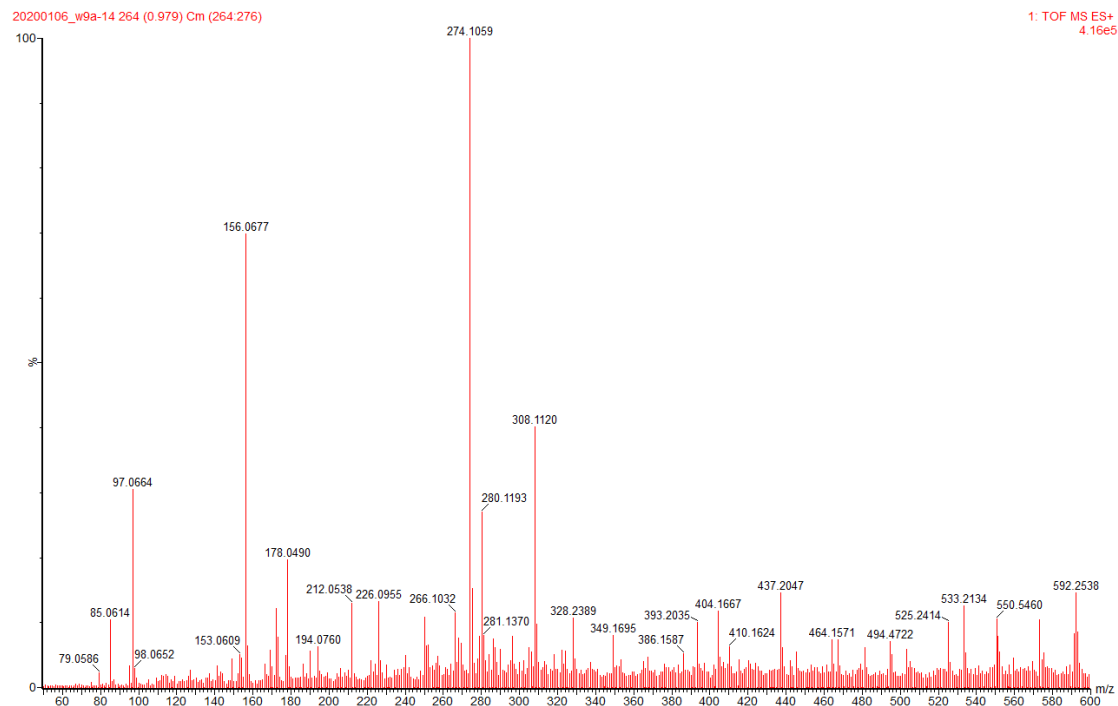

Figure S15. HR-ESI-MS spectrum of **2**

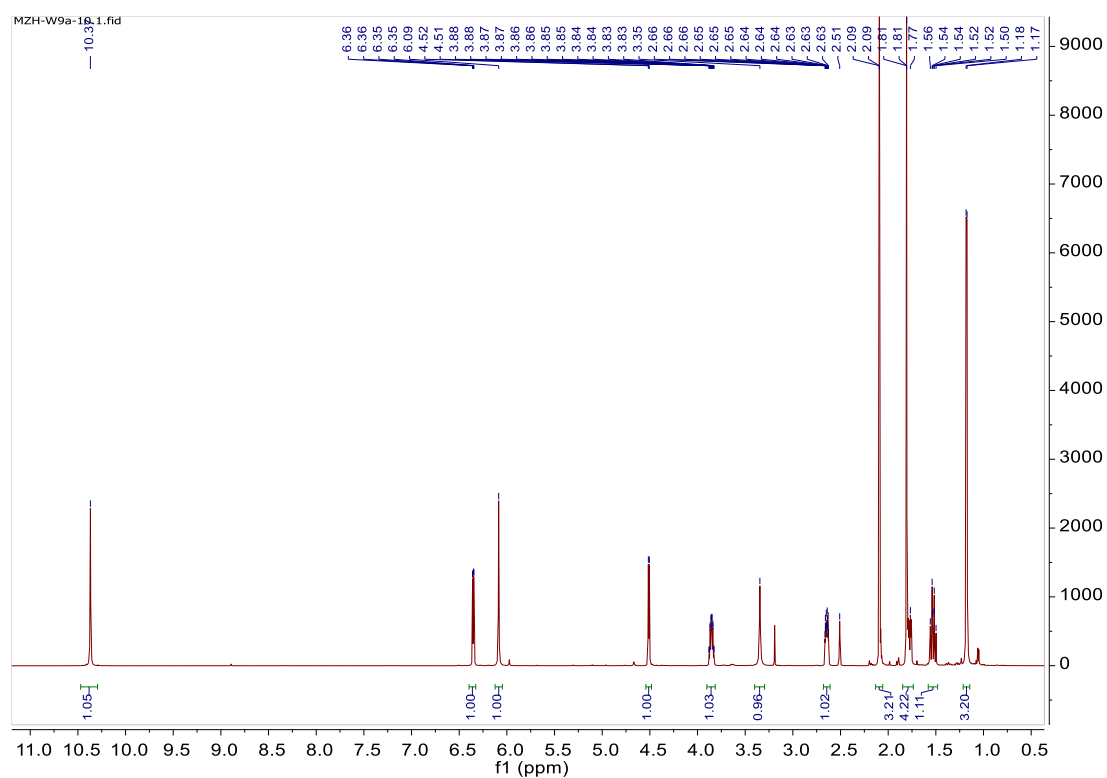

Figure S16.  $^1\text{H}$  NMR spectrum of **3**

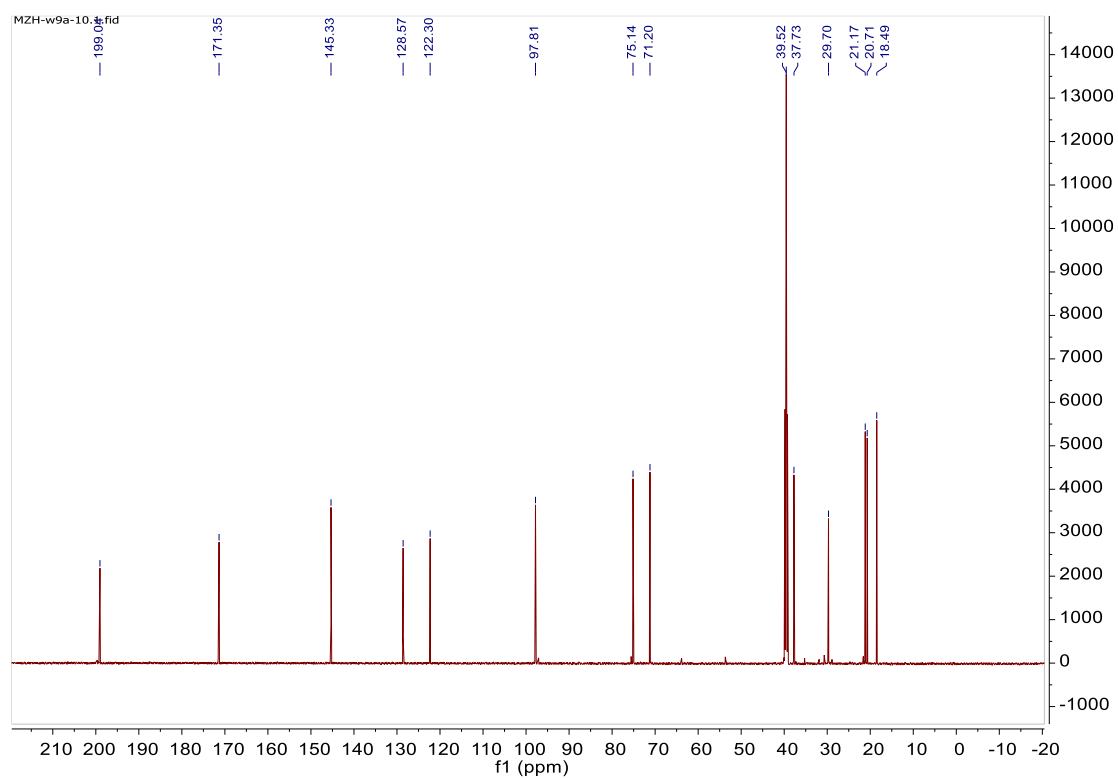

Figure S17.  $^{13}\text{C}$  NMR spectrum of **3**

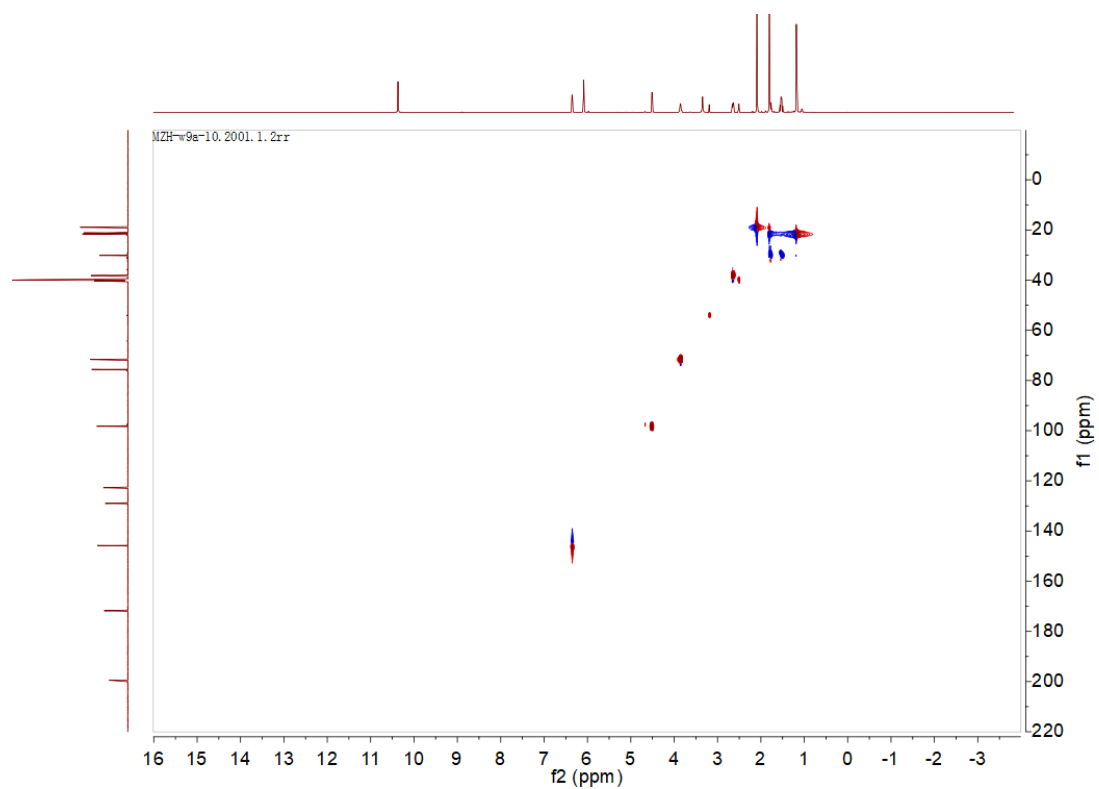

Figure S18. HSQC spectrum of **3**

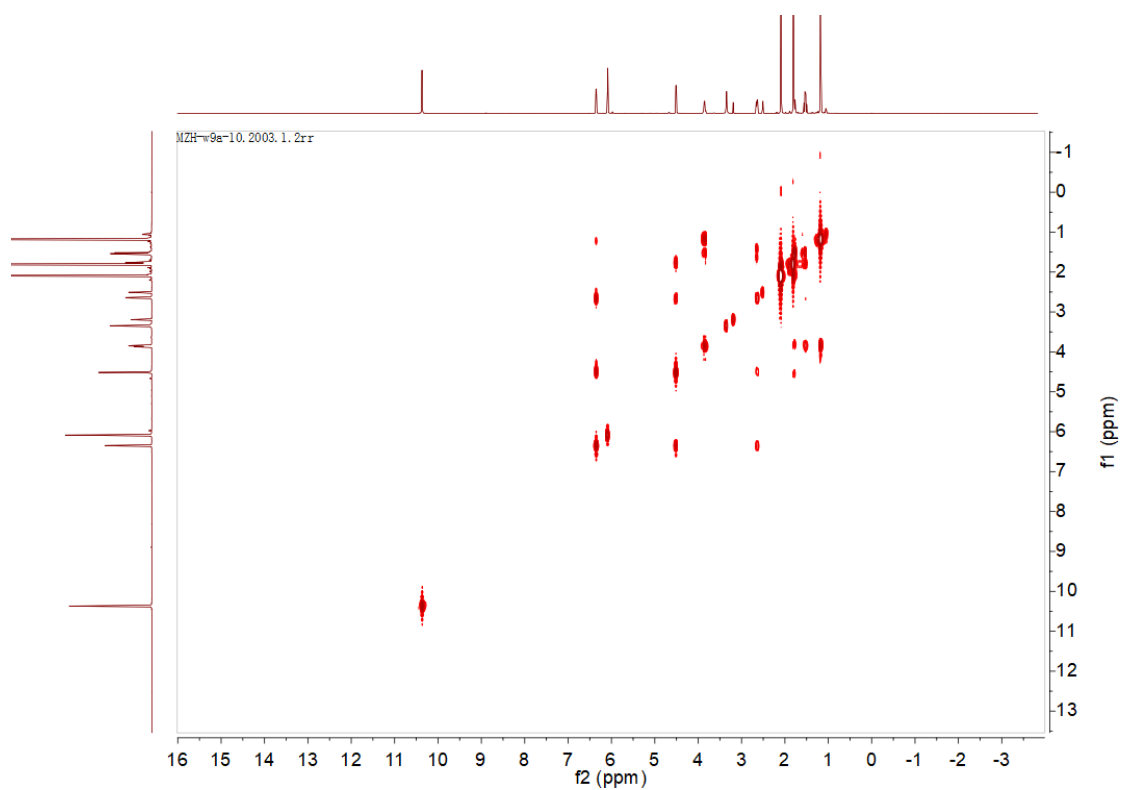

Figure S19.  $^1\text{H}$ - $^1\text{H}$  COSY spectrum of **3**

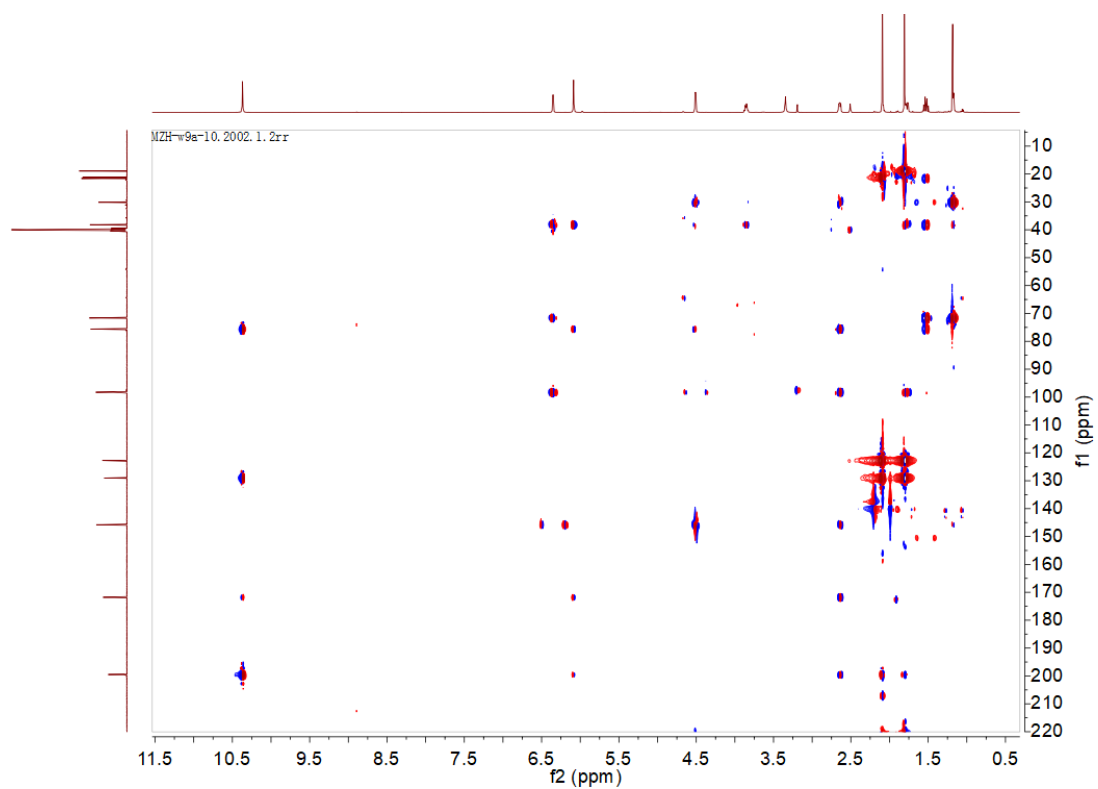

Figure S20. HMBC spectrum of **3**

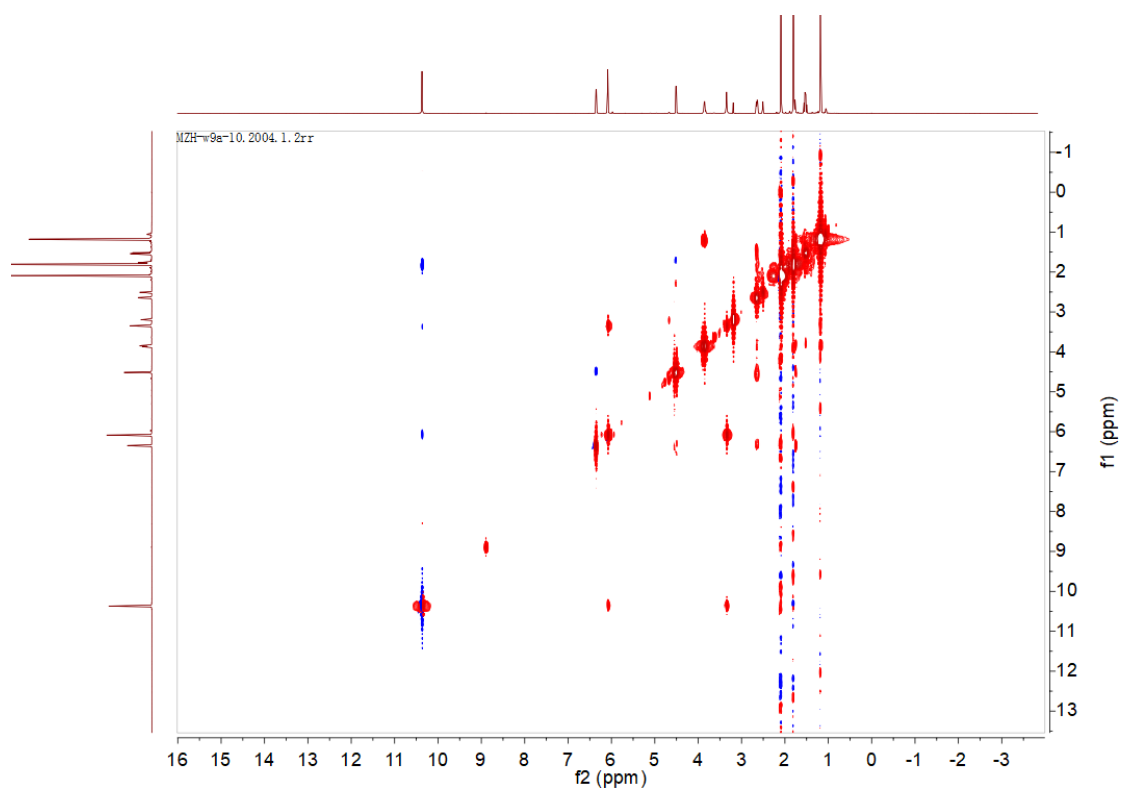

Figure S21. NOESY spectrum of **3**

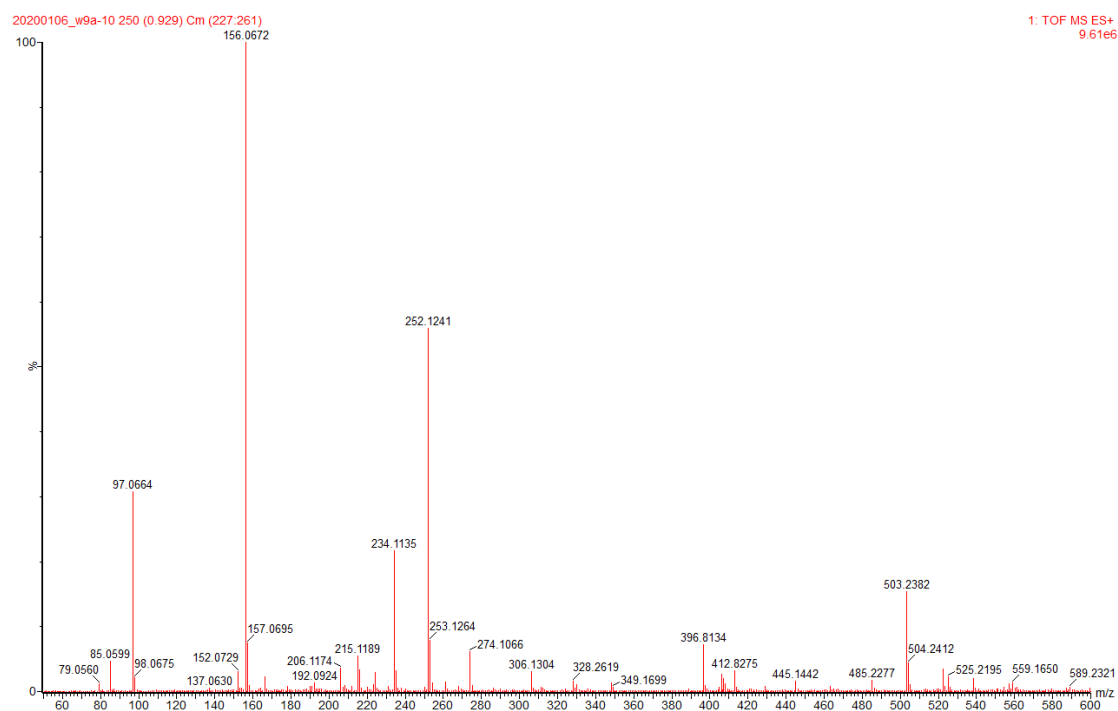

Figure S22. HR-ESI-MS spectrum of **3**



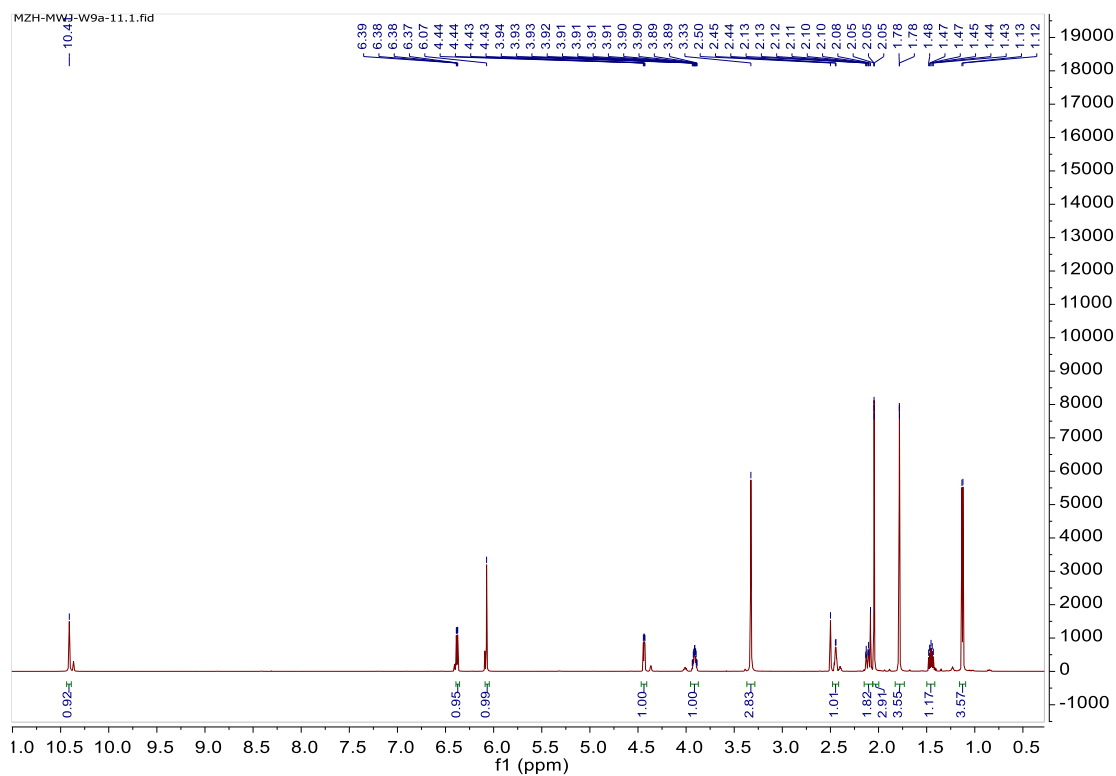

Figure S23.  $^1\text{H}$  NMR spectrum of **4**

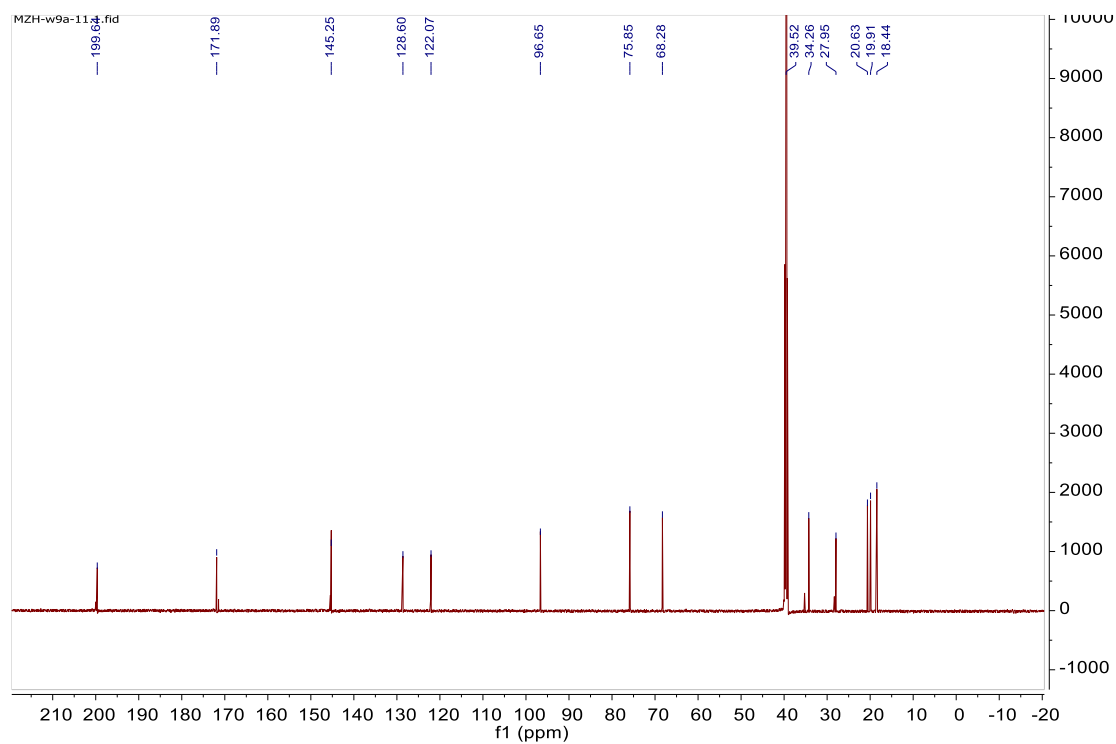

Figure S24.  $^{13}\text{C}$  NMR spectrum of **4**

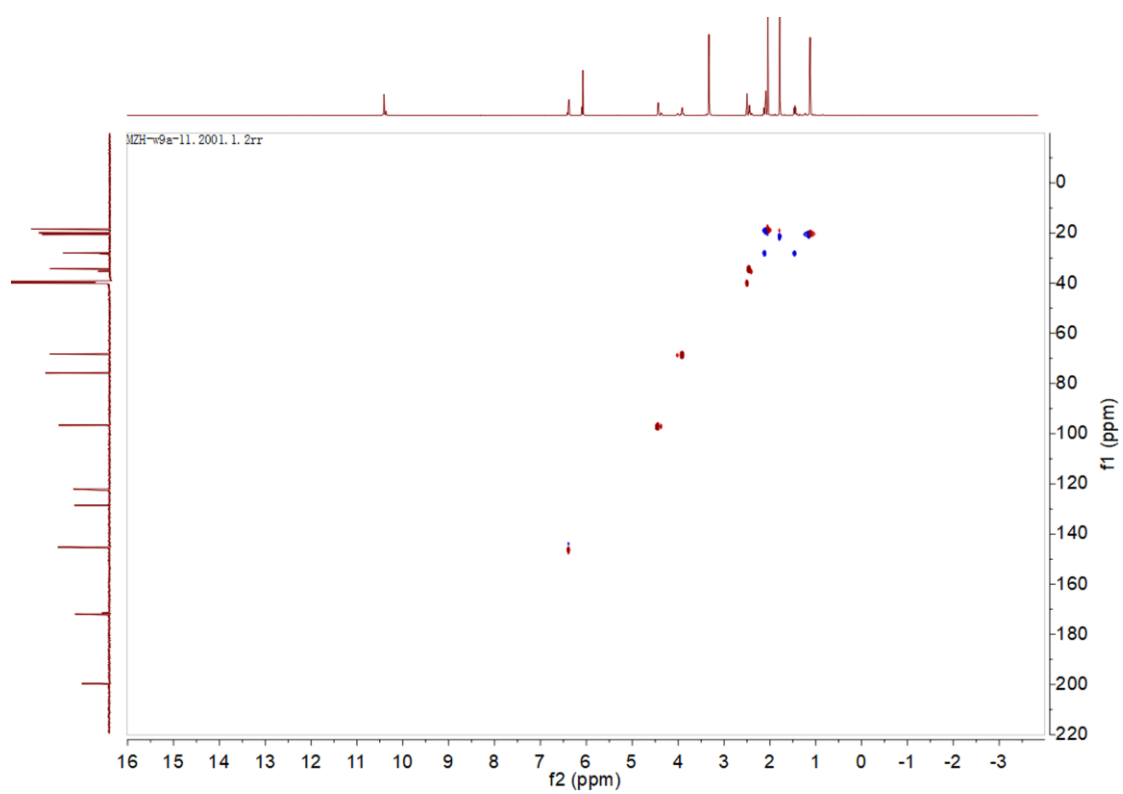

Figure S25. HSQC spectrum of 4

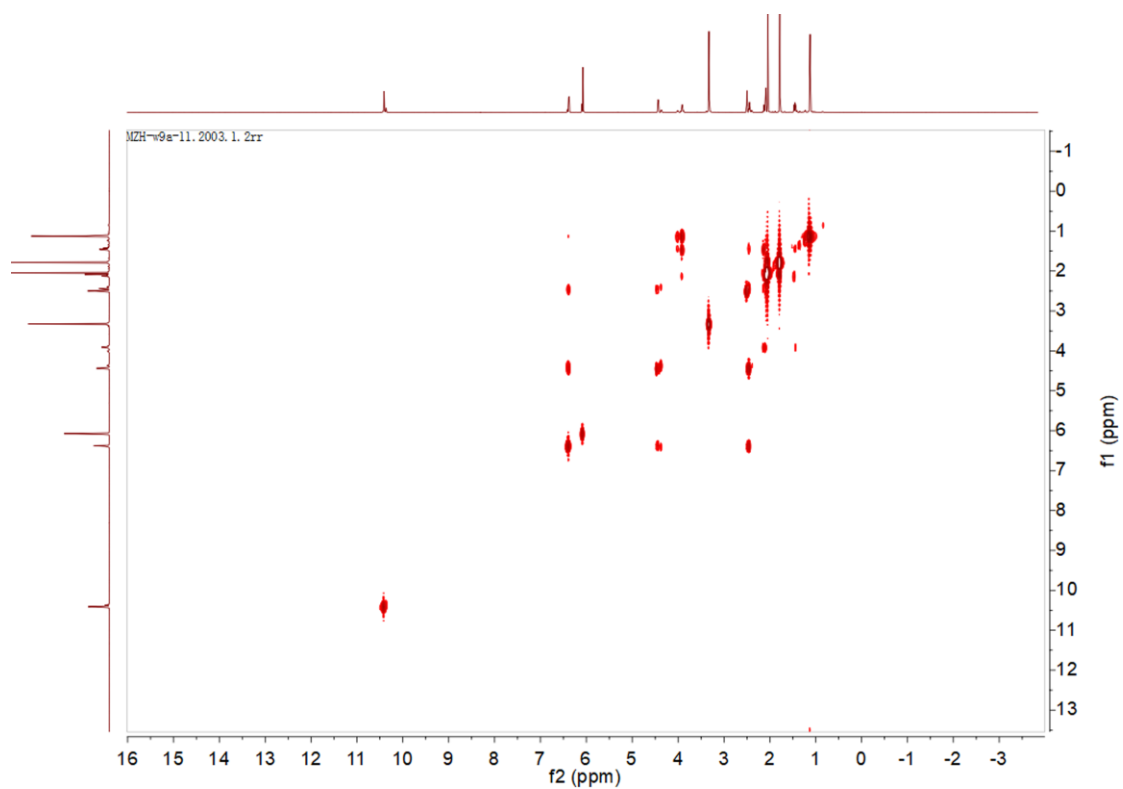

Figure S26.  $^1\text{H}$ - $^1\text{H}$  COSY spectrum of 4

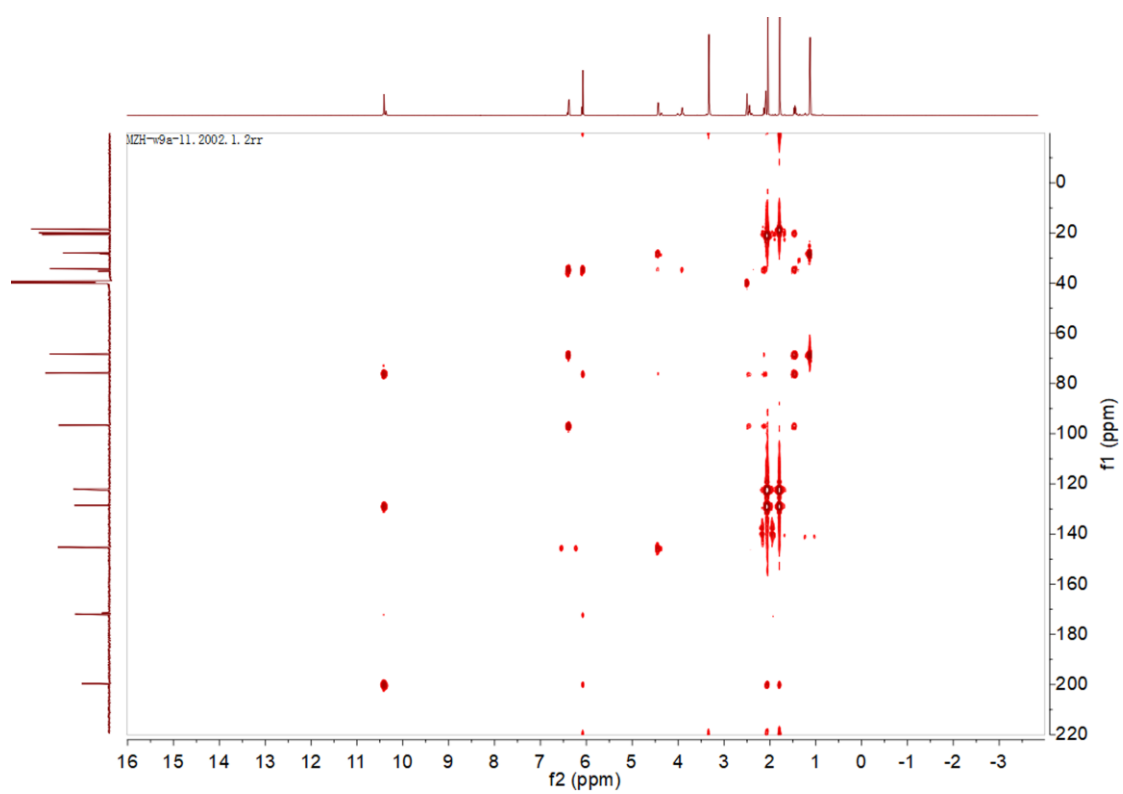

Figure S27. HMBC spectrum of **4**

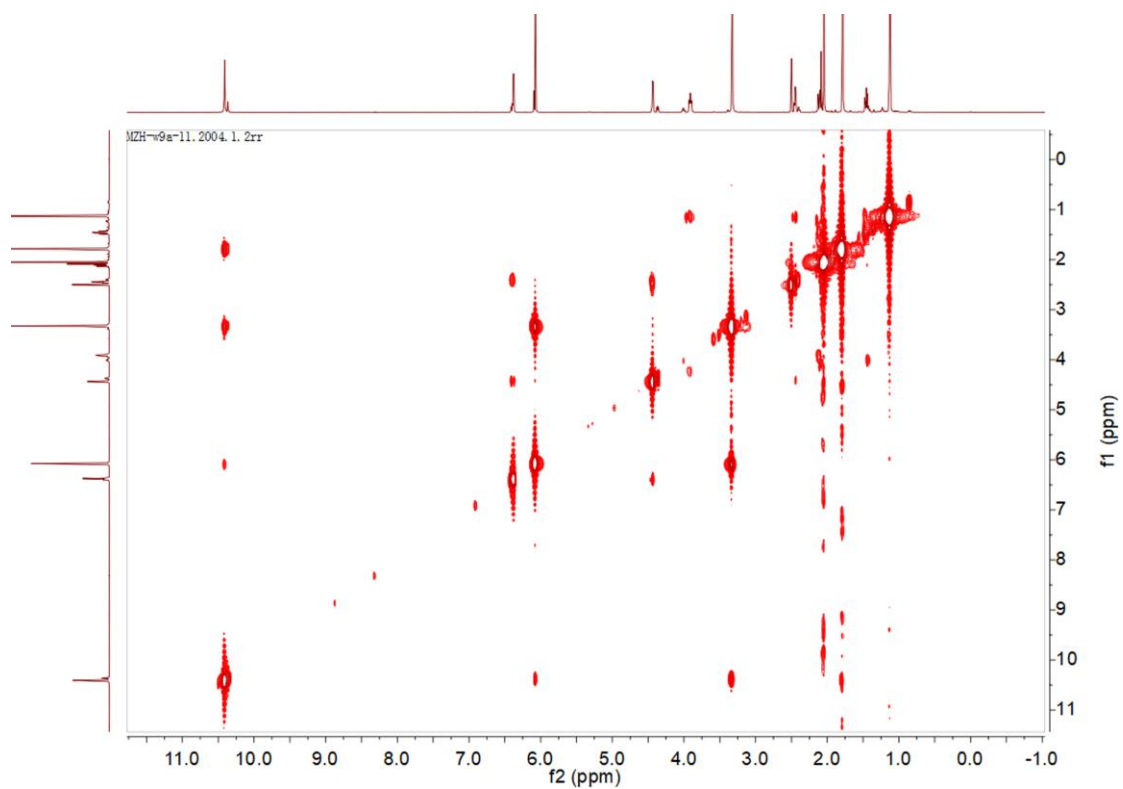

Figure S28. NOESY spectrum of **4**

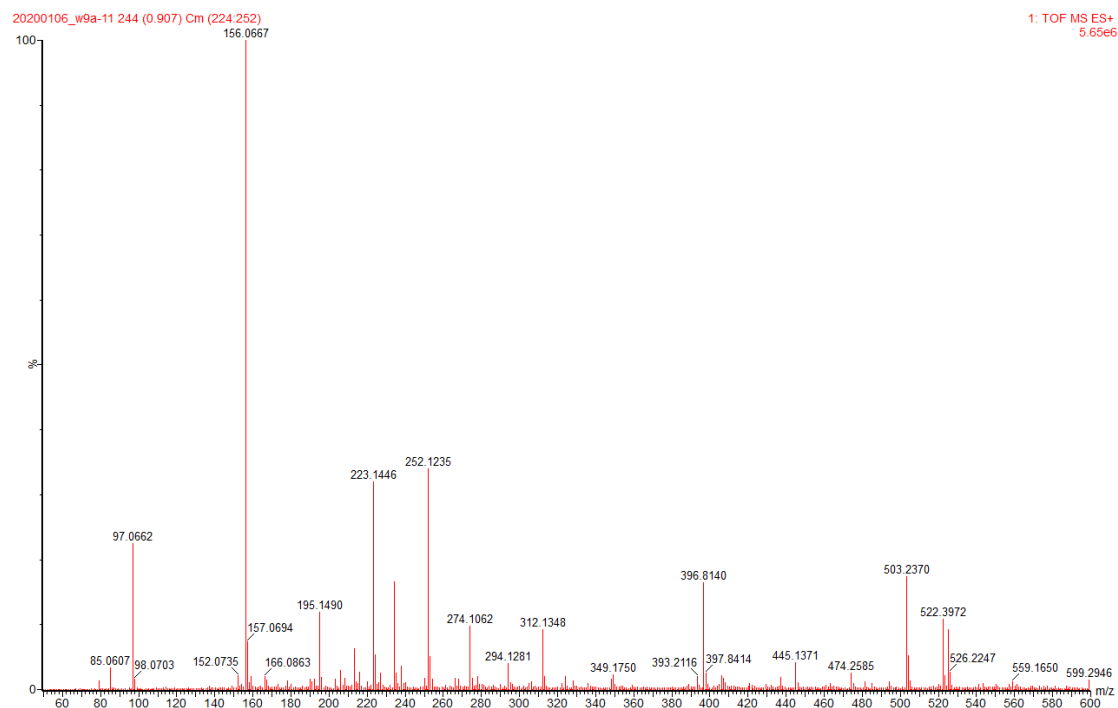

Figure S29. HR-ESI-MS spectrum of 4

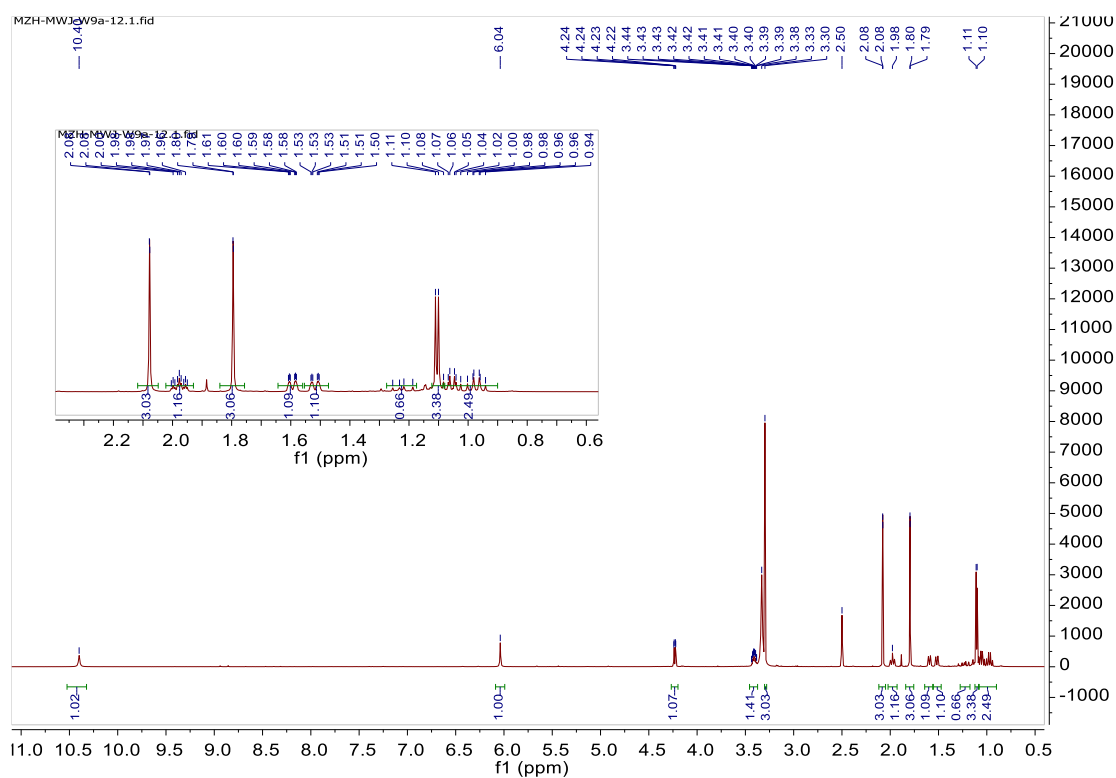

Figure S30. <sup>1</sup>H NMR spectrum of 5

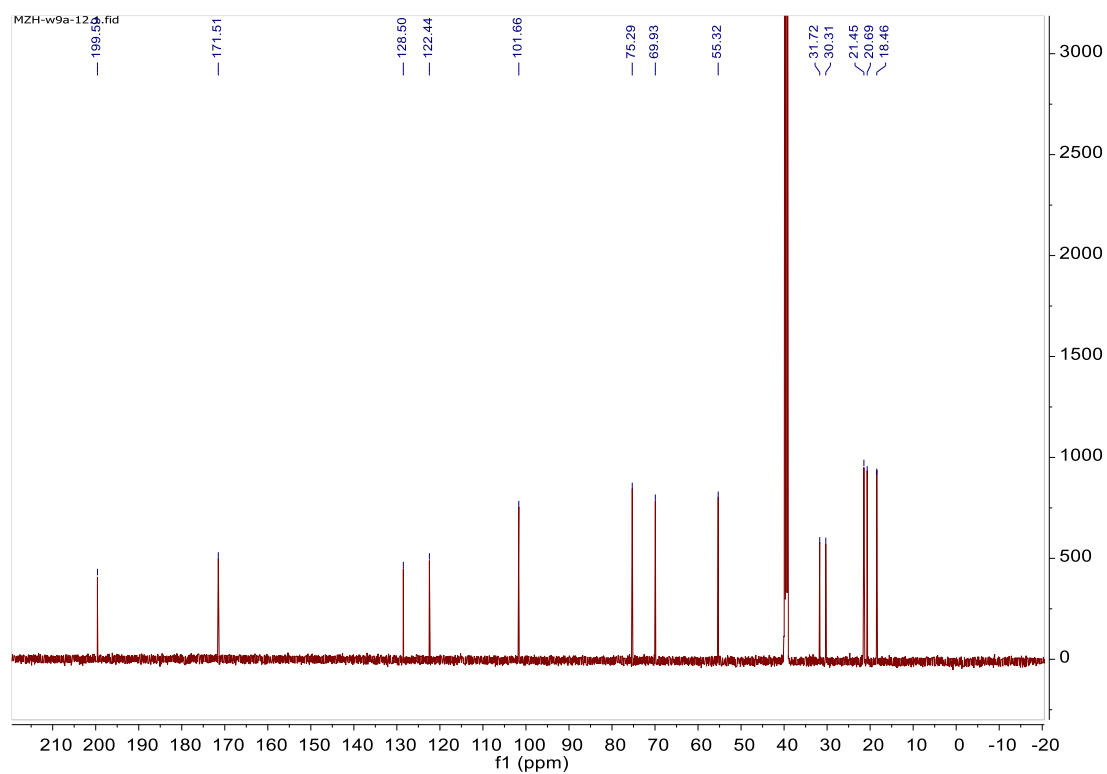

Figure S31.  $^{13}\text{C}$  NMR spectrum of 5

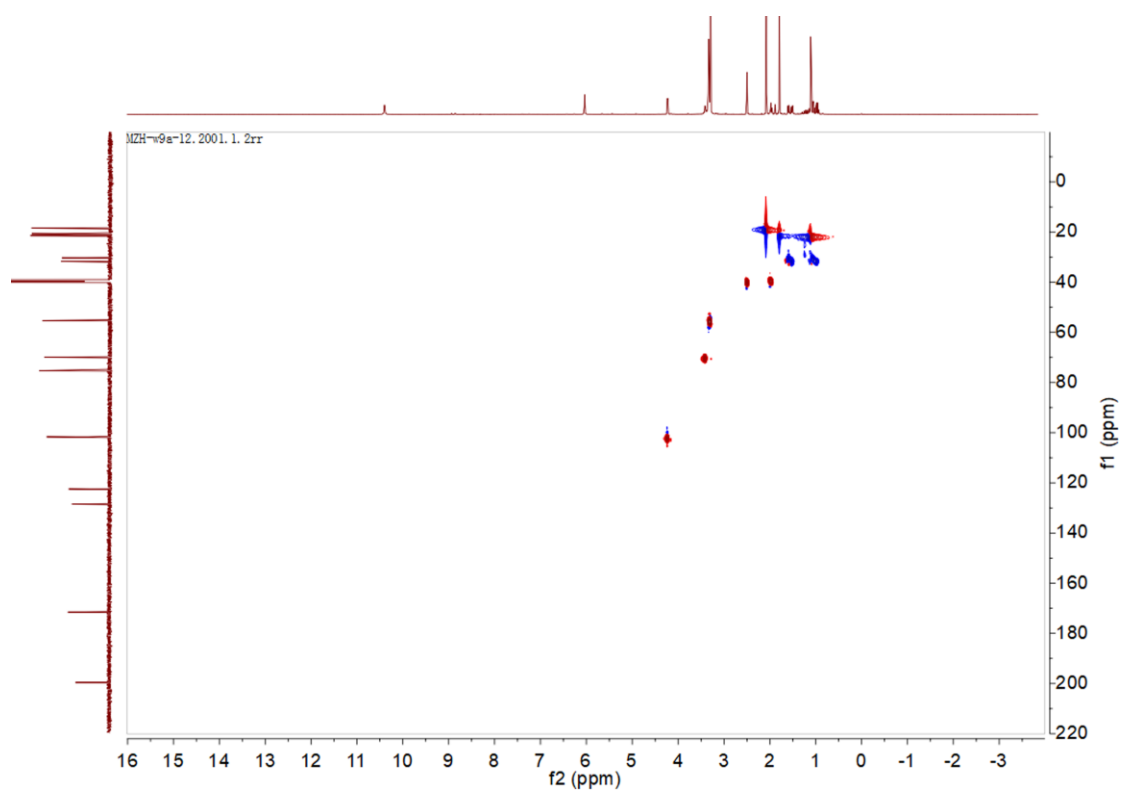

Figure S32. HSQC spectrum of 5

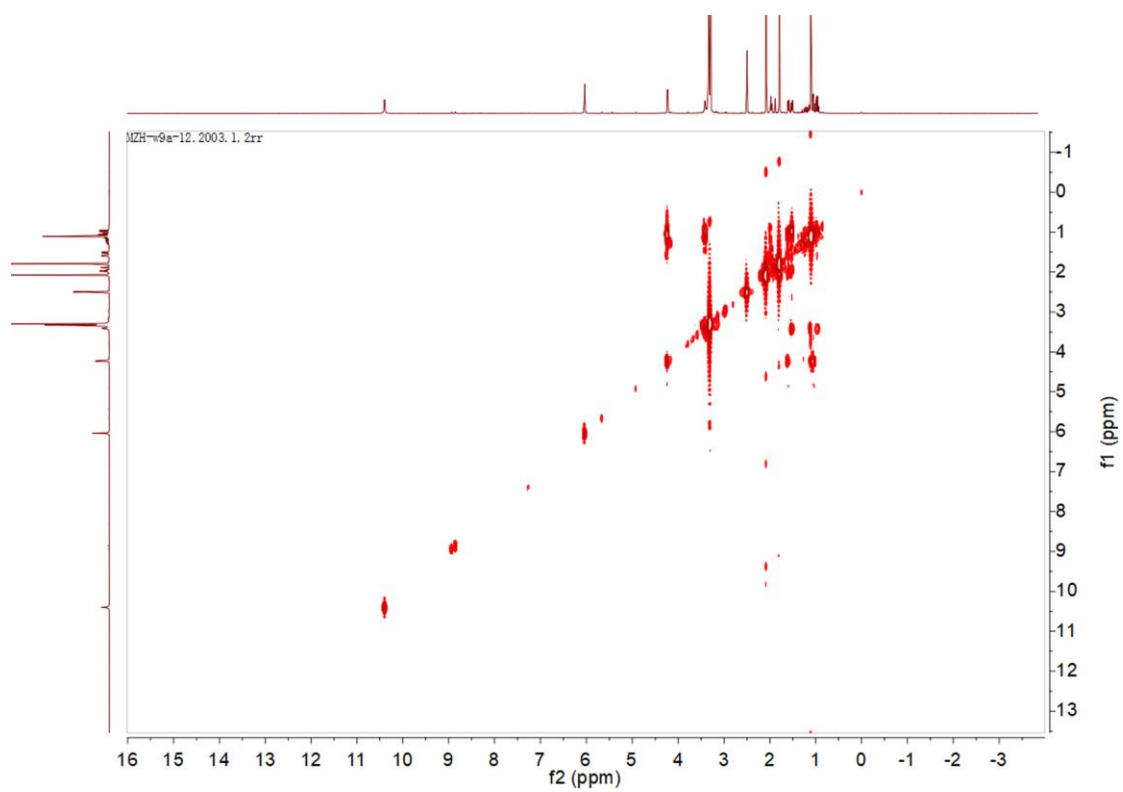

Figure S33.  $^1\text{H}$ - $^1\text{H}$  COSY spectrum of **5**

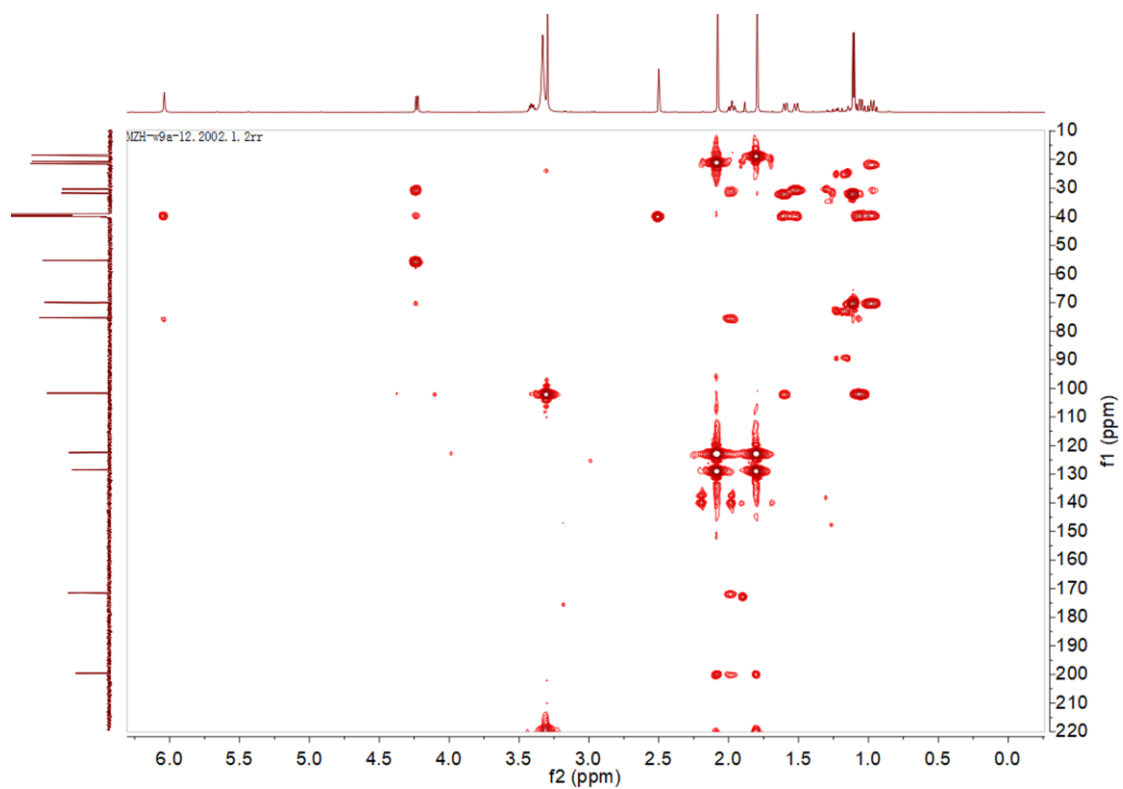

Figure S34. HMBC spectrum of **5**

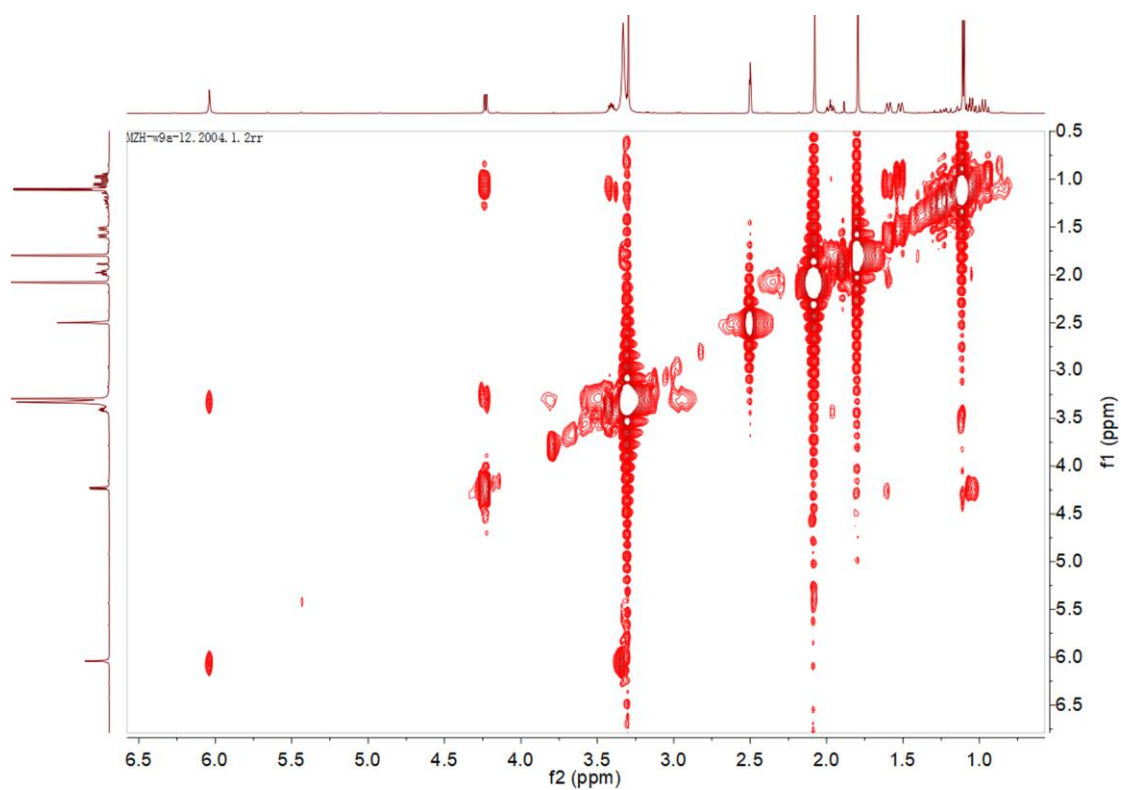

Figure S35. NOESY spectrum of 5

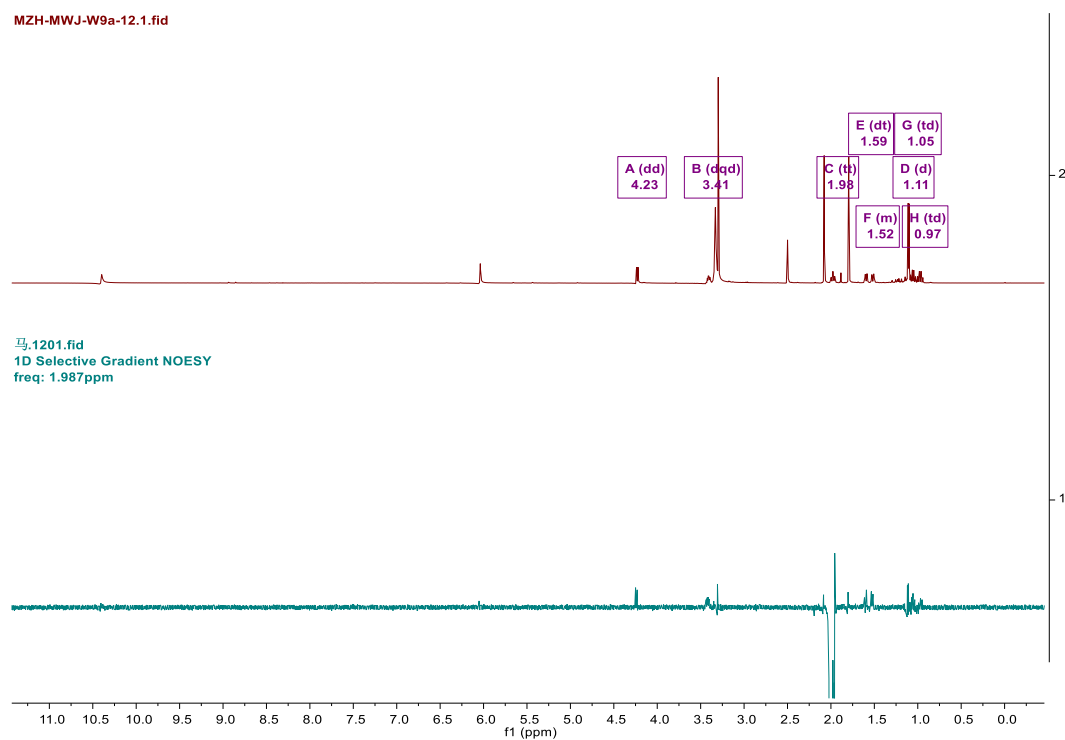

Figure S36. 1D selective NOESY spectrum of 5 (1.98ppm)

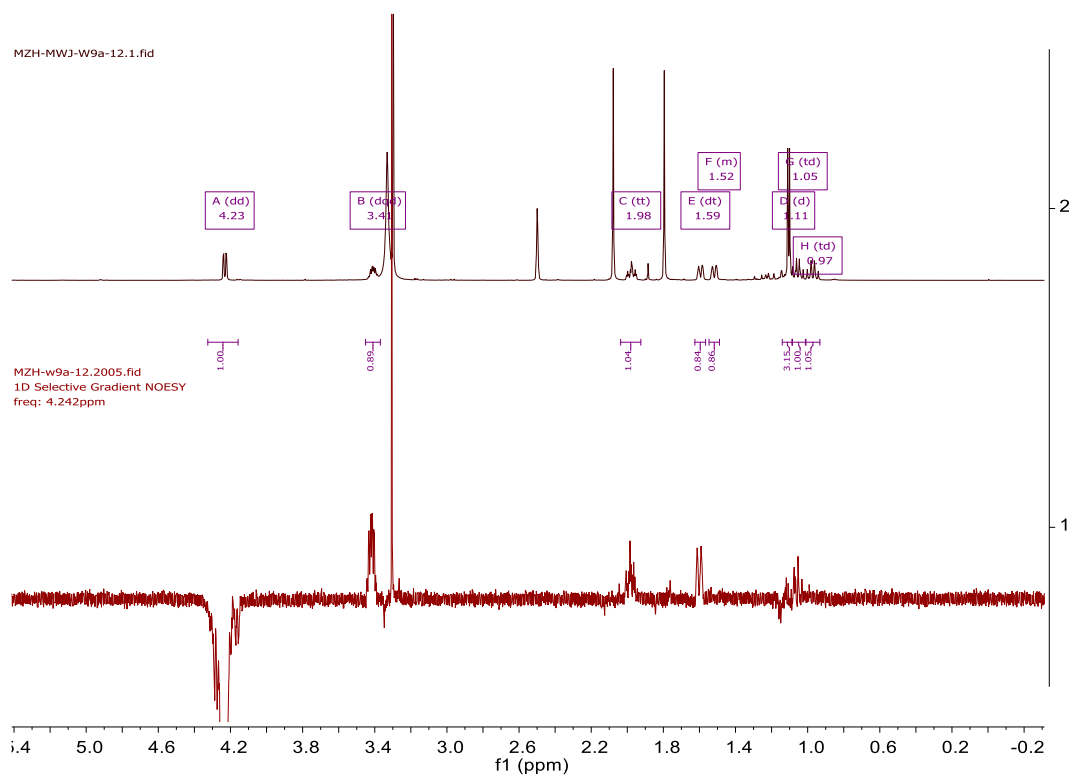

Figure S37. 1D selective NOESY spectrum of **5** (4.24ppm)

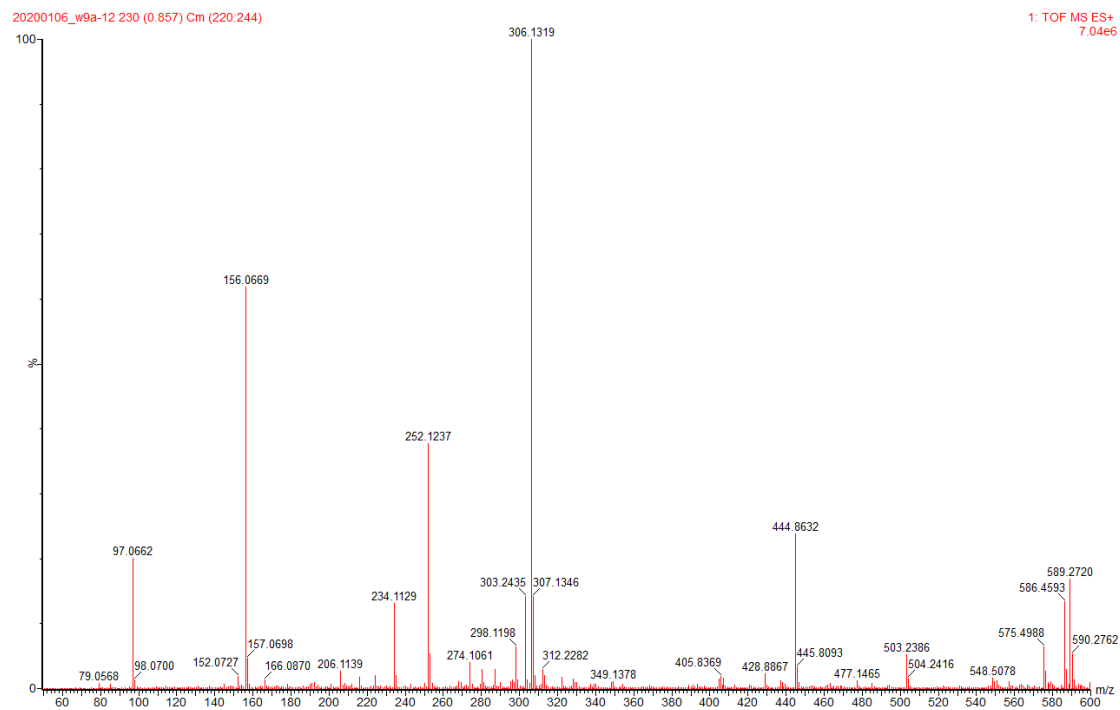

Figure S38. HR-ESI-MS spectrum of **5**



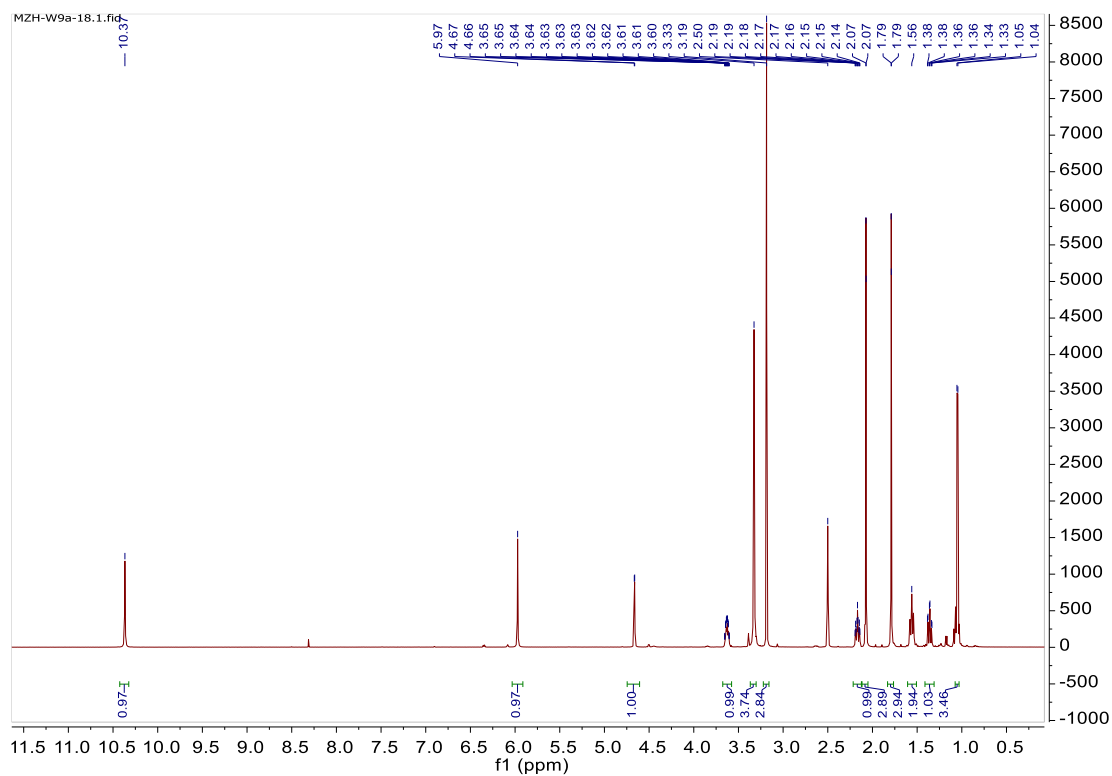

Figure S39. <sup>1</sup>H NMR spectrum of **6**

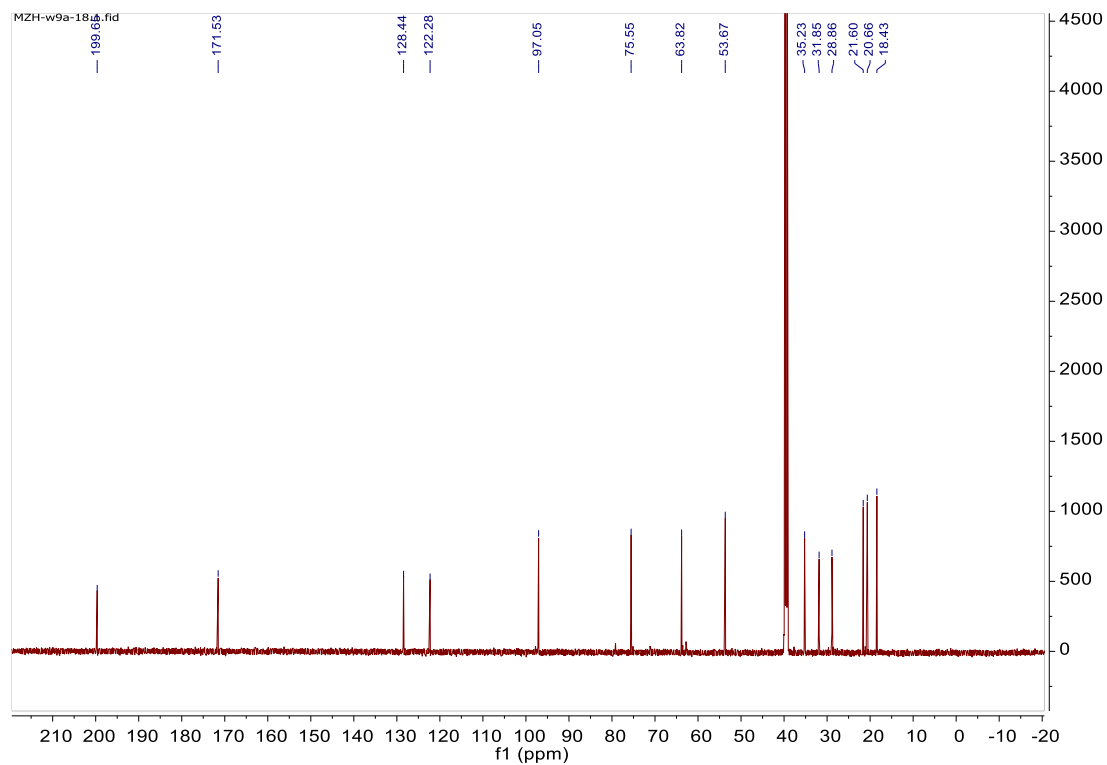

Figure S40. <sup>13</sup>C NMR spectrum of **6**

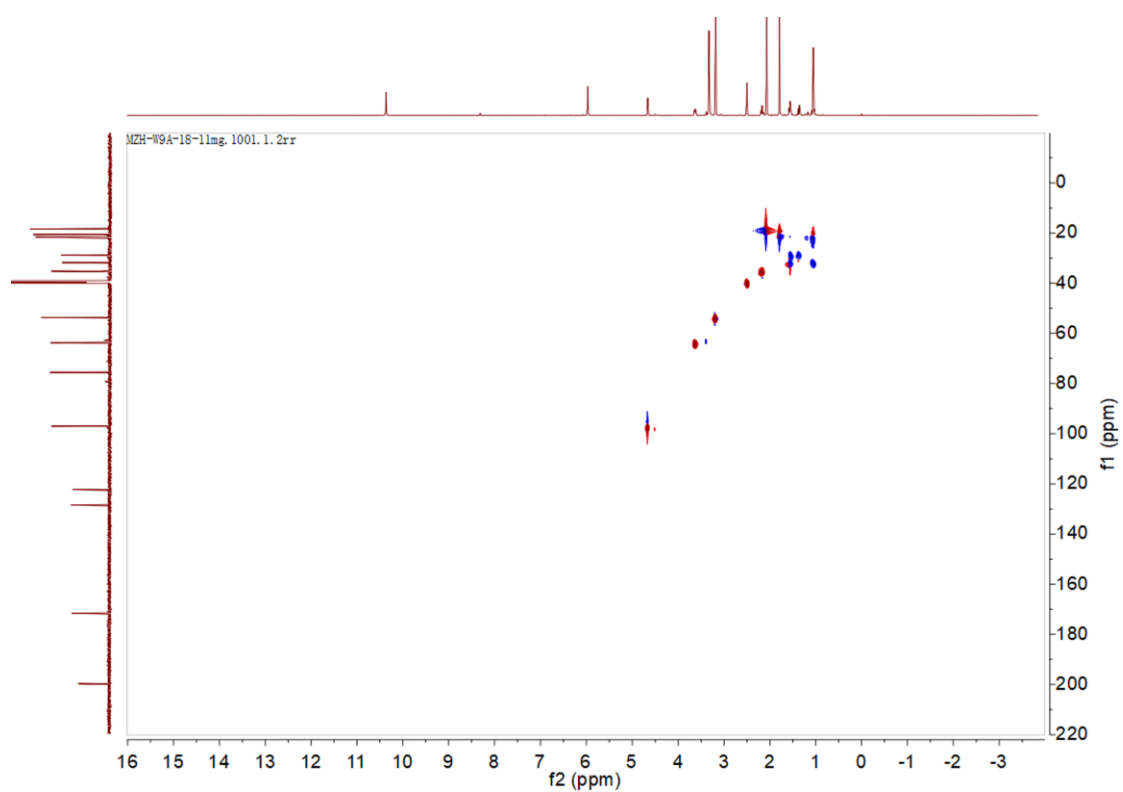

Figure S41. HSQC spectrum of 6

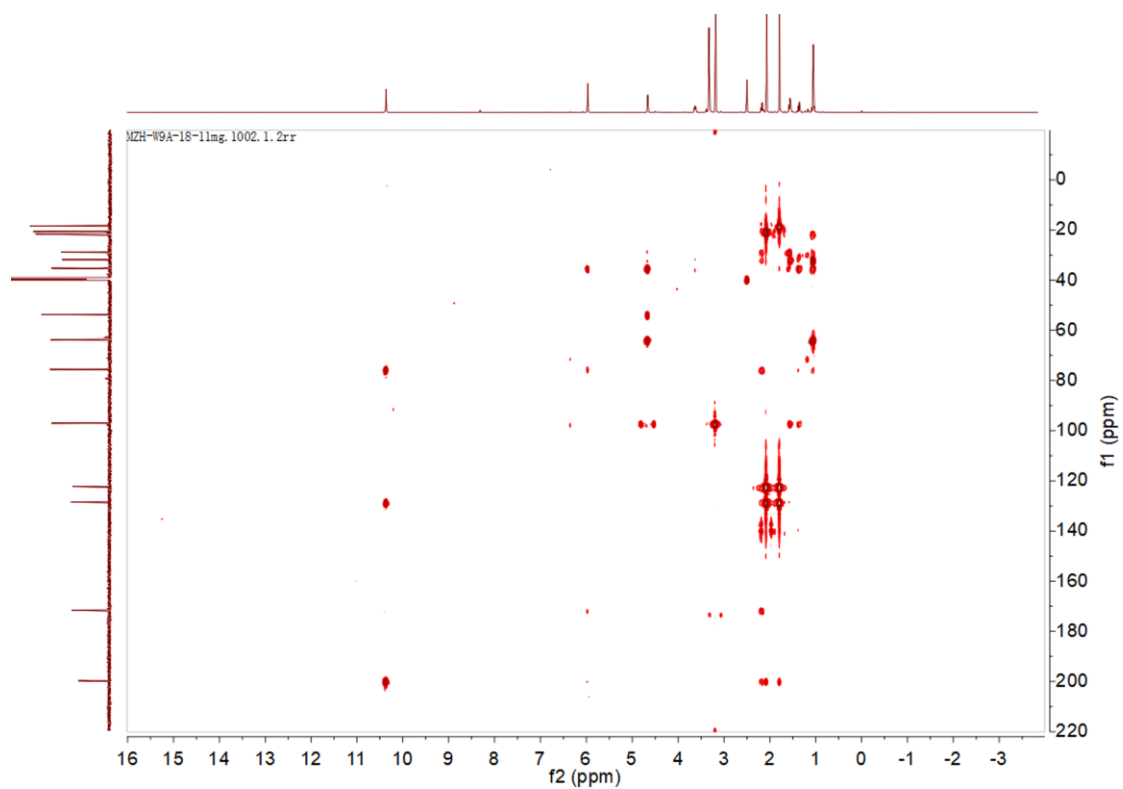

Figure S42.  $^1\text{H}$ - $^1\text{H}$  COSY spectrum of 6

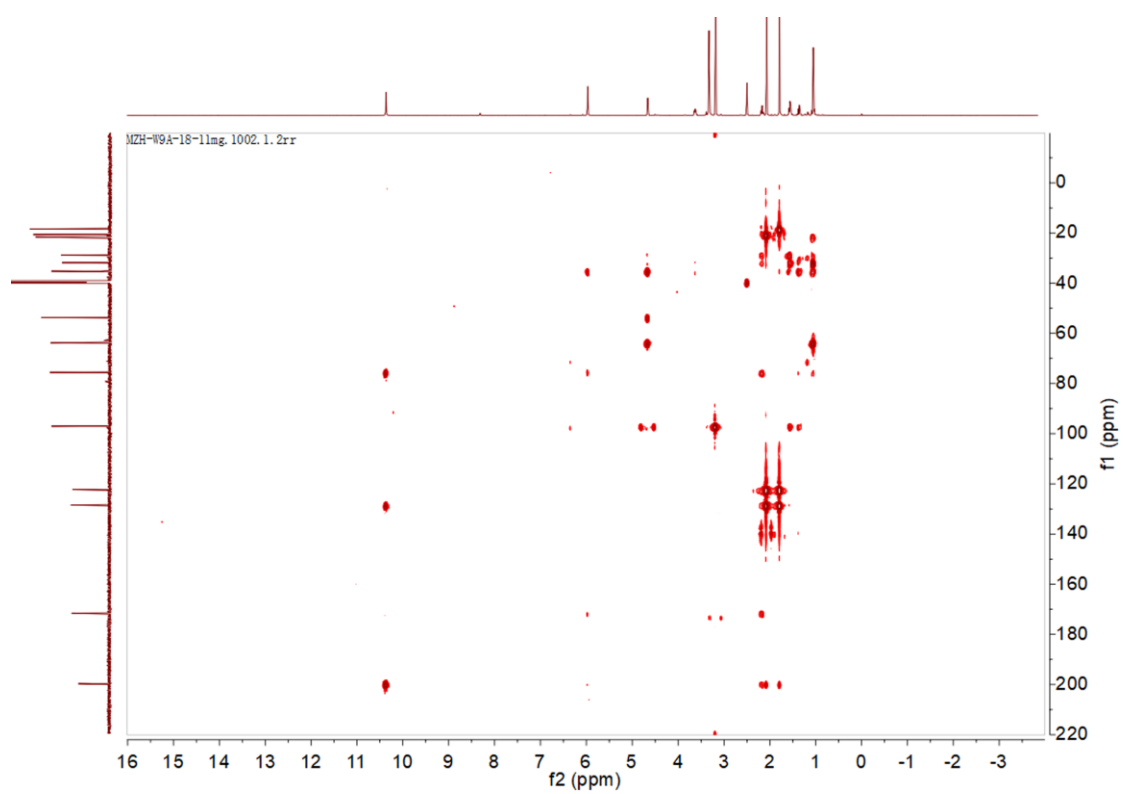

Figure S43. HMBC spectrum of **6**

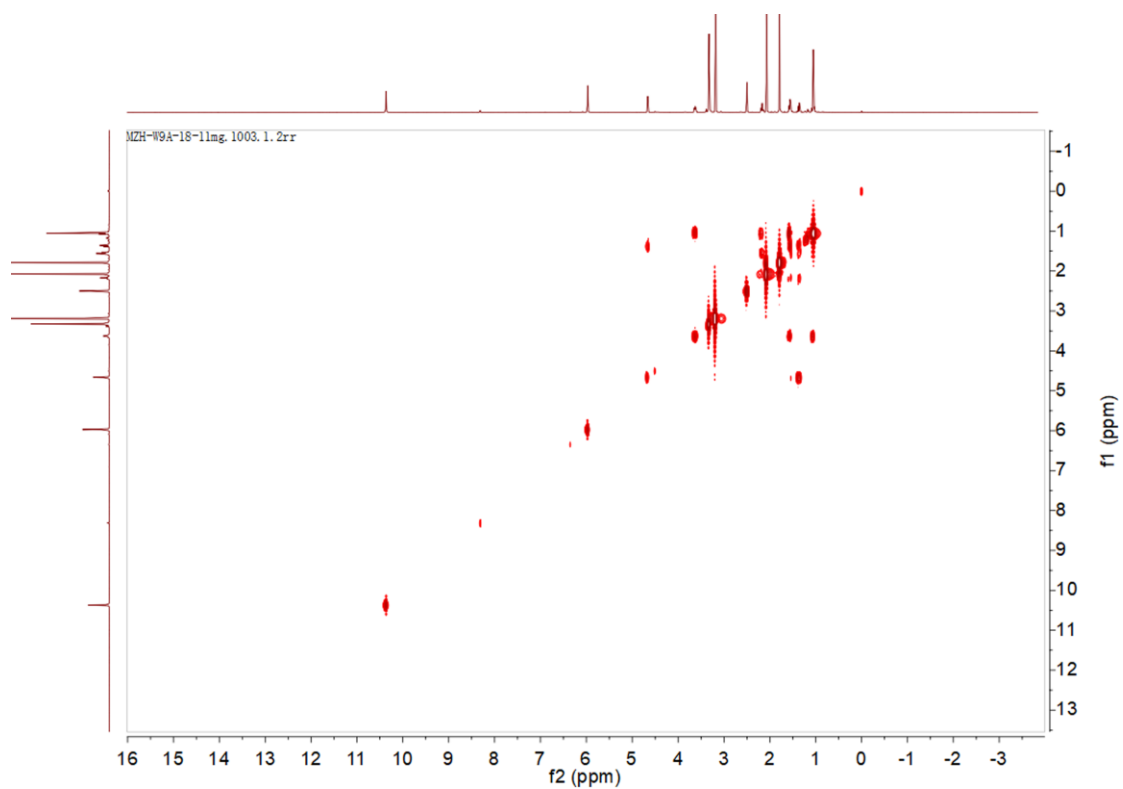

Figure S44. NOESY spectrum of **6**

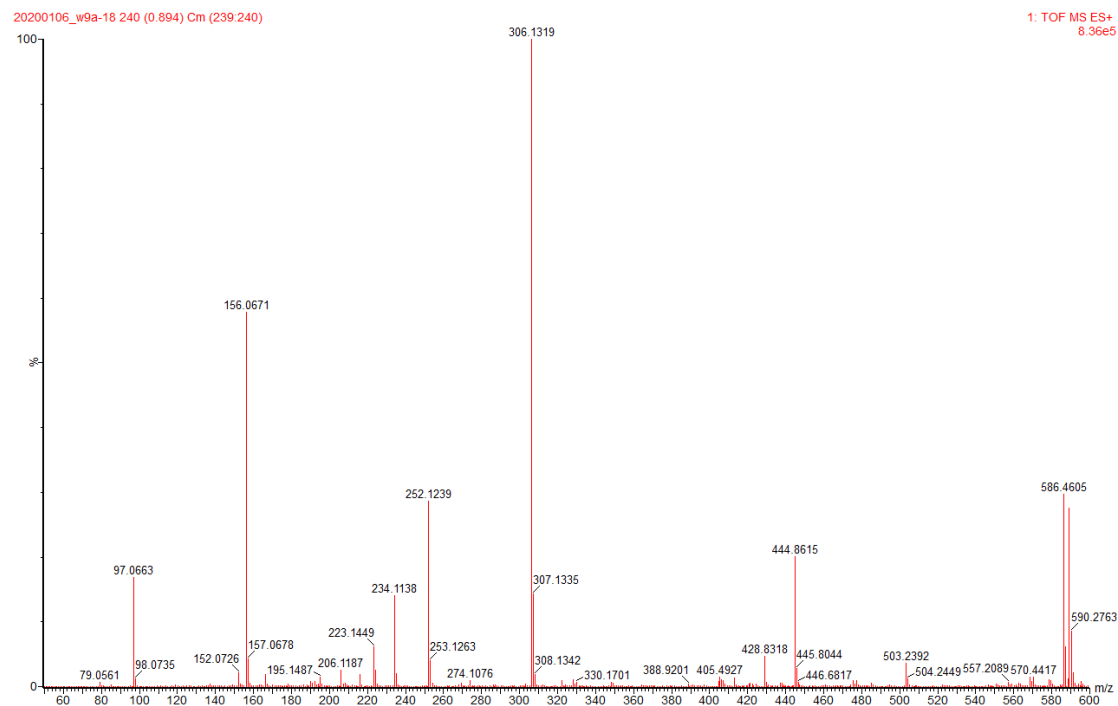

Figure S45. HR-ESI-MS spectrum of **6**

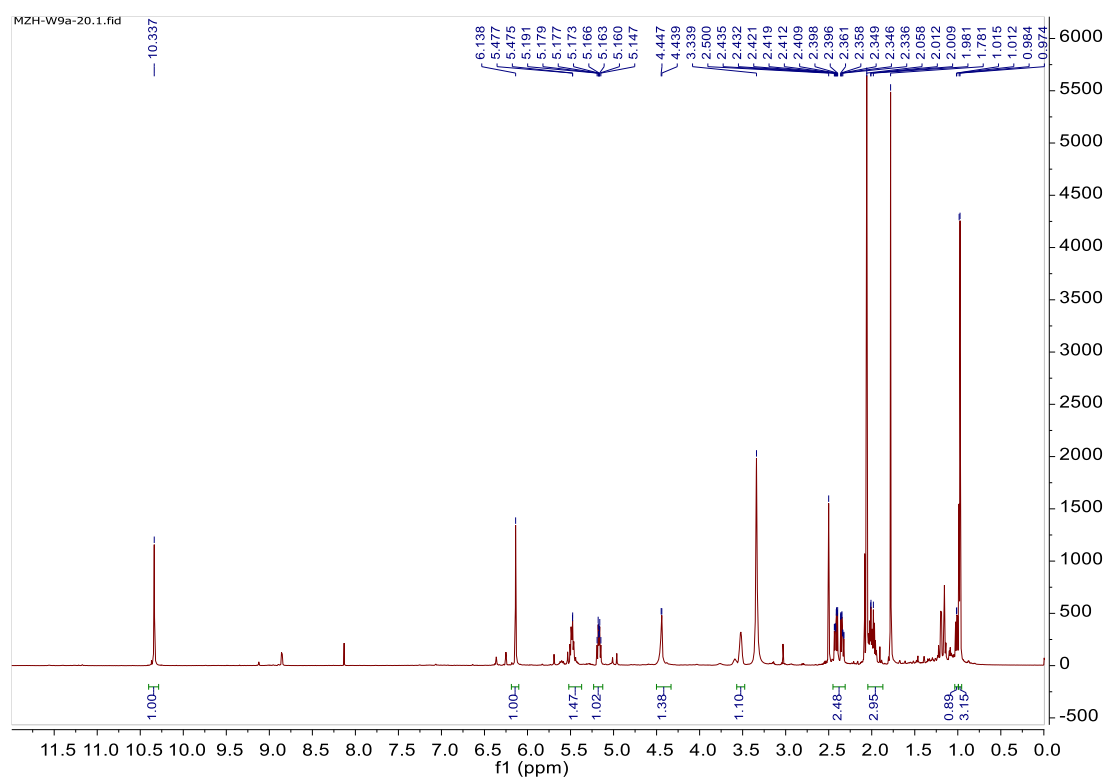

Figure S46. <sup>1</sup>H NMR spectrum of **7**

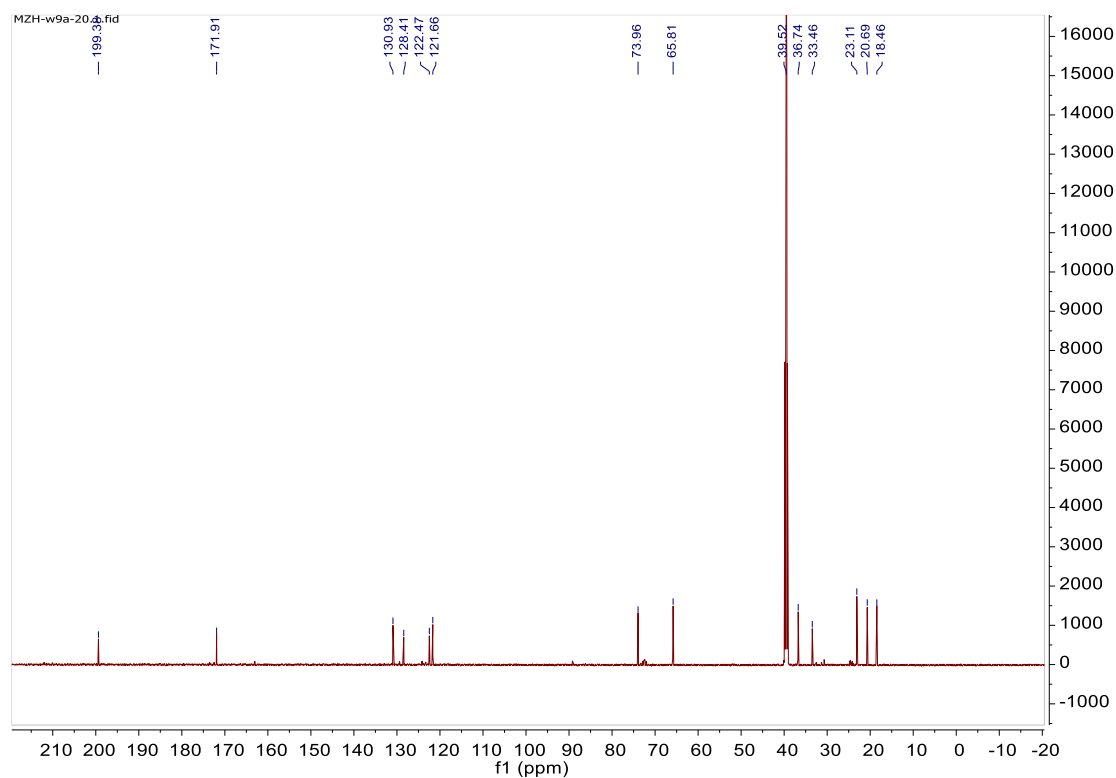

Figure S47.  $^{13}\text{C}$  NMR spectrum of 7

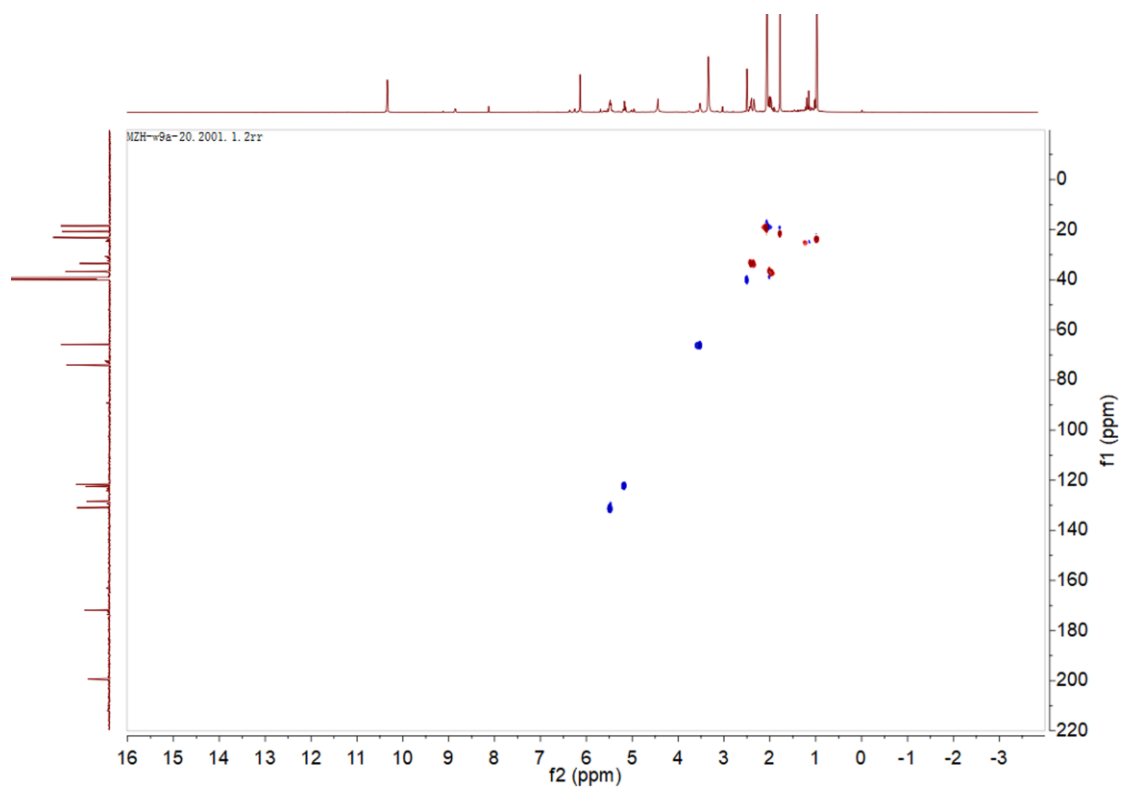

Figure S48. HSQC spectrum of 7

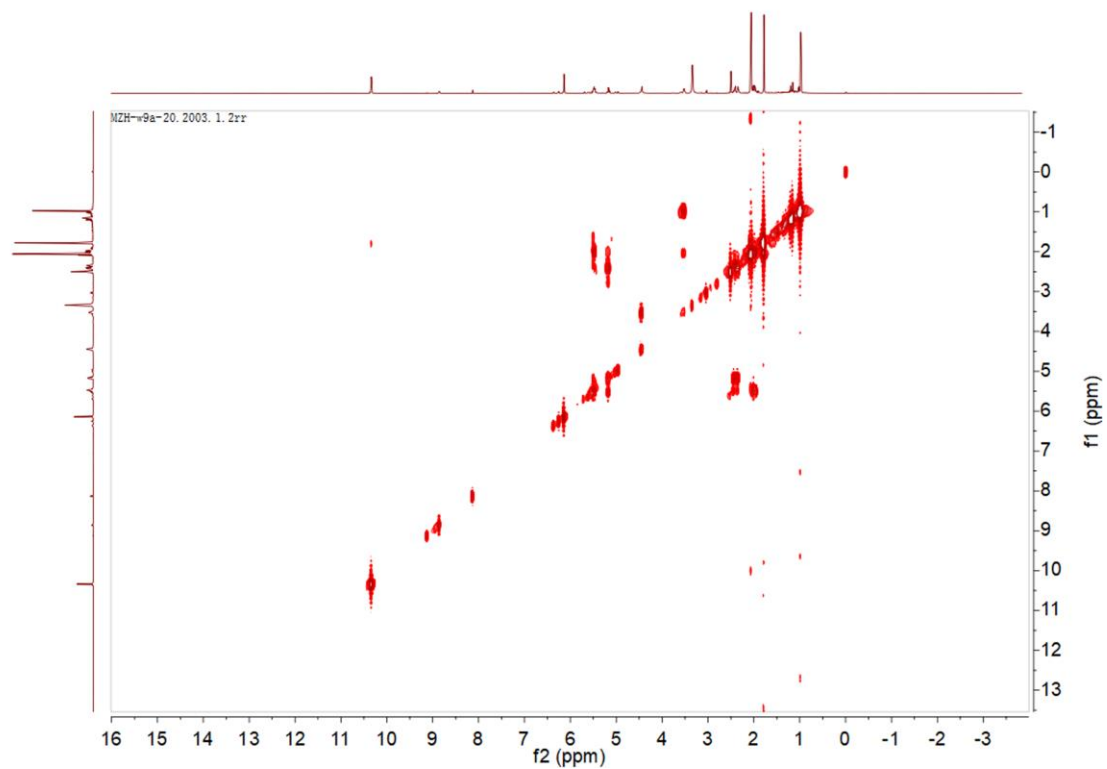

Figure S49.  $^1\text{H}$ - $^1\text{H}$  COSY spectrum of **7**

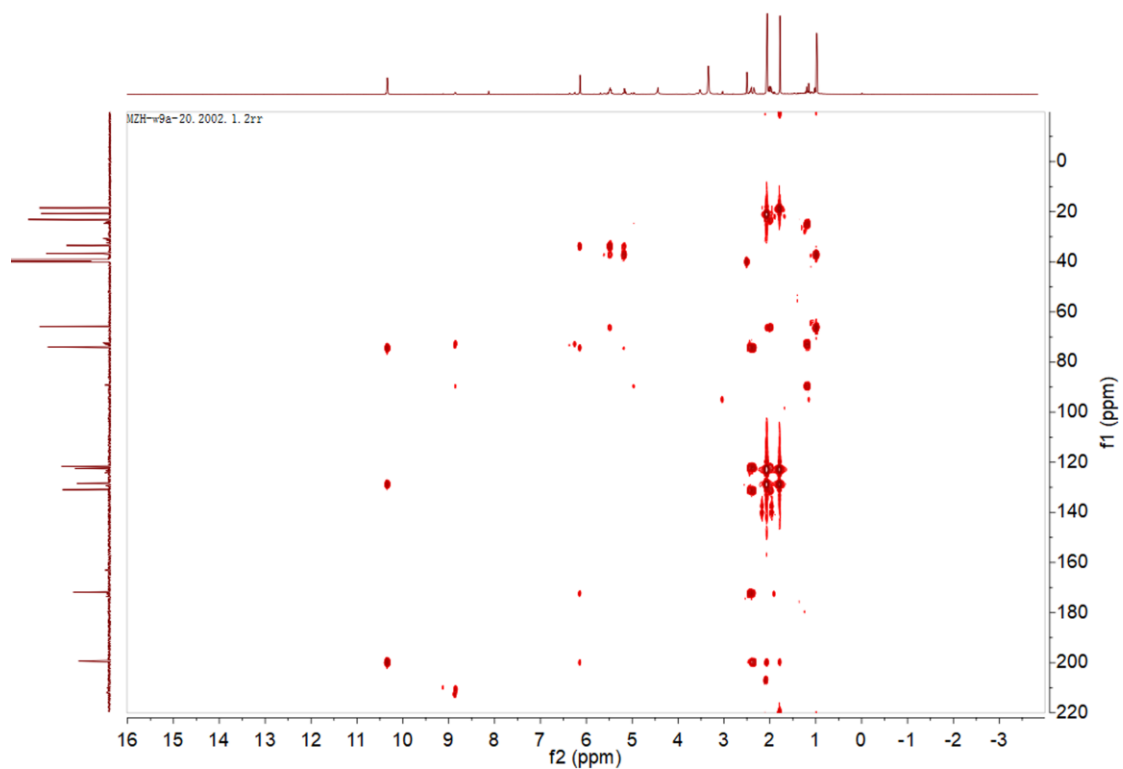

Figure S50. HMBC spectrum of **7**

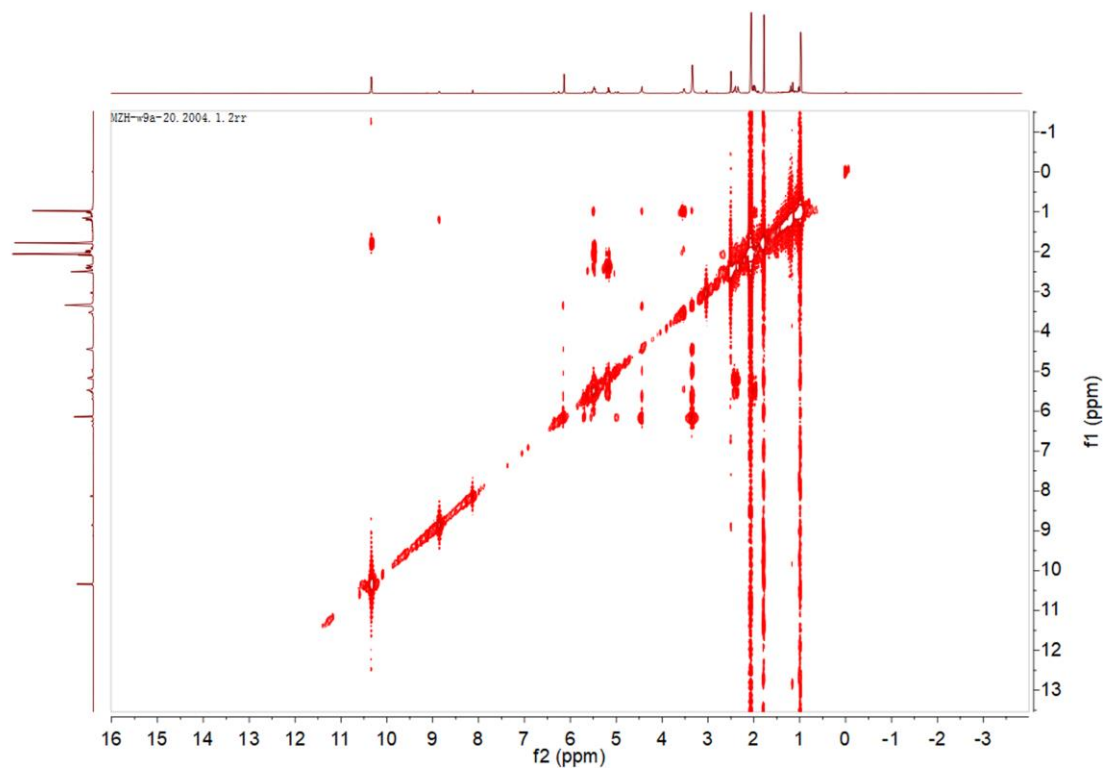

Figure S51. NOESY spectrum of 7

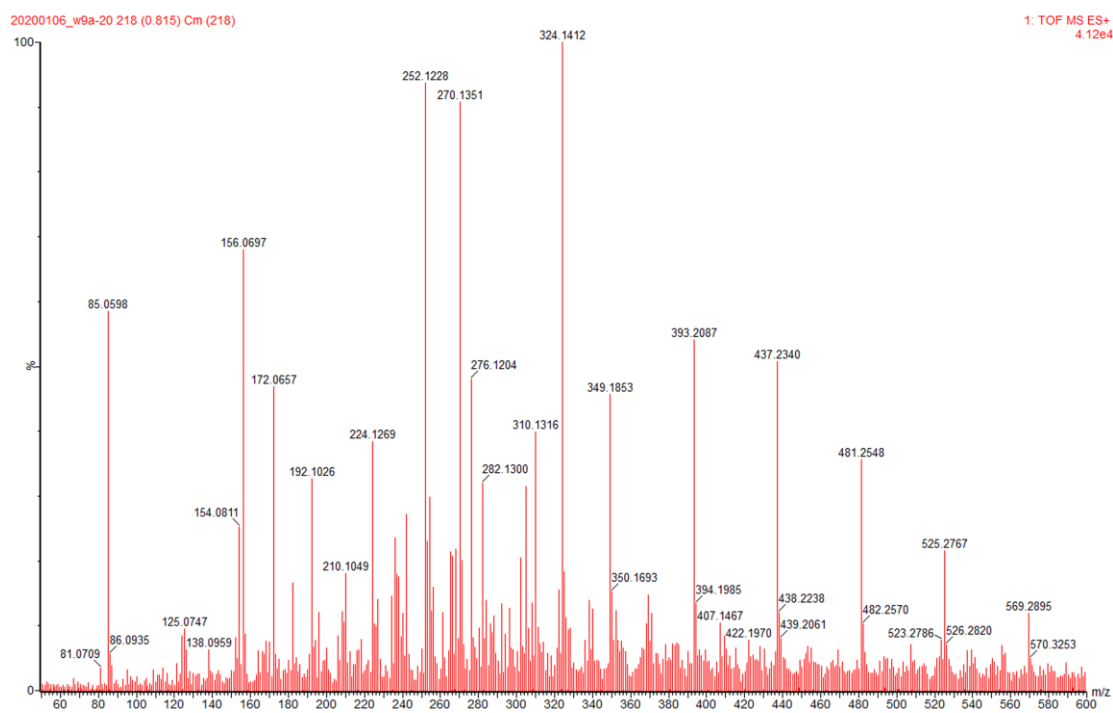

Figure S52. HR-ESI-MS spectrum of 7

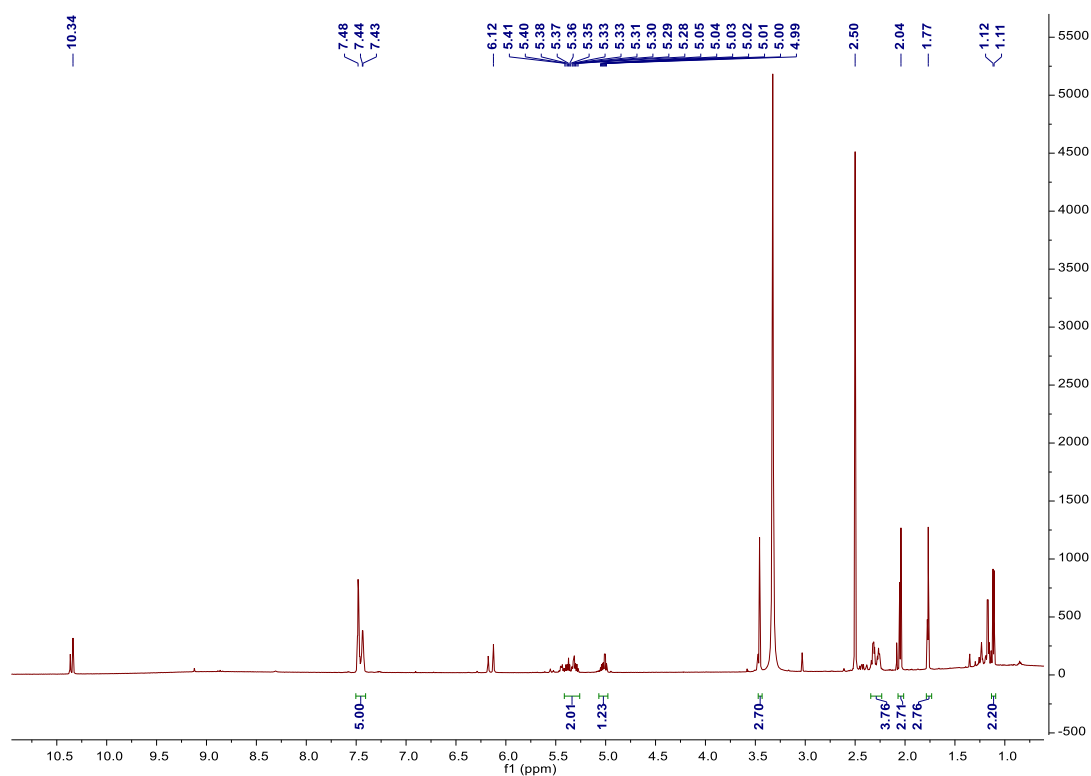

Figure S53.  $^1\text{H}$  NMR spectrum of (R)-MTPA ester of 7

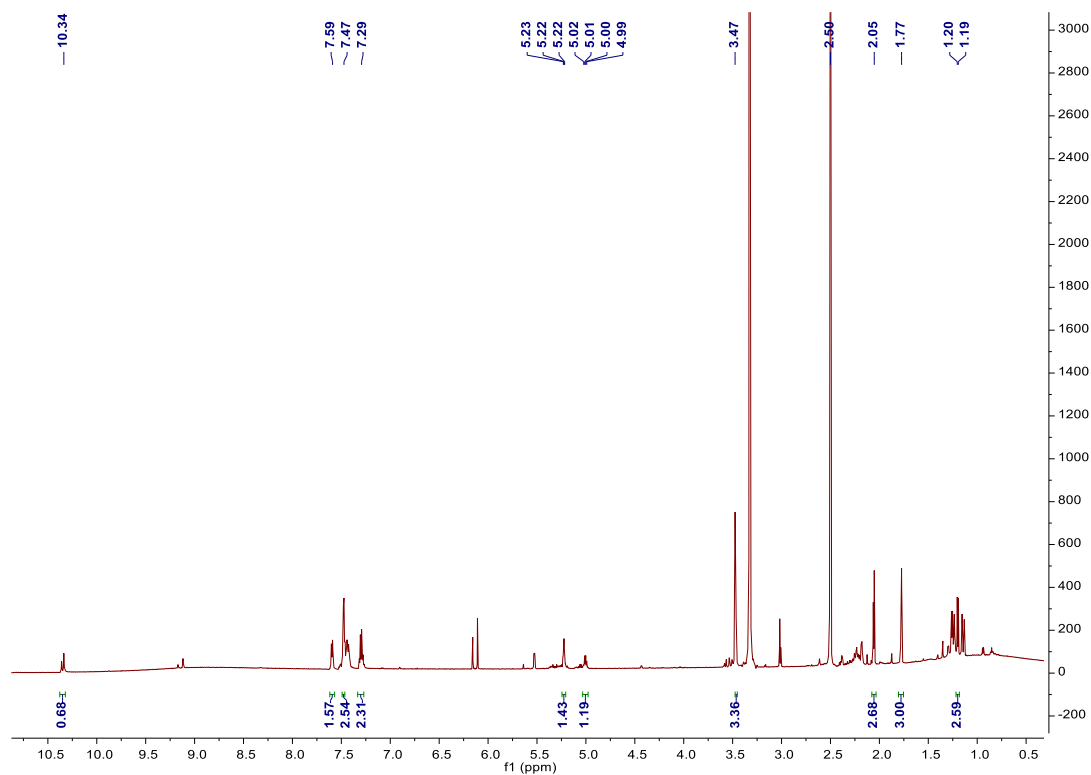

Figure S54.  $^1\text{H}$  NMR spectrum of (S)-MTPA ester of 7

Table S2. Relative free energies<sup>a</sup> and equilibrium populations<sup>b</sup> of conformers for (3S, 6S, 10R)-2a<sup>c</sup>



| Conformer  | $\Delta G$ | P (%) |
|------------|------------|-------|
| <b>2a1</b> | 0.00       | 42.97 |
| <b>2a2</b> | 0.52       | 17.90 |
| <b>2a3</b> | 0.78       | 11.50 |
| <b>2a4</b> | 0.98       | 8.26  |
| <b>2a5</b> | 1.11       | 6.62  |
| <b>2a6</b> | 1.11       | 6.56  |

<sup>a</sup> B3LYP/6-31G(d), in kcal/mol. <sup>b</sup> From  $\Delta G$  values at 298.15 K. <sup>c</sup> in MeOH, no imaginary frequency.

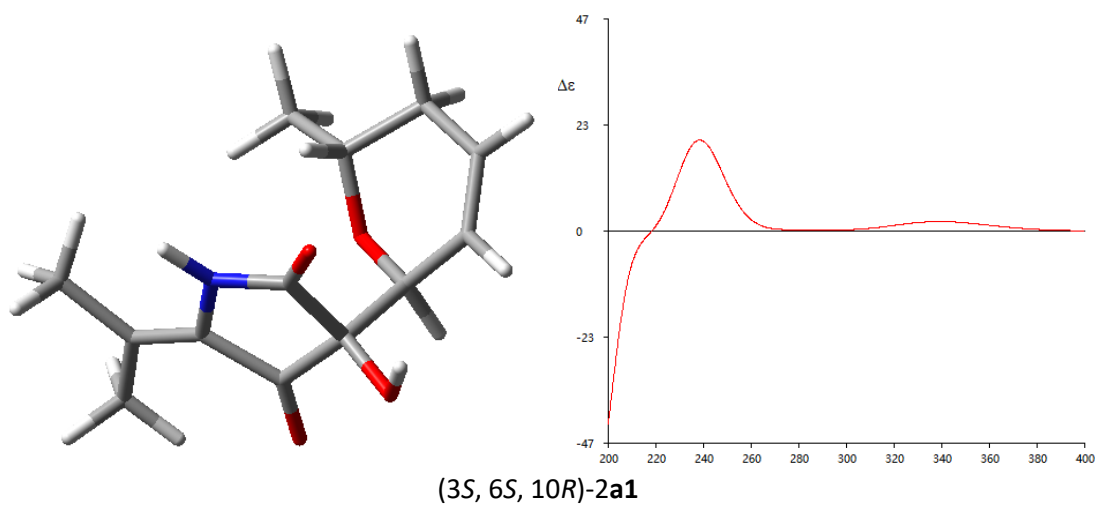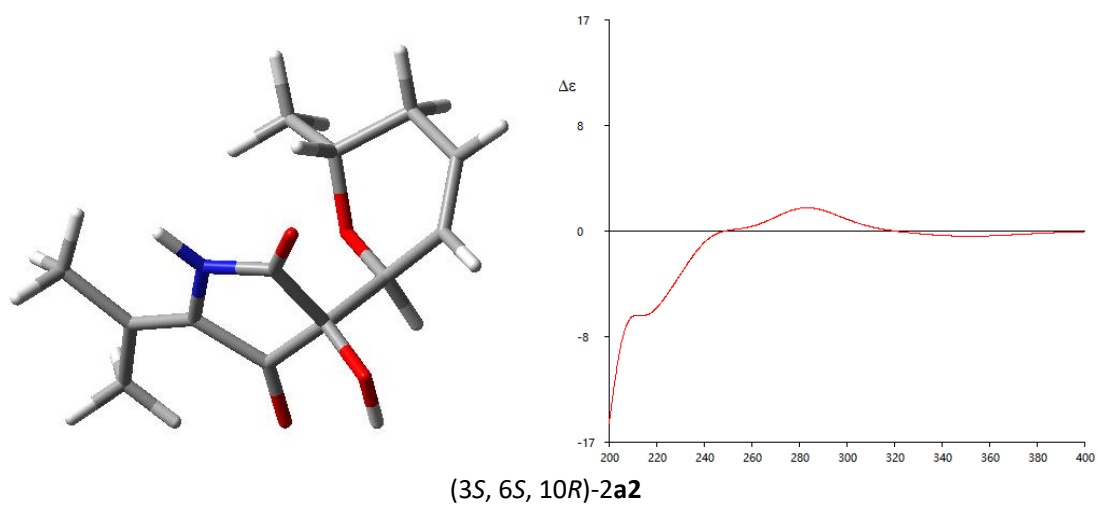

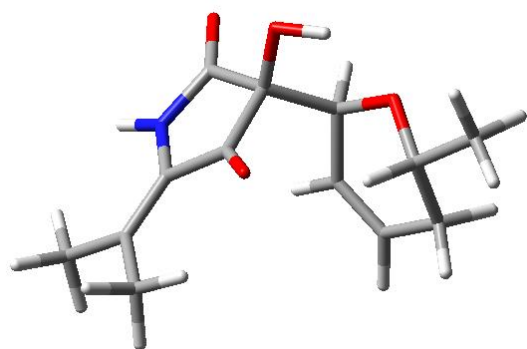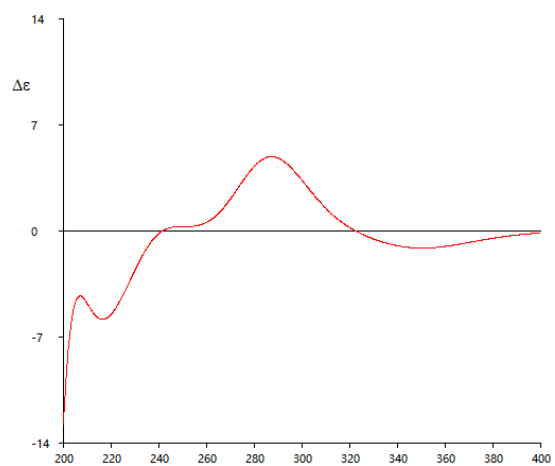

**(3*S*, 6*S*, 10*R*)-2a3**

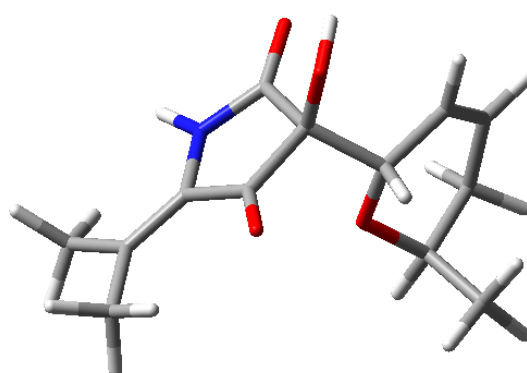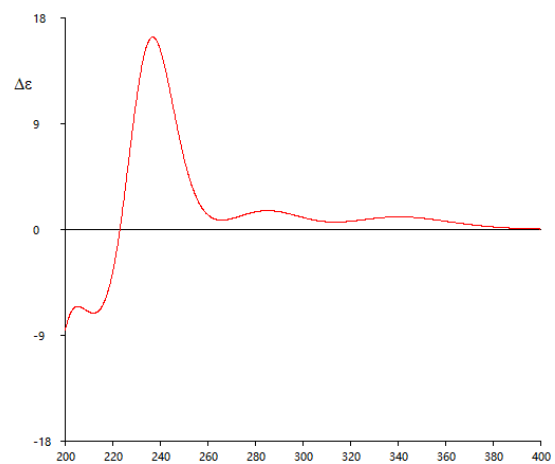

**(3*S*, 6*S*, 10*R*)-2a4**

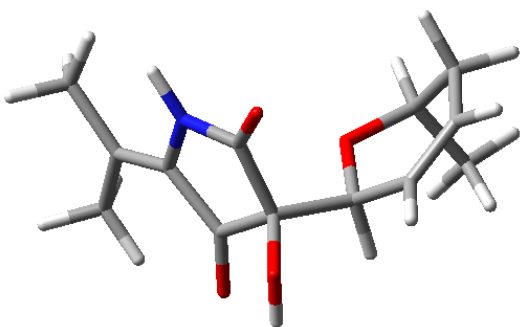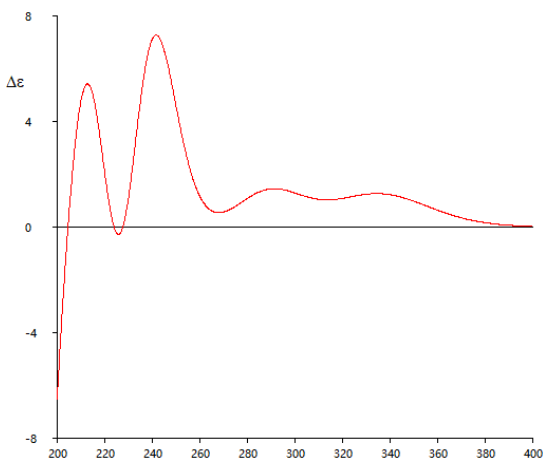

**(3*S*, 6*S*, 10*R*)-2a5**

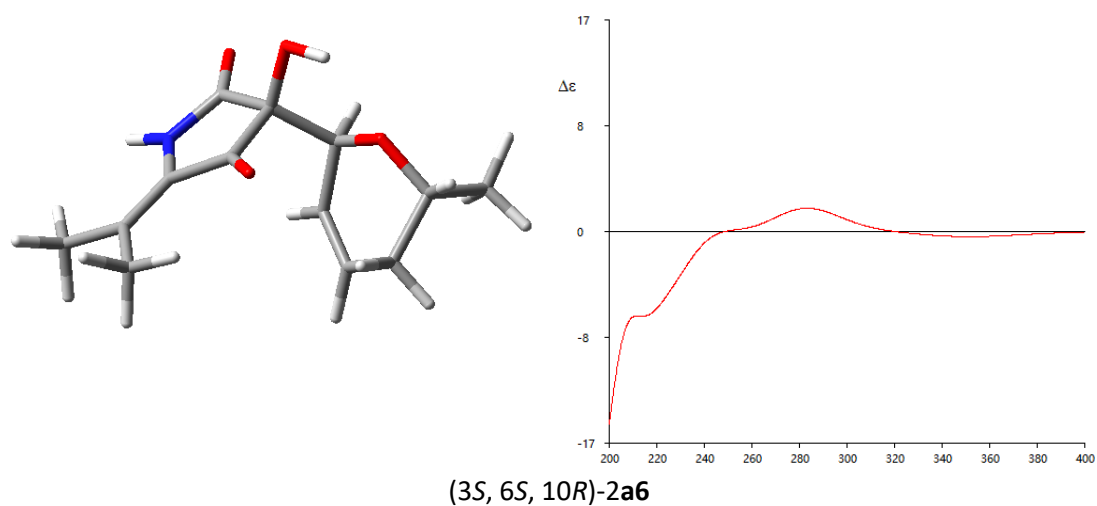

**Figure S55.** The optimized structures (left) and the calculated CD spectra of conformers (3S, 6S, 10R)-2a in MeOH at M06-2X/def2TZVP level (right).  $\sigma=0.30$  eV.

**Table S3.** Relative free energies<sup>a</sup> and equilibrium populations<sup>b</sup> of conformers for (3S, 6R, 10S)-2b<sup>c</sup>

| Conformer  | $\Delta G$ | P (%) |
|------------|------------|-------|
| <b>2b1</b> | 0.00       | 51.42 |
| <b>2b2</b> | 0.61       | 18.24 |
| <b>2b3</b> | 0.65       | 17.19 |
| <b>2b4</b> | 0.81       | 13.15 |

<sup>a</sup> B3LYP/6-31G(d), in kcal/mol. <sup>b</sup> From  $\Delta G$  values at 298.15 K. <sup>c</sup> in MeOH, no imaginary frequency.

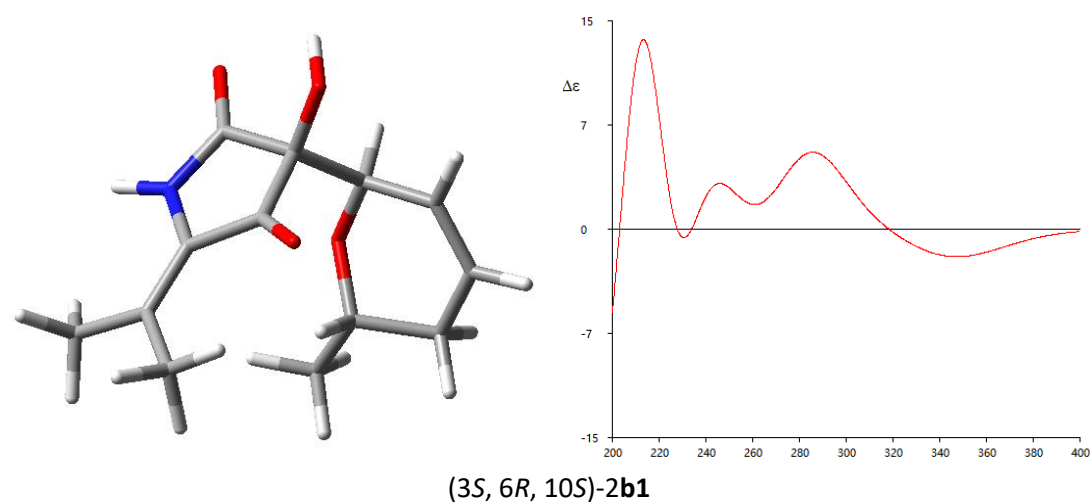

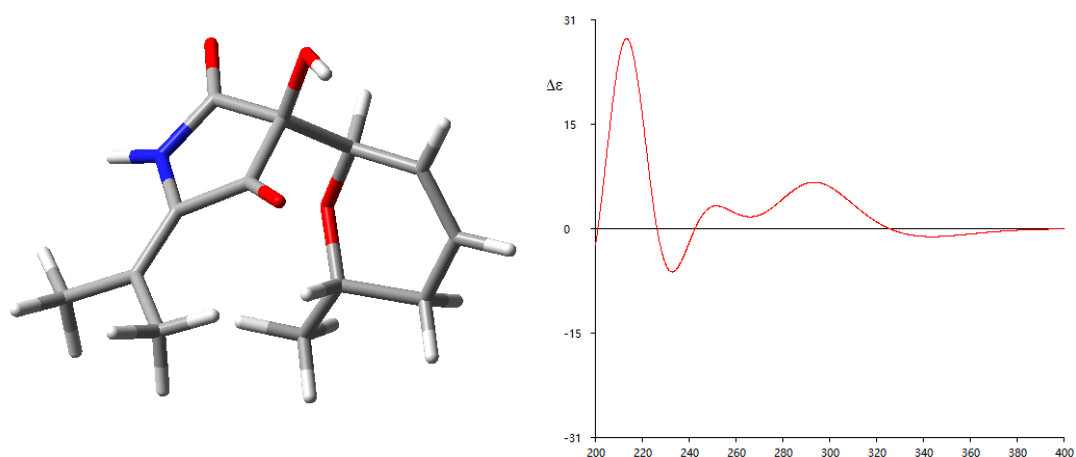

(3S, 6R, 10S)-2b2

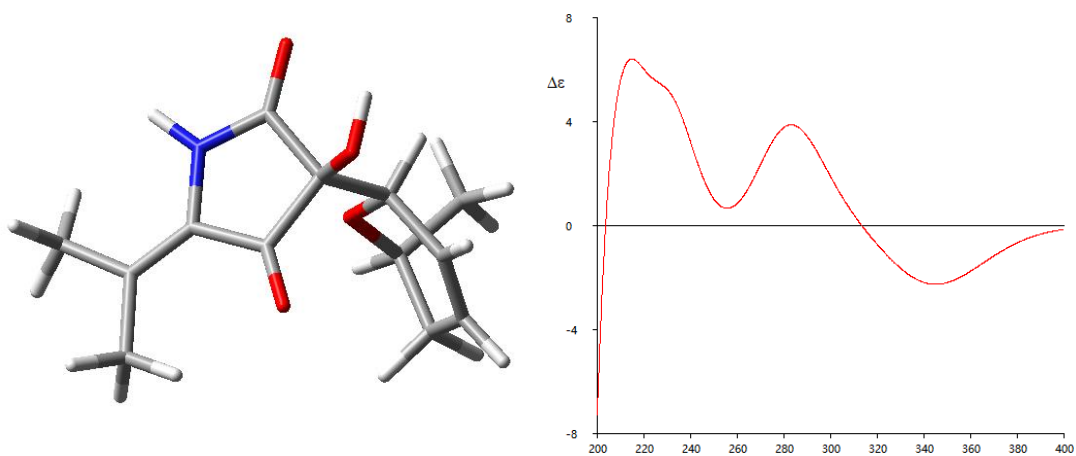

(3S, 6R, 10S)-2b3

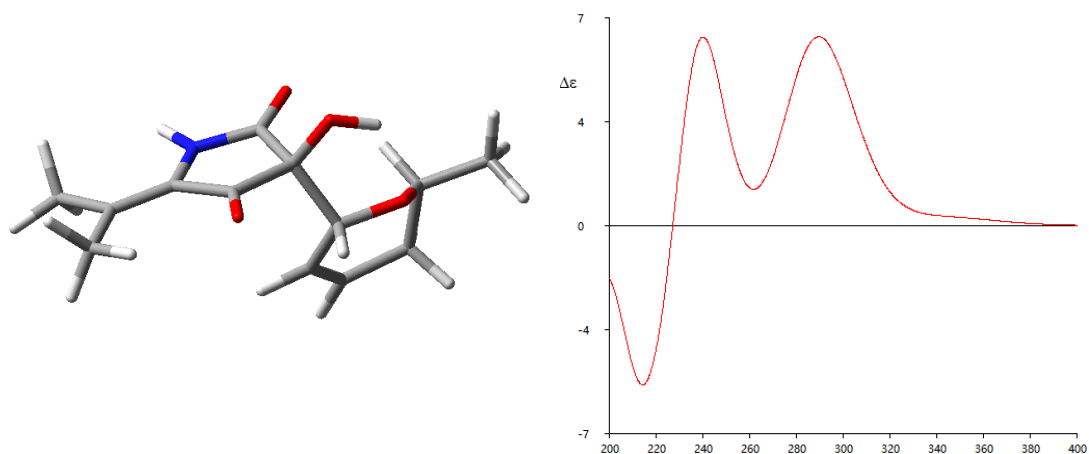

(3S, 6R, 10S)-2b4

**Figure S56.** The optimized structures (left) and the calculated CD spectra of conformers (3S, 6R, 10S)-2b in MeOH at M06-2X/def2TZVP level (right).  $\sigma=0.30$  eV.

**Table S4.** Relative free energies<sup>a</sup> and equilibrium populations<sup>b</sup> of conformers for (3S, 6S, 9R)-3a<sup>c</sup>

| Conformer  | $\Delta G$ | P (%) |
|------------|------------|-------|
| <b>3a1</b> | 0.00       | 45.78 |
| <b>3a2</b> | 0.47       | 20.56 |
| <b>3a3</b> | 0.48       | 20.22 |
| <b>3a4</b> | 0.73       | 13.45 |

<sup>a</sup> B3LYP/6-31G(d), in kcal/mol. <sup>b</sup> From  $\Delta G$  values at 298.15 K. <sup>c</sup> in MeOH, no imaginary frequency.

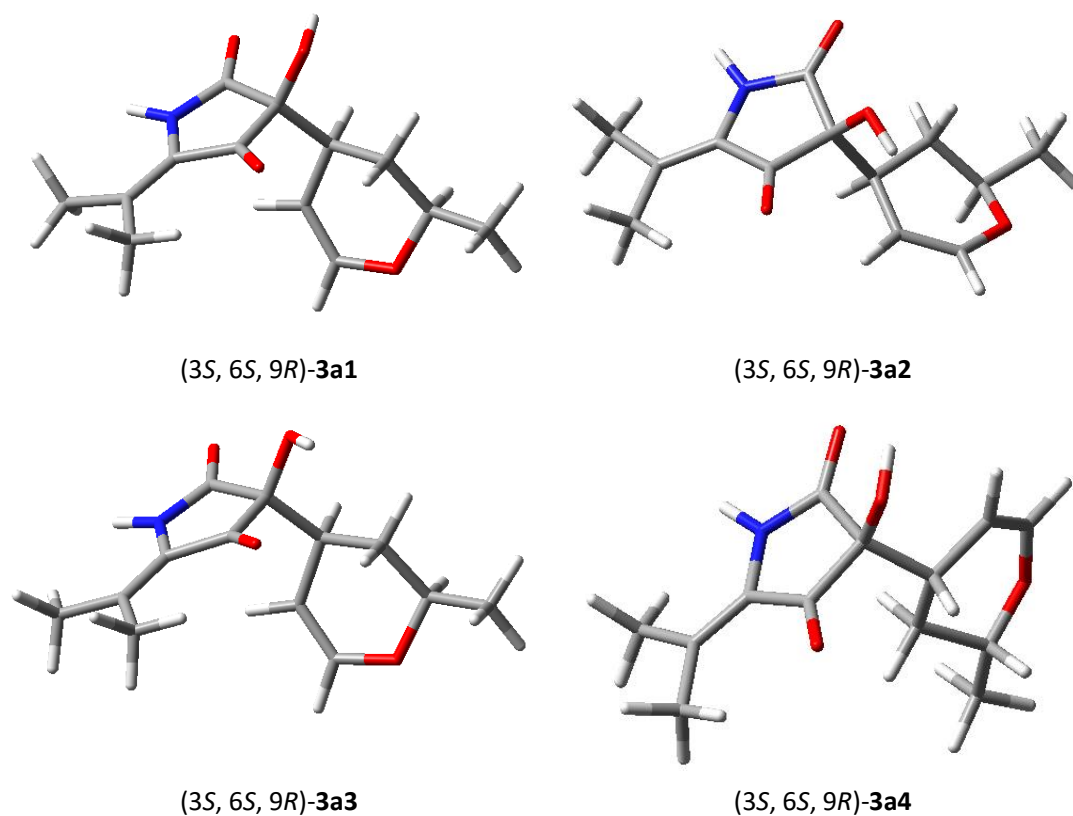

**Figure S57.** The optimized structure of conformers for (3*S*, 6*S*, 9*R*)-**3a** in MeOH at B3LYP/6-31G (d) level

**Table S5.** Relative free energies<sup>a</sup> and equilibrium populations<sup>b</sup> of conformers for (3*S*, 6*R*, 9*S*)-**3b**<sup>c</sup>

| Conformer  | $\Delta G$ | P (%) |
|------------|------------|-------|
| <b>3b1</b> | 0.00       | 46.24 |
| <b>3b2</b> | 0.36       | 25.13 |
| <b>3b3</b> | 0.52       | 19.29 |
| <b>3b4</b> | 0.95       | 9.34  |

<sup>a</sup> B3LYP/6-31G(d), in kcal/mol. <sup>b</sup> From  $\Delta G$  values at 298.15 K. <sup>c</sup> in MeOH, no imaginary frequency.

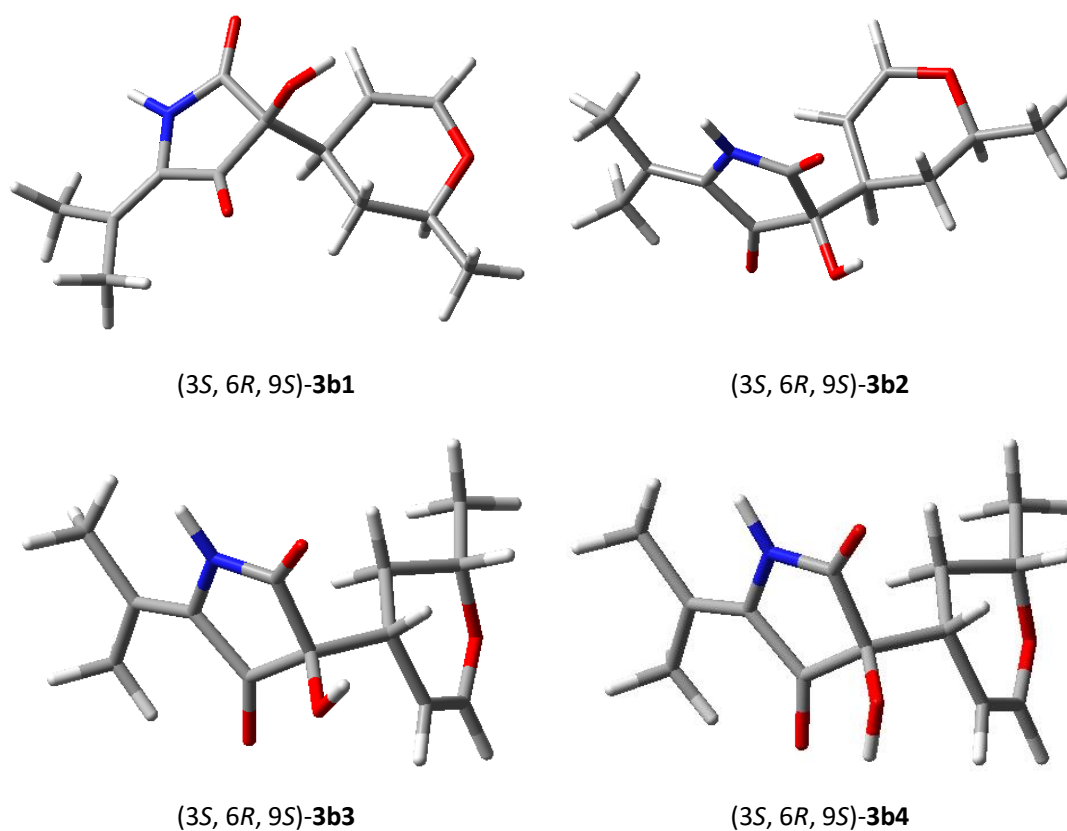

**Figure S58.** The optimized structure of conformers for (3*S*, 6*R*, 9*S*)-**3b** in MeOH at B3LYP/6-31G (d) level

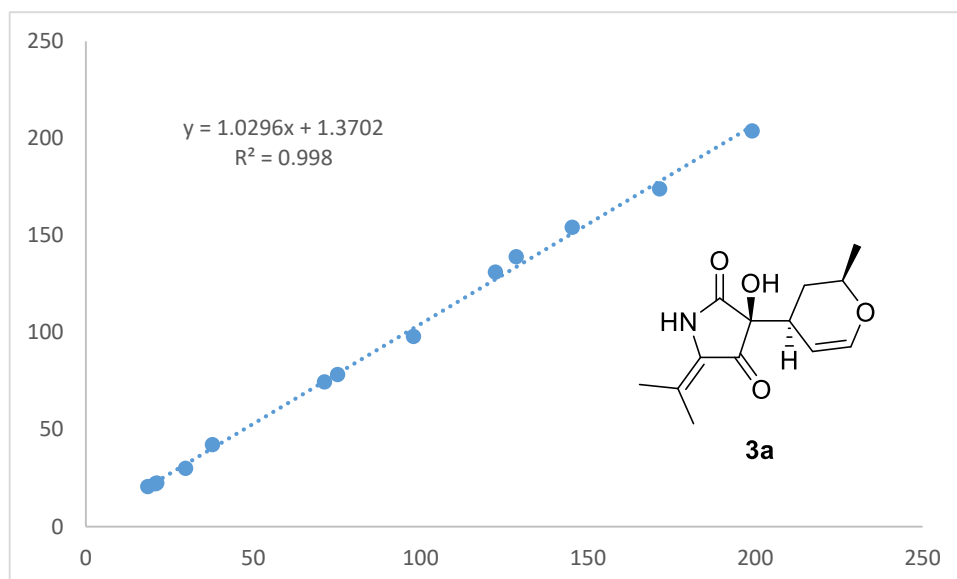

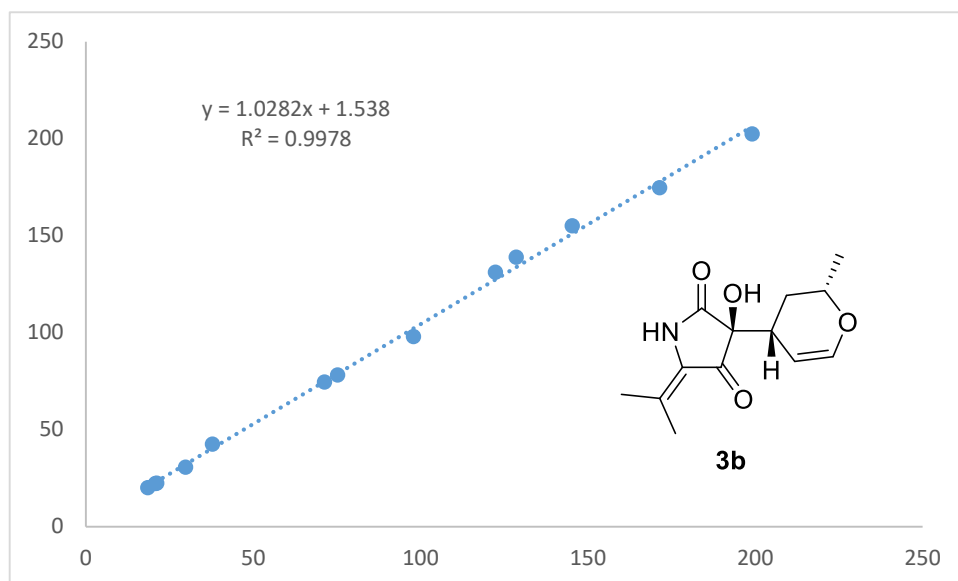

**Figure S59.** Correlation plots of experimental  $^{13}\text{C}$  NMR chemical shifts versus the corresponding calculated data for (3S, 6S, 9R)-3a and (3S, 6R, 9S)-3b

| Nuclei | sp2? | DP4+        | 89.66%   | 10.34%   |
|--------|------|-------------|----------|----------|
|        |      | xperimental | Isomer 1 | Isomer 2 |
| C      | x    | 122.3       | 131.118  | 131.161  |
| C      | x    | 199.04      | 203.806  | 202.455  |
| C      |      | 75.14       | 78.319   | 78.102   |
| C      | x    | 171.35      | 174.002  | 174.743  |
| C      | x    | 128.57      | 139.058  | 138.82   |
| C      |      | 18.49       | 20.49    | 20.138   |
| C      |      | 20.71       | 22.077   | 22.151   |
| C      |      | 37.73       | 42.155   | 42.442   |
| C      | x    | 97.81       | 97.961   | 98.007   |
| C      | x    | 145.33      | 154.144  | 155.104  |
| C      |      | 71.2        | 74.538   | 74.579   |
| C      |      | 29.7        | 30.025   | 30.613   |
| C      |      | 21.17       | 22.413   | 22.364   |

**Figure S60.** DP4+ probabilities (%) for conformers (3S, 6S, 9R)-3a (isomer 1) and (3S, 6R, 9S)-3b (isomer 2)

**Table S6.** Relative free energies<sup>a</sup> and equilibrium populations<sup>b</sup> of conformers for (3S,6S,9S)-4a<sup>c</sup>

| Conformer  | $\Delta G$ | P (%) |
|------------|------------|-------|
| <b>4a1</b> | 0.00       | 56.61 |
| <b>4a2</b> | 0.35       | 31.47 |
| <b>4a3</b> | 1.30       | 6.28  |
| <b>4a4</b> | 1.37       | 5.64  |

<sup>a</sup> B3LYP/6-31G(d), in kcal/mol. <sup>b</sup> From  $\Delta G$  values at 298.15 K. <sup>c</sup> in MeOH, no imaginary frequency.

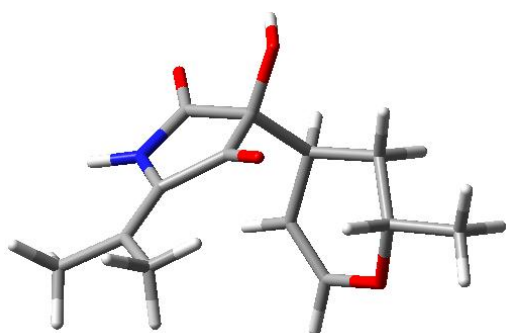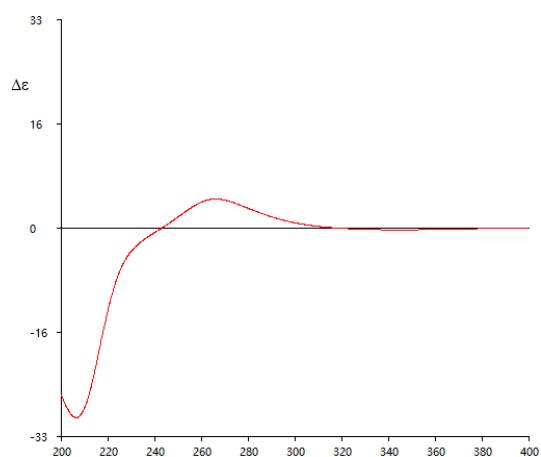

**(3S,6S,9S)-4a1**

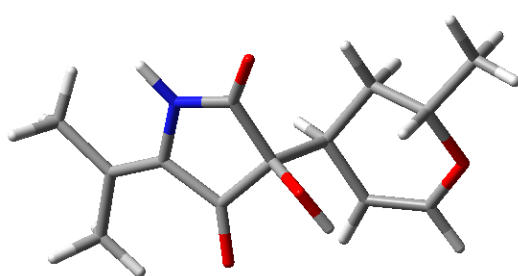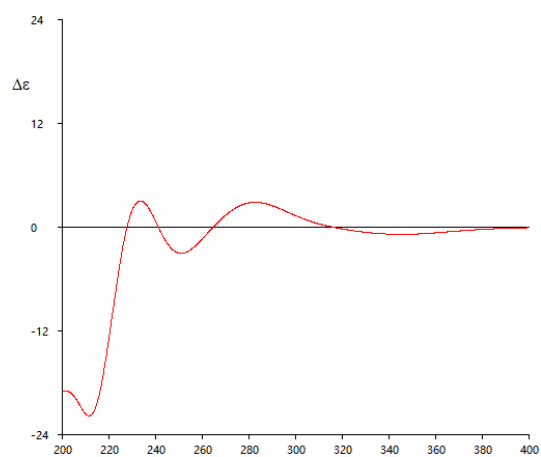

**(3S,6S,9S)-4a2**

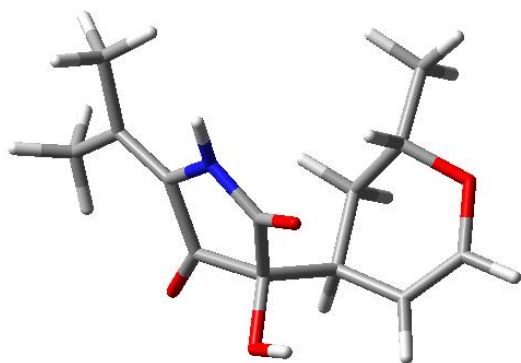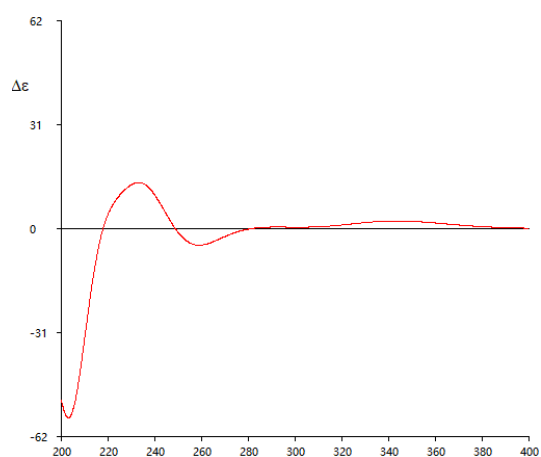

**(3S,6S,9S)-4a3**



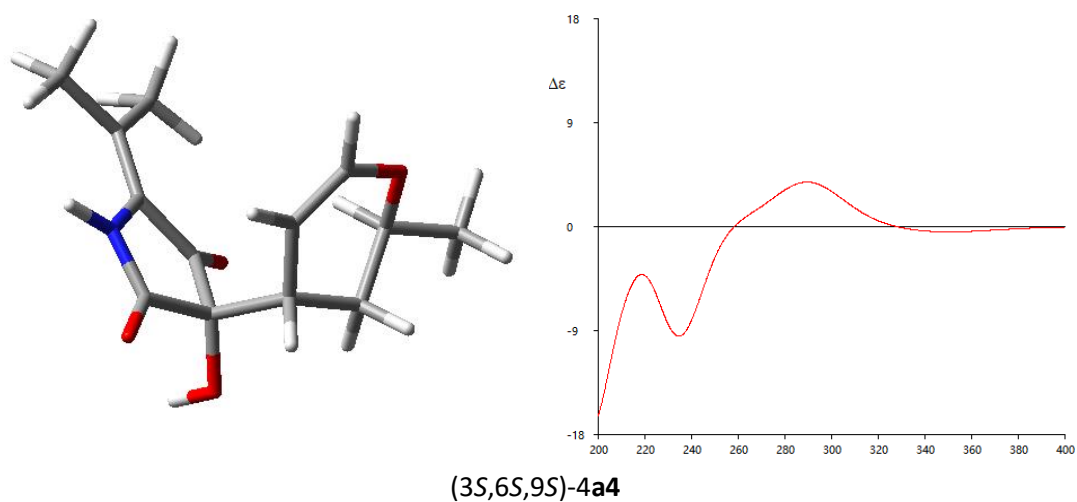

**Figure S61.** The optimized structures (left) and the calculated CD spectra for conformers (3S,6S,9S)-4a in MeOH at M06-2X/def2TZVP level (right).  $\sigma=0.30$  eV.

**Table S7.** Relative free energies<sup>a</sup> and equilibrium populations<sup>b</sup> of conformers for (3S,6R,9R)-4b<sup>c</sup>

| Conformer  | $\Delta G$ | P (%) |
|------------|------------|-------|
| <b>4b1</b> | 0.00       | 58.58 |
| <b>4b2</b> | 0.34       | 32.79 |
| <b>4b3</b> | 1.13       | 8.63  |

<sup>a</sup> B3LYP/6-31G(d), in kcal/mol. <sup>b</sup> From  $\Delta G$  values at 298.15 K. <sup>c</sup> in MeOH, no imaginary frequency.

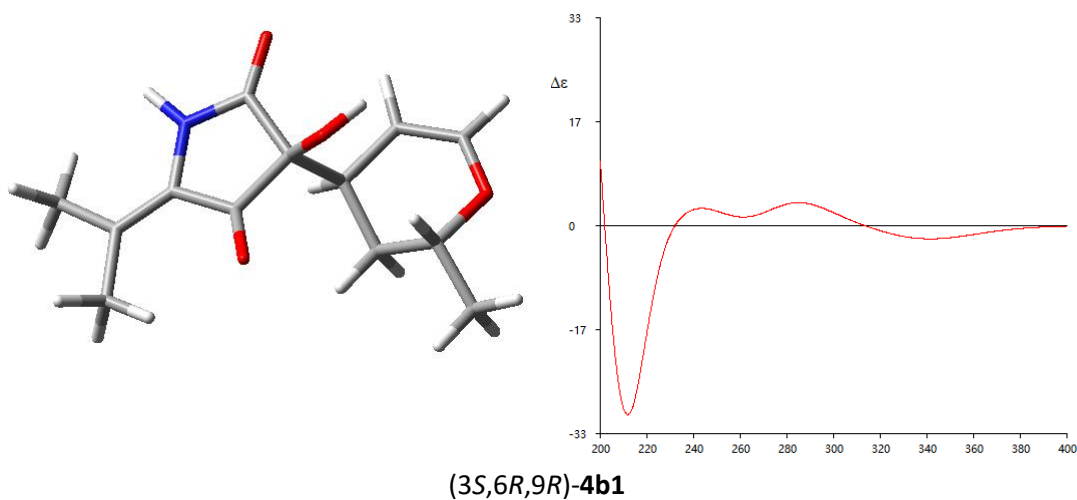

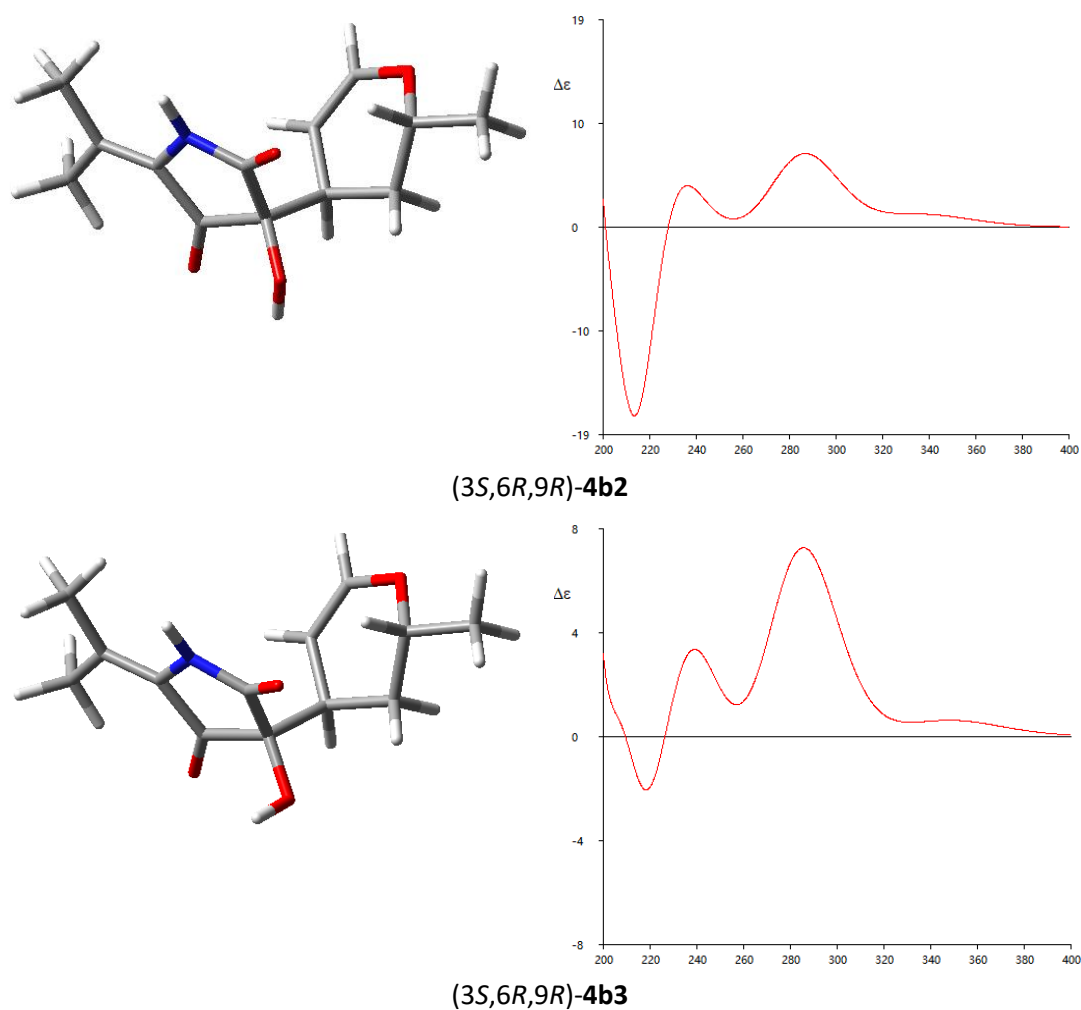

**Figure S62.** The optimized structures (left) and the calculated CD spectra for conformers (3S,6R,9R)-**4b** in MeOH at M06-2X/def2TZVP level (right).  $\sigma=0.30$  eV.

**Table S8.** Relative free energies<sup>a</sup> and equilibrium populations<sup>b</sup> of conformers for (3R,6R,9R)-**4c**<sup>c</sup>

| Conformer  | $\Delta G$ | P (%) |
|------------|------------|-------|
| <b>4c1</b> | 0.00       | 57.30 |
| <b>4c2</b> | 0.36       | 31.09 |
| <b>4c3</b> | 1.34       | 5.95  |
| <b>4c4</b> | 1.37       | 5.65  |

<sup>a</sup> B3LYP/6-31G(d), in kcal/mol. <sup>b</sup> From  $\Delta G$  values at 298.15 K. <sup>c</sup> in MeOH, no imaginary frequency.

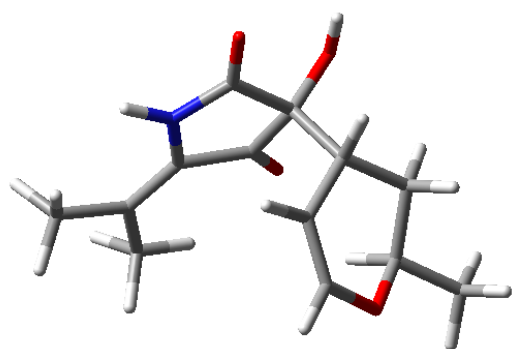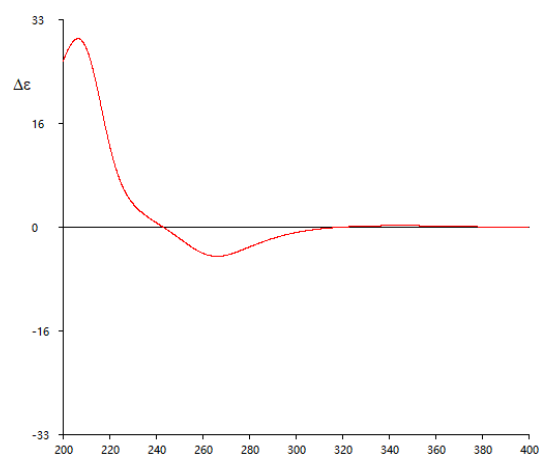

**(3*R*,6*R*,9*R*)-4c1**

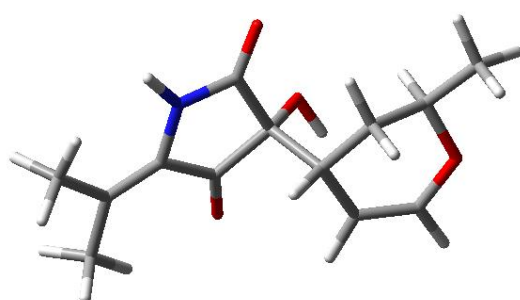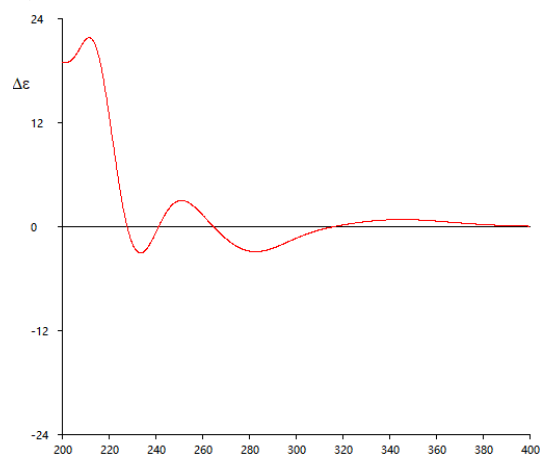

**(3*R*,6*R*,9*R*)-4c2**

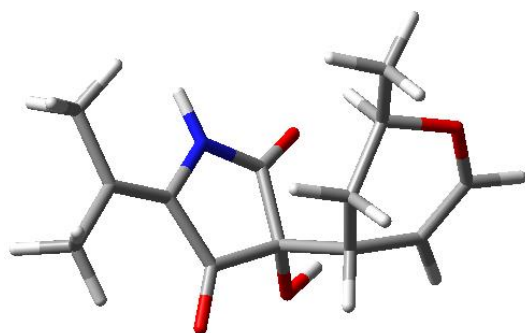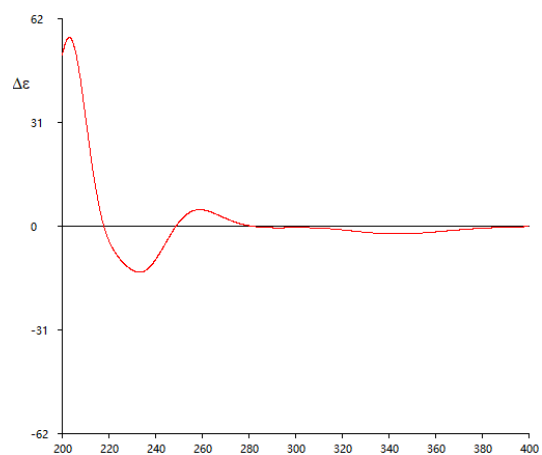

**(3*R*,6*R*,9*R*)-4c3**

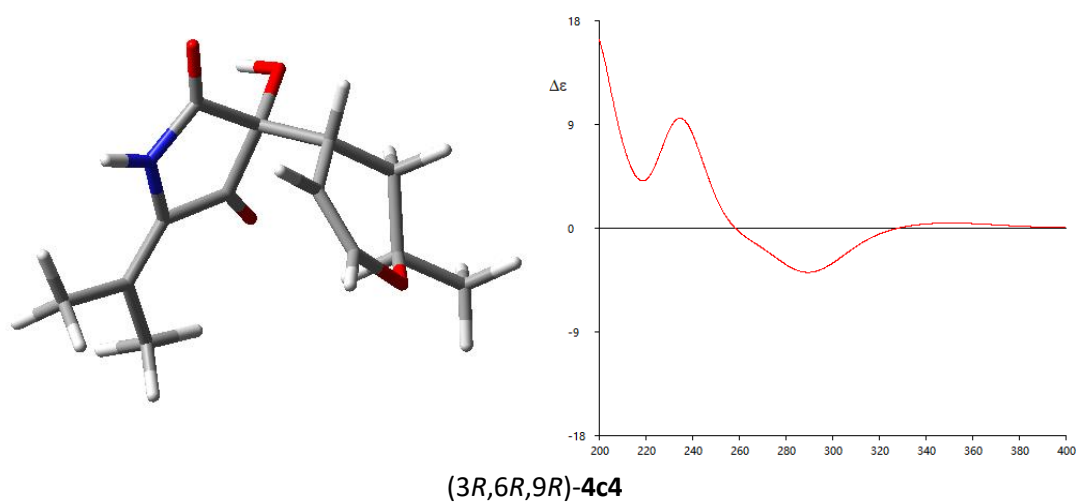

**Figure S63.** The optimized structures (left) and the calculated CD spectra for conformers (3R,6R,9R)-4c in MeOH at M06-2X/def2TZVP level (right).  $\sigma=0.30$  eV.

**Table S9.** Relative free energies<sup>a</sup> and equilibrium populations<sup>b</sup> of conformers for (3R,6S,9S)-4d<sup>c</sup>

| Conformer  | $\Delta G$ | P (%) |
|------------|------------|-------|
| <b>4d1</b> | 0.00       | 54.38 |
| <b>4d2</b> | 0.34       | 30.43 |
| <b>4d4</b> | 1.13       | 8.00  |
| <b>4d4</b> | 1.20       | 7.19  |

<sup>a</sup> B3LYP/6-31G(d), in kcal/mol. <sup>b</sup> From  $\Delta G$  values at 298.15 K. <sup>c</sup> in MeOH, no imaginary frequency.

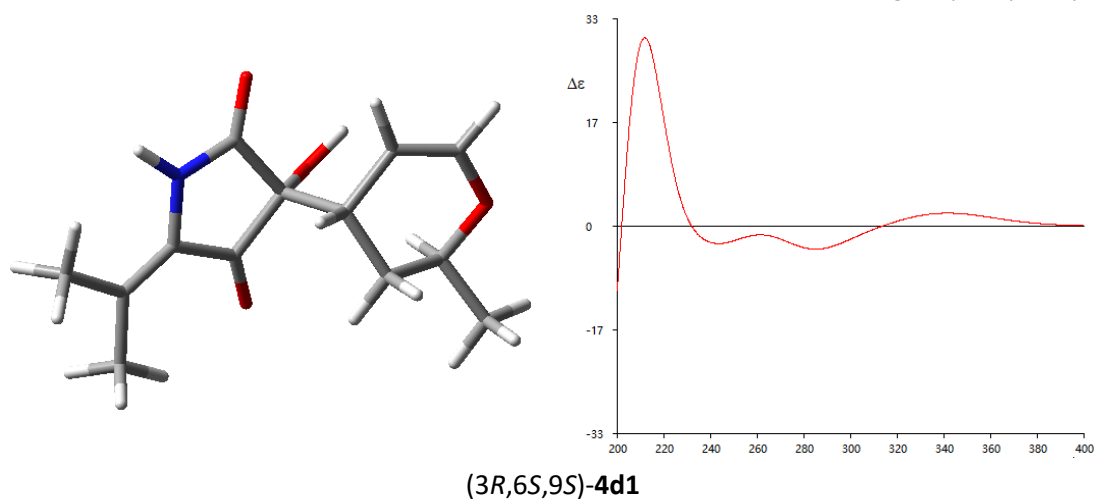

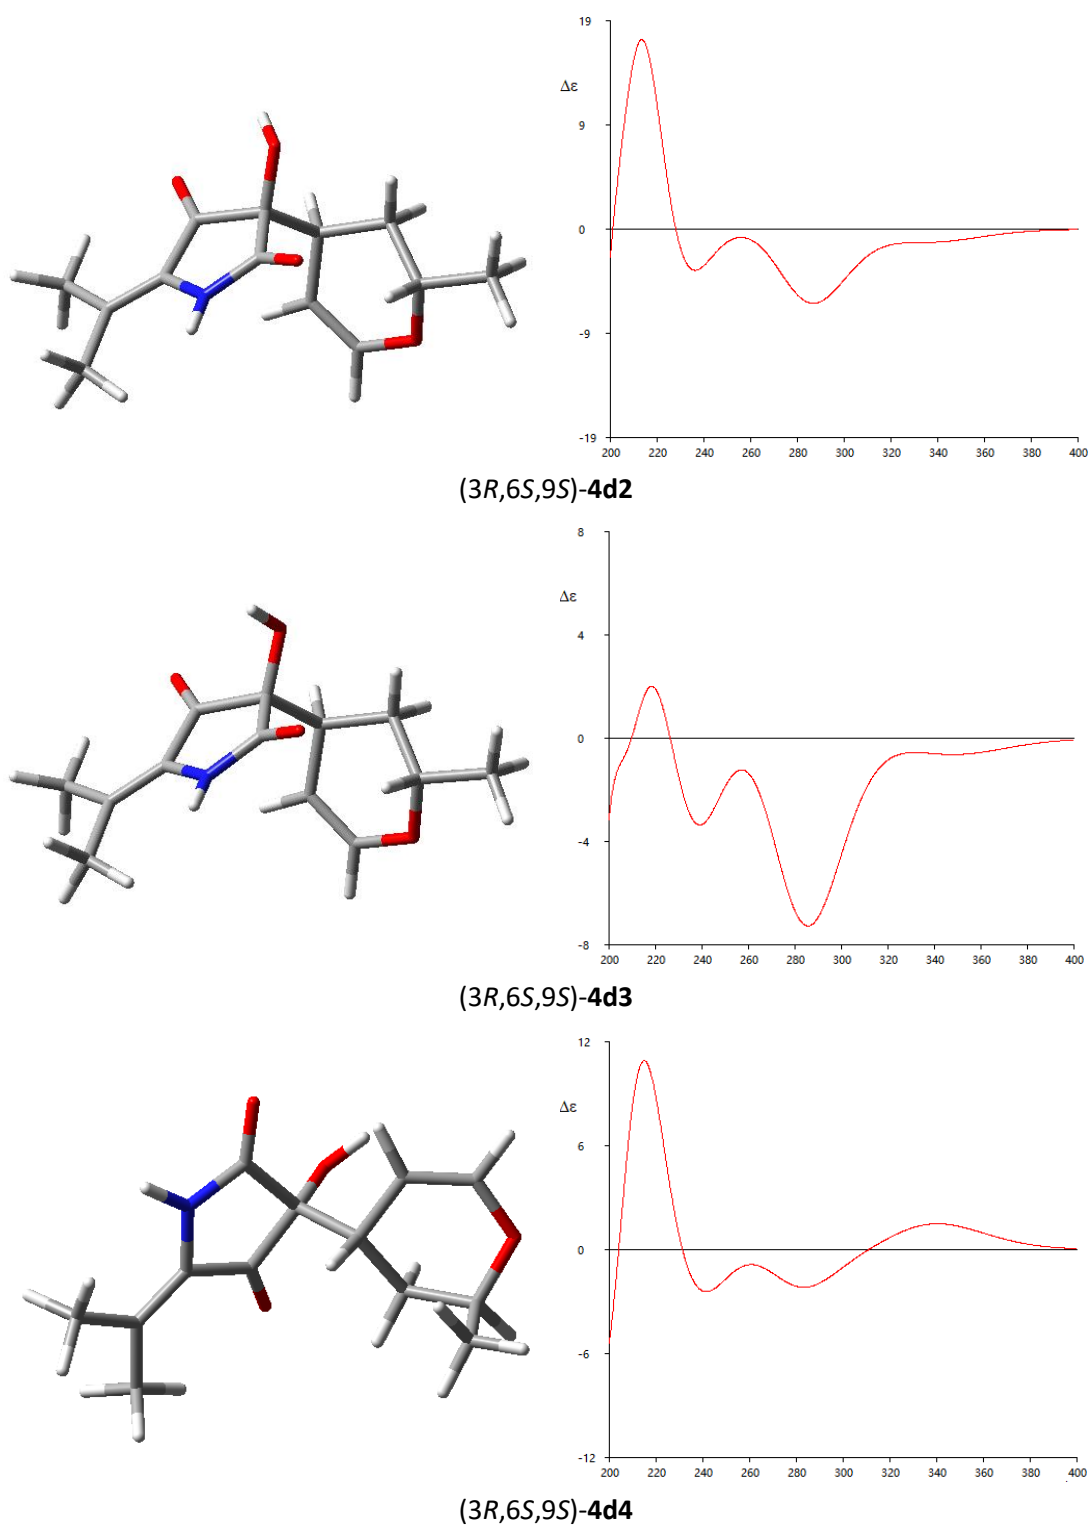

**Figure S64.** The optimized structures (left) and the calculated CD spectra for conformers (3R,6S,9S)-4d in MeOH at M06-2X/def2TZVP level (right).  $\sigma=0.30$  eV.

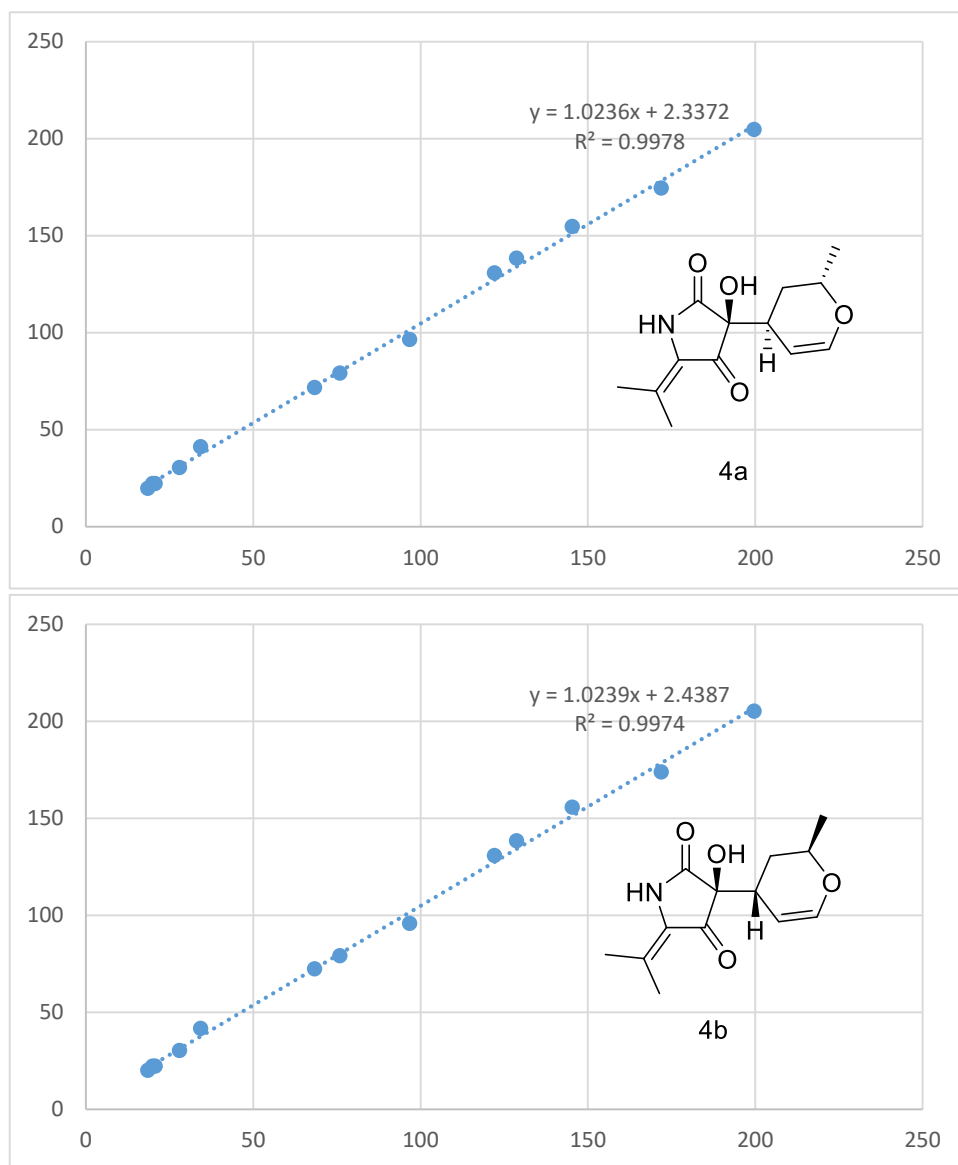

**Figure S65.** Correlation plots of experimental  $^{13}\text{C}$  NMR chemical shifts versus the corresponding calculated data for (3*S*, 6*S*, 9*S*)-**4a** and (3*S*, 6*R*, 9*R*)-**4b**

|        |      | DP4+         | 91.53%   | 8.47%    |
|--------|------|--------------|----------|----------|
| Nuclei | sp2? | Experimental | Isomer 1 | Isomer 2 |
| C      | x    | 122.07       | 130.833  | 130.781  |
| C      | x    | 199.64       | 204.715  | 205.3    |
| C      |      | 75.86        | 79.184   | 79.225   |
| C      | x    | 171.89       | 174.492  | 173.923  |
| C      | x    | 128.6        | 138.448  | 138.369  |
| C      |      | 18.44        | 19.821   | 20.057   |
| C      |      | 19.91        | 22.225   | 22.203   |
| C      |      | 34.26        | 41.124   | 41.651   |
| C      | x    | 96.65        | 96.549   | 95.898   |
| C      | x    | 145.25       | 154.707  | 155.726  |
| C      |      | 68.28        | 71.742   | 72.405   |
| C      |      | 27.95        | 30.437   | 30.371   |
| C      |      | 20.63        | 22.192   | 22.205   |

**Figure S66.** DP4+ probabilities (%) for conformers of (3*S*, 6*S*, 9*S*)-**4a** (isomer 1) and (3*S*, 6*R*, 9*R*)-**4b** (isomer 2).

**Table S10.** Relative free energies<sup>a</sup> and equilibrium populations<sup>b</sup> of conformers for (3*S*, 6*R*, 8*S*, 9*S*)-**5a**<sup>c</sup>

| Conformer  | $\Delta G$ | P (%) |
|------------|------------|-------|
| <b>5a1</b> | 0.00       | 24.26 |
| <b>5a2</b> | 0.10       | 20.40 |
| <b>5a3</b> | 0.15       | 18.97 |
| <b>5a4</b> | 0.17       | 18.20 |
| <b>5a5</b> | 0.17       | 18.17 |

<sup>a</sup> B3LYP/6-31G(d), in kcal/mol. <sup>b</sup> From  $\Delta G$  values at 298.15 K. <sup>c</sup> in MeOH, no imaginary frequency.

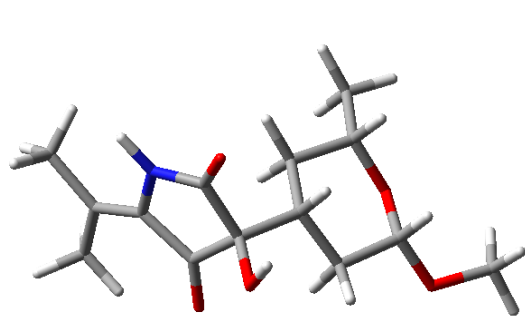

(3*S*,6*R*,8*S*,9*S*)-**5a1**

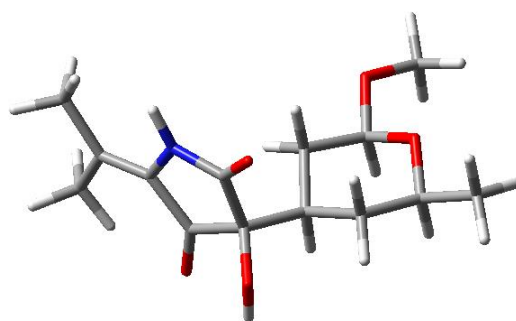

(3*S*,6*R*,8*S*,9*S*)-**5a2**

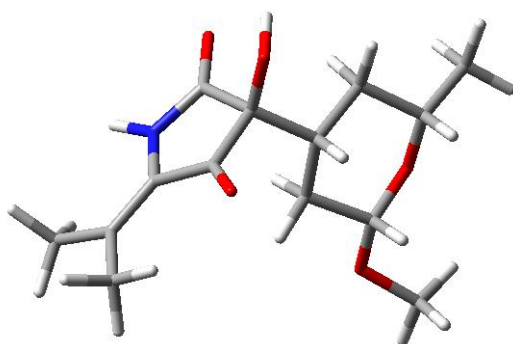

(3*S*,6*R*,8*S*,9*S*)-**5a3**

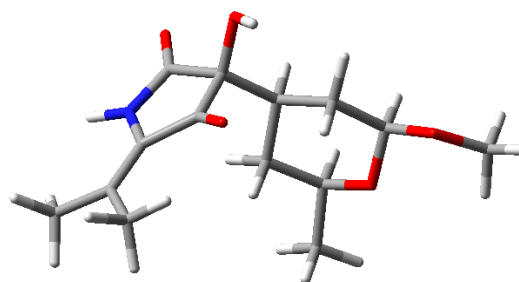

(3*S*,6*R*,8*S*,9*S*)-**5a4**

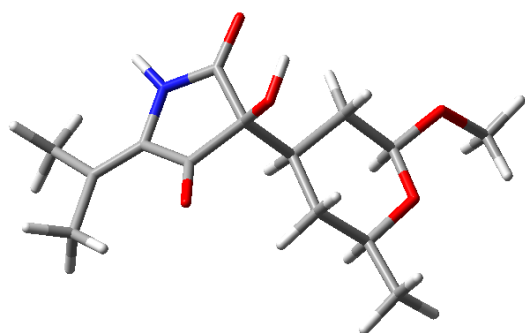

(3*S*,6*R*,8*S*,9*S*)-**5a5**

**Figure S67.** The optimized structure of conformers for (3*S*,6*R*,8*S*,9*S*)-**5a** in MeOH at B3LYP/6-31G (d) level

**Table S11.** Relative free energies<sup>a</sup> and equilibrium populations<sup>b</sup> of conformers for (3*S*,6*S*,8*R*,9*R*)-**5b**<sup>c</sup>

| Conformer  | $\Delta G$ | P (%) |
|------------|------------|-------|
| <b>5b1</b> | 0.00       | 48.08 |
| <b>5b2</b> | 0.32       | 28.22 |
| <b>5b3</b> | 0.65       | 16.14 |
| <b>5b4</b> | 1.10       | 7.56  |

<sup>a</sup> B3LYP/6-31G(d), in kcal/mol. <sup>b</sup> From  $\Delta G$  values at 298.15 K. <sup>c</sup> in MeOH, no imaginary frequency.

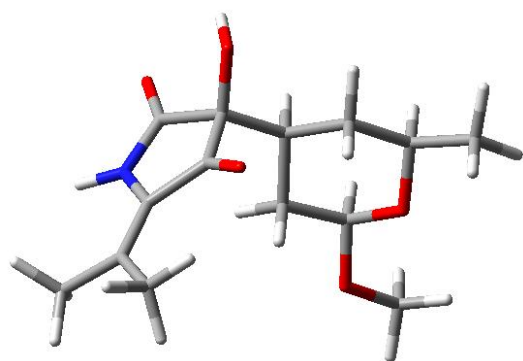

(3*S*,6*S*,8*R*,9*R*)-**5b1**

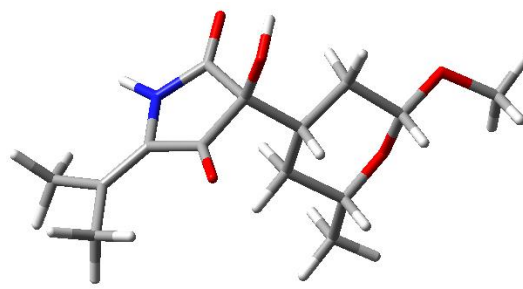

(3*S*,6*S*,8*R*,9*R*)-**5b2**

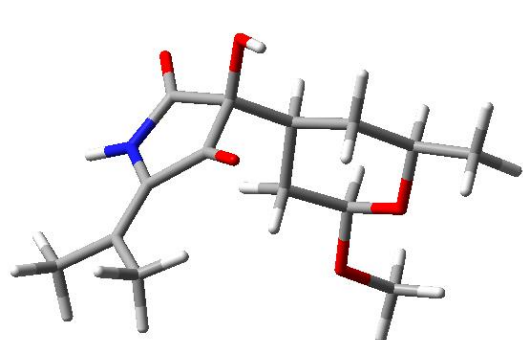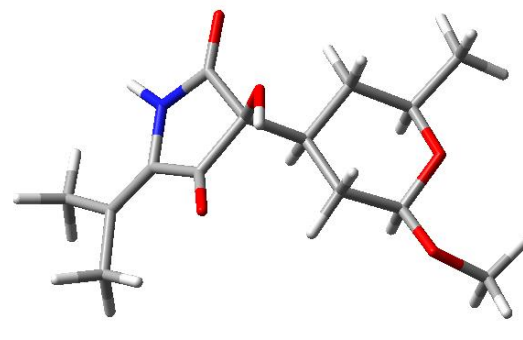



(3*S*,6*S*,8*R*,9*R*)-**5b3**

(3*S*,6*S*,8*R*,9*R*)-**5b4**

**Figure S68.** The optimized structure of conformers for (3*S*,6*S*,8*R*,9*R*)-**5b** in MeOH at B3LYP/6-31G (d) level

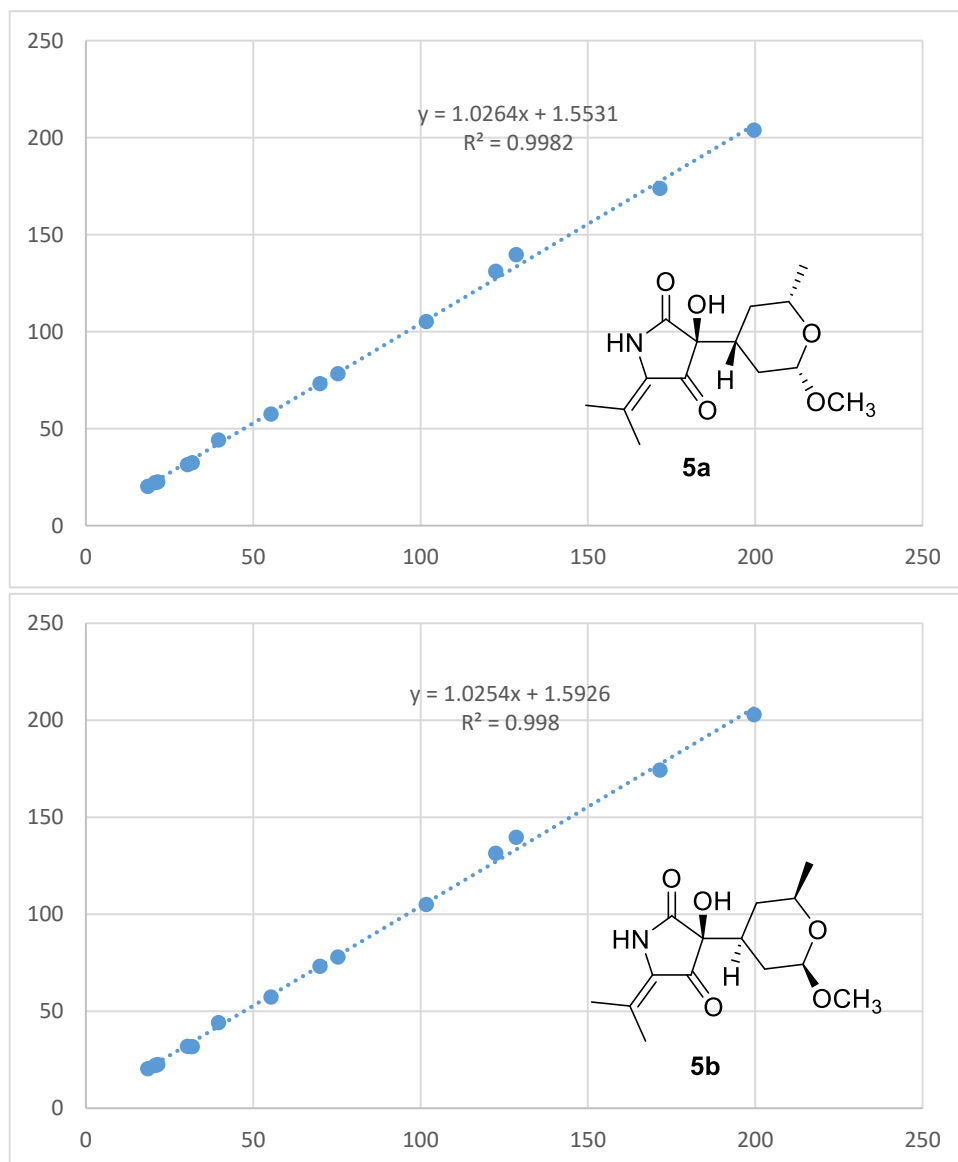

**Figure S69.** Correlation plots of experimental <sup>13</sup>C NMR chemical shifts versus the corresponding calculated data for (3*S*,6*R*,8*S*,9*S*)-**5a** and (3*S*,6*S*,8*R*,9*R*)-**5b**.

|        |      | DP4+         | 86.42%   | 13.58%   |
|--------|------|--------------|----------|----------|
| Nuclei | sp2? | experimental | Isomer 1 | Isomer 2 |
| C      | x    | 122.44       | 131.238  | 131.53   |
| C      | x    | 199.59       | 203.942  | 203.056  |
| C      |      | 75.29        | 78.338   | 78.149   |
| C      | x    | 171.51       | 173.932  | 174.402  |
| C      | x    | 128.5        | 139.759  | 139.848  |
| C      |      | 18.46        | 20.382   | 20.534   |
| C      |      | 20.69        | 22.232   | 22.16    |
| C      |      | 39.6         | 44.243   | 44.288   |
| C      |      | 30.31        | 31.56    | 31.994   |
| C      |      | 101.66       | 105.23   | 105.176  |
| C      |      | 69.93        | 73.333   | 73.261   |
| C      |      | 31.72        | 32.473   | 31.823   |
| C      |      | 21.45        | 22.653   | 22.652   |
| C      |      | 55.32        | 57.549   | 57.509   |

**Figure S70.** DP4+ probabilities (%) for conformers of (3*S*,6*R*,8*S*,9*S*)-**5a** (isomer 1) and (3*S*,6*S*,8*R*,9*R*)-**5b** (isomer 2).

**Table S12.** Relative free energies<sup>a</sup> and equilibrium populations<sup>b</sup> of conformers for (3*S*,6*S*,8*R*,9*S*)-**6a**<sup>c</sup>

| Conformer  | $\Delta G$ | P (%) |
|------------|------------|-------|
| <b>6a1</b> | 0.00       | 68.40 |
| <b>6a2</b> | 0.72       | 20.24 |
| <b>6a3</b> | 1.06       | 11.35 |

<sup>a</sup> B3LYP/6-31G(d), in kcal/mol. <sup>b</sup> From  $\Delta G$  values at 298.15 K. <sup>c</sup> in MeOH, no imaginary frequency.

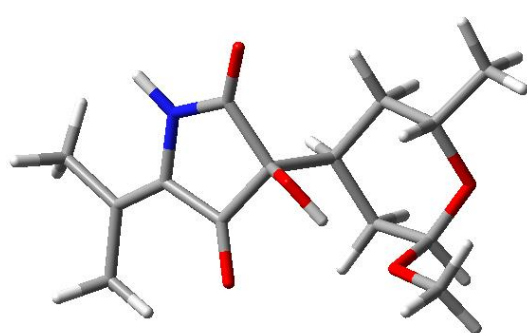

(3*S*,6*S*,8*R*,9*S*)-**6a1**

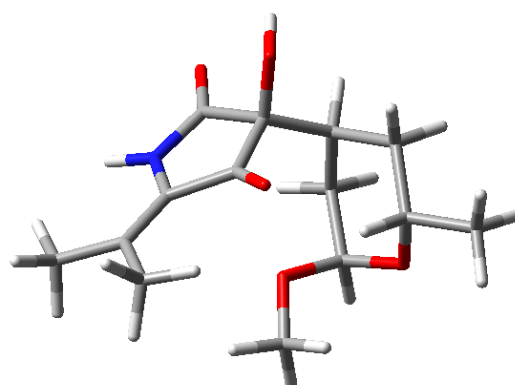

(3*S*,6*S*,8*R*,9*S*)-**6a2**

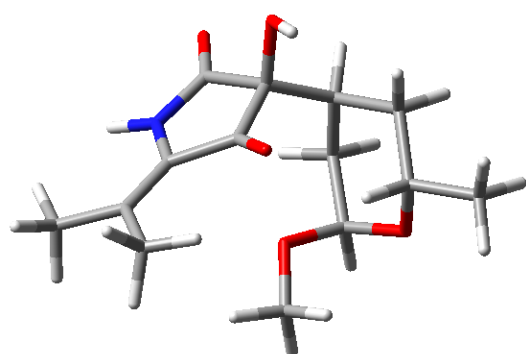

(3*S*,6*S*,8*R*,9*S*)-**6a3**

**Figure S71.** The optimized structure of conformers for (3*S*,6*S*,8*R*,9*S*)-**6a** in MeOH at B3LYP/6-31G (d) level.

**Table S13.** Relative free energies<sup>a</sup> and equilibrium populations<sup>b</sup> of conformers for (3*S*,6*R*,8*S*,9*R*)-**6b**<sup>c</sup>

| Conformer  | $\Delta G$ | P (%) |
|------------|------------|-------|
| <b>6b1</b> | 0.00       | 77.82 |
| <b>6b2</b> | 0.98       | 14.77 |
| <b>6b3</b> | 1.39       | 7.41  |

<sup>a</sup> B3LYP/6-31G(d), in kcal/mol. <sup>b</sup> From  $\Delta G$  values at 298.15 K. <sup>c</sup> in MeOH, no imaginary frequency.

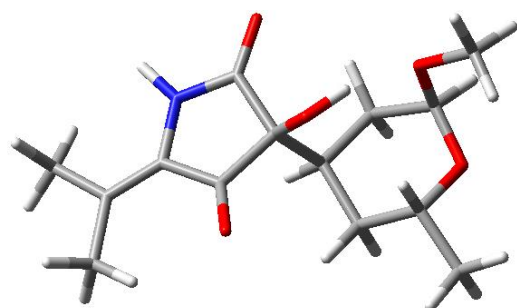

(3*S*,6*R*,8*S*,9*R*)-**6b1**

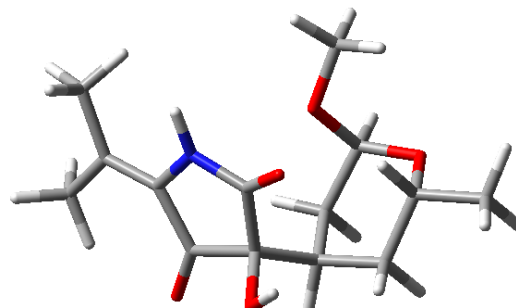

(3*S*,6*R*,8*S*,9*R*)-**6b2**

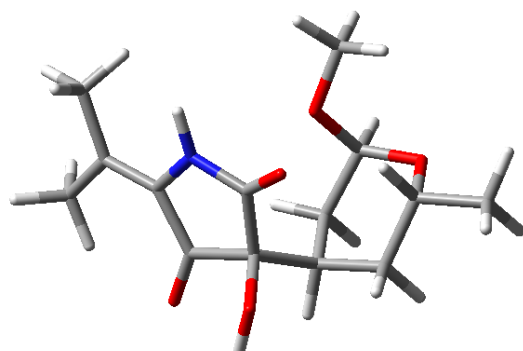

(3*S*,6*R*,8*S*,9*R*)-**6b3**

**Figure S72.** The optimized structure of conformers for (3*S*,6*R*,8*S*,9*R*)-**6b** in MeOH at B3LYP/6-31G (d) level.

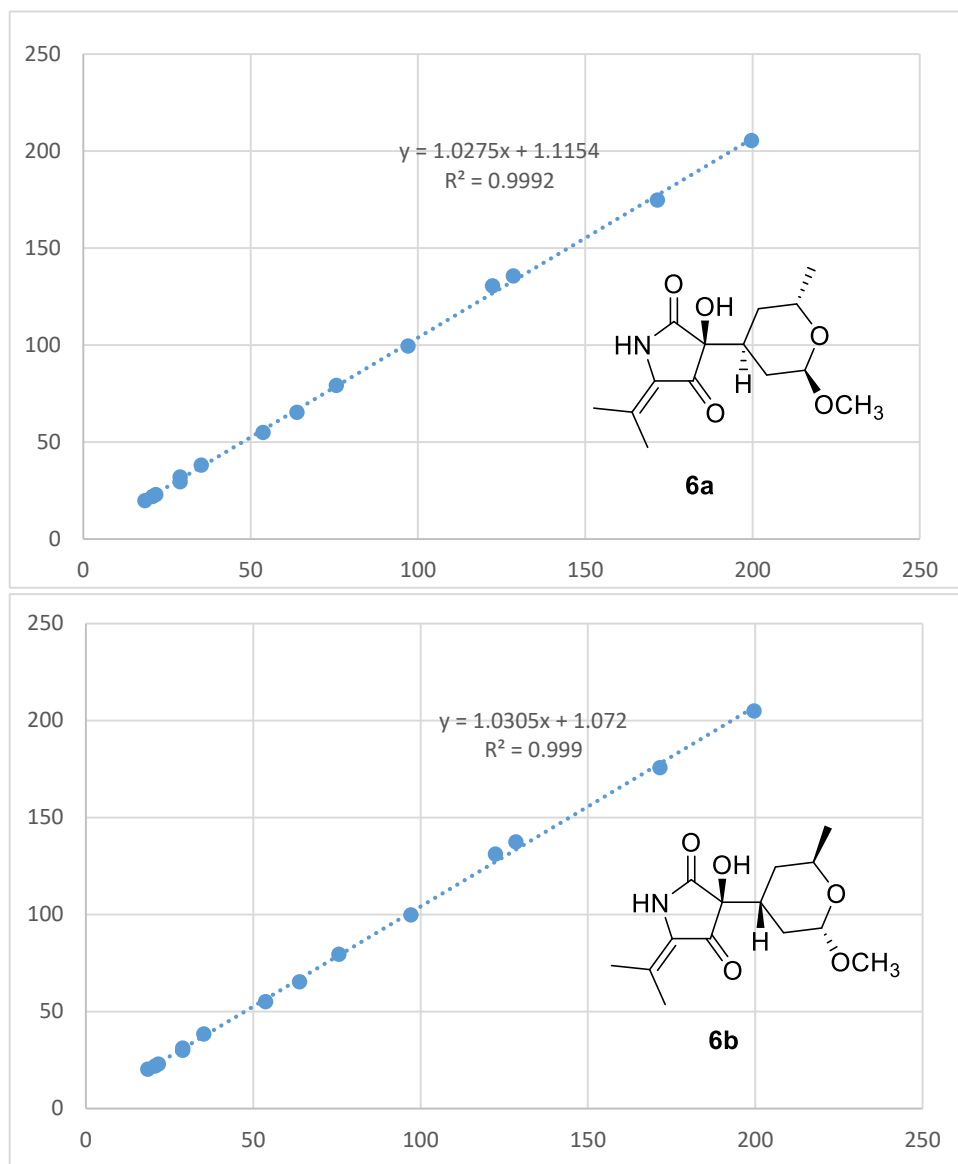

**Figure S73.** Correlation plots of experimental  $^{13}\text{C}$  NMR chemical shifts versus the corresponding calculated data for (3*S*,6*S*,8*R*,9*S*)-**6a** and (3*S*,6*R*,8*S*,9*R*)-**6b**

|        |      | DP4+         | 86.61%   | 13.39%   |
|--------|------|--------------|----------|----------|
| Nuclei | sp2? | experimental | Isomer 1 | Isomer 2 |
| C      | x    | 122.28       | 130.626  | 131.05   |
| C      | x    | 199.65       | 205.514  | 204.922  |
| C      |      | 75.55        | 79.267   | 79.475   |
| C      | x    | 171.53       | 174.733  | 175.655  |
| C      | x    | 128.44       | 135.751  | 137.446  |
| C      |      | 18.43        | 19.937   | 20.266   |
| C      |      | 20.66        | 22.002   | 21.895   |
| C      |      | 35.23        | 38.188   | 38.331   |
| C      |      | 28.86        | 29.628   | 29.974   |
| C      |      | 97.05        | 99.607   | 99.78    |
| C      |      | 63.82        | 65.342   | 65.329   |
| C      |      | 28.86        | 32.037   | 31.086   |
| C      |      | 21.6         | 22.914   | 22.846   |
| C      |      | 53.67        | 54.999   | 55.092   |

**Figure S74.** DP4+ probabilities (%) for conformers of (3*S*,6*S*,8*R*,9*S*)-**6a** (isomer 1) and (3*S*,6*R*,8*S*,9*R*)-**6b** (isomer 2).

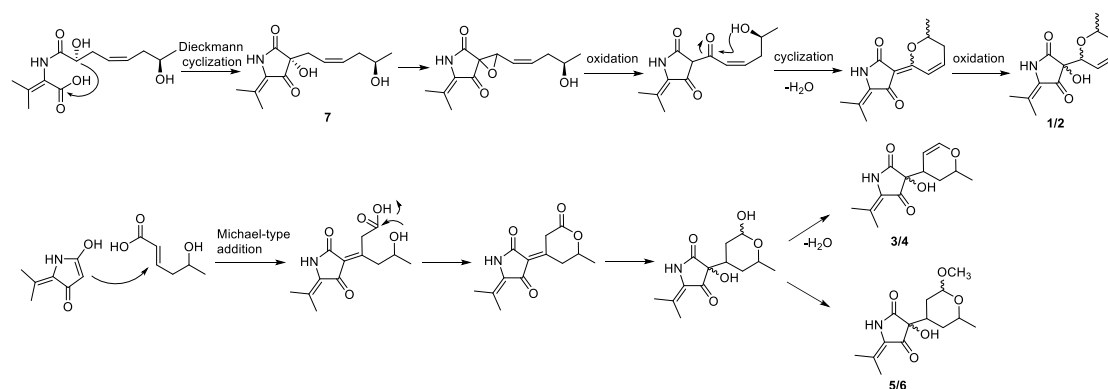

**Figure S74.** Proposed biosynthetic pathway of compounds **1–7** [1,2].

[1] Rischer, M.; Lee, S. R.; Eom, H. J.; Park, H. B.; Vollmer, J.; Kaster, A. K.; Shin, Y. H.; Oh, D. C.; Kim, K. H.; Beemelmans, C. Spirocyclic cladosporicin A and cladosporiumins I and J from a Hydractinia-associated *Cladosporium sphaerospermum* SW67. *Org. Chem. Front.* **2019**, *6*, 1084-1093.

[2] Mo, X.; Gulder, T. Biosynthetic strategies for tetramic acid formation. *Nat. Prod. Rep.* **2021**, *38*, 1555-1566.
